# Supplementary material for: Mental health issues and illness and substance use disorder (non-)disclosure to a supervisor: a cross-sectional study on beliefs, attitudes and needs of military personnel
Source: PubMed Central journal article supplement — BMJ Open. 2023 Apr 11;13(4):e063125. doi: 10.1136/bmjopen-2022-063125 (PMC10105997; doi:10.1136/bmjopen-2022-063125), 2023-04-11
Supplement: bmjopen-2022-063125.draft_revisions.pdf [file bmjopen-2022-063125.draft_revisions.pdf]

# BMJ Open

BMJ Open is committed to open peer review. As part of this commitment we make the peer review history of every article we publish publicly available.

When an article is published we post the peer reviewers' comments and the authors' responses online. We also post the versions of the paper that were used during peer review. These are the versions that the peer review comments apply to.

The versions of the paper that follow are the versions that were submitted during the peer review process. They are not the versions of record or the final published versions. They should not be cited or distributed as the published version of this manuscript.

BMJ Open is an open access journal and the full, final, typeset and author-corrected version of record of the manuscript is available on our site with no access controls, subscription charges or pay-per-view fees (<http://bmjopen.bmj.com>).

If you have any questions on BMJ Open's open peer review process please email [info.bmjopen@bmj.com](mailto:info.bmjopen@bmj.com)

# BMJ Open

## Mental illness and substance abuse (non-)disclosure to a supervisor: A cross-sectional study on beliefs, attitudes and needs of military personnel.

|                               |                                                                                                                                                                                                                                                                                                                                                                                                                                                                                                                                                                                                                                                                                                                                                                                                                                                                                                                                                                                                                                                                                                                                                    |
|-------------------------------|----------------------------------------------------------------------------------------------------------------------------------------------------------------------------------------------------------------------------------------------------------------------------------------------------------------------------------------------------------------------------------------------------------------------------------------------------------------------------------------------------------------------------------------------------------------------------------------------------------------------------------------------------------------------------------------------------------------------------------------------------------------------------------------------------------------------------------------------------------------------------------------------------------------------------------------------------------------------------------------------------------------------------------------------------------------------------------------------------------------------------------------------------|
| Journal:                      | <i>BMJ Open</i>                                                                                                                                                                                                                                                                                                                                                                                                                                                                                                                                                                                                                                                                                                                                                                                                                                                                                                                                                                                                                                                                                                                                    |
| Manuscript ID                 | bmjopen-2022-063125                                                                                                                                                                                                                                                                                                                                                                                                                                                                                                                                                                                                                                                                                                                                                                                                                                                                                                                                                                                                                                                                                                                                |
| Article Type:                 | Original research                                                                                                                                                                                                                                                                                                                                                                                                                                                                                                                                                                                                                                                                                                                                                                                                                                                                                                                                                                                                                                                                                                                                  |
| Date Submitted by the Author: | 23-Mar-2022                                                                                                                                                                                                                                                                                                                                                                                                                                                                                                                                                                                                                                                                                                                                                                                                                                                                                                                                                                                                                                                                                                                                        |
| Complete List of Authors:     | <p>Bogaers, Rebecca; Tilburg University Tilburg School of Social and Behavioral Sciences, Tranzo, Scientific Center for Care and Wellbeing; Brain Research and Innovation Centre</p> <p>Geuze, Elbert; Brain Research and Innovation Centre; Brain Center Rudolf Magnus, University Medical Center Utrecht, Department of Psychiatry</p> <p>van Weeghel, Jaap; Tilburg University Tilburg School of Social and Behavioral Sciences, Tranzo, Scientific Center for Care and Wellbeing</p> <p>Leijten, Fenna; Netherlands Ministry of Defence, Directorate-General of Policy, Directorate of Strategy and Knowledge</p> <p>van de Mheen, D; Tilburg University Tilburg School of Social and Behavioral Sciences, Tranzo, Scientific Center for Care and Wellbeing</p> <p>Greenberg, N; King's College London, King's Centre for Military Health Research</p> <p>Rozema, A; Tilburg University Tilburg School of Social and Behavioral Sciences, Tranzo, Scientific Center for Care and Wellbeing</p> <p>Brouwers, Evelien; Tilburg University Tilburg School of Social and Behavioral Sciences, Tranzo, Scientific Center for Care and Wellbeing</p> |
| Keywords:                     | MENTAL HEALTH, OCCUPATIONAL & INDUSTRIAL MEDICINE, PREVENTIVE MEDICINE, Substance misuse < PSYCHIATRY, PSYCHIATRY                                                                                                                                                                                                                                                                                                                                                                                                                                                                                                                                                                                                                                                                                                                                                                                                                                                                                                                                                                                                                                  |
|                               |                                                                                                                                                                                                                                                                                                                                                                                                                                                                                                                                                                                                                                                                                                                                                                                                                                                                                                                                                                                                                                                                                                                                                    |

SCHOLARONE™  
Manuscripts

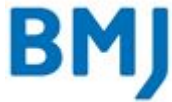

I, the Submitting Author has the right to grant and does grant on behalf of all authors of the Work (as defined in the below author licence), an exclusive licence and/or a non-exclusive licence for contributions from authors who are: i) UK Crown employees; ii) where BMJ has agreed a CC-BY licence shall apply, and/or iii) in accordance with the terms applicable for US Federal Government officers or employees acting as part of their official duties; on a worldwide, perpetual, irrevocable, royalty-free basis to BMJ Publishing Group Ltd ("BMJ") its licensees and where the relevant Journal is co-owned by BMJ to the co-owners of the Journal, to publish the Work in this journal and any other BMJ products and to exploit all rights, as set out in our [licence](#).

The Submitting Author accepts and understands that any supply made under these terms is made by BMJ to the Submitting Author unless you are acting as an employee on behalf of your employer or a postgraduate student of an affiliated institution which is paying any applicable article publishing charge ("APC") for Open Access articles. Where the Submitting Author wishes to make the Work available on an Open Access basis (and intends to pay the relevant APC), the terms of reuse of such Open Access shall be governed by a Creative Commons licence – details of these licences and which [Creative Commons](#) licence will apply to this Work are set out in our licence referred to above.

Other than as permitted in any relevant BMJ Author's Self Archiving Policies, I confirm this Work has not been accepted for publication elsewhere, is not being considered for publication elsewhere and does not duplicate material already published. I confirm all authors consent to publication of this Work and authorise the granting of this licence.

1  
2  
3 **Mental illness and substance abuse (non-)disclosure to a supervisor: A cross-sectional**  
4  
5 **study on beliefs, attitudes and needs of military personnel.**  
6  
7  
8  
9

10 Rebecca Bogaers<sup>\*a,b</sup>, Elbert Geuze<sup>b,c</sup>, Jaap van Weeghel<sup>a</sup>, Fenna Leijten<sup>d</sup>, Dike van de  
11  
12 Mheen<sup>a</sup>, Neil Greenberg<sup>e</sup>, Andrea Rozema<sup>a</sup>, Evelien Brouwers<sup>a</sup>.  
13  
14  
15  
16

17 <sup>a</sup>Tranzo, Scientific Center for Care and Wellbeing, Tilburg School of Social and Behavioral  
18 Sciences, Tilburg University, the Netherlands.; <sup>b</sup>Brain Research and Innovation Centre,  
19 Ministry of Defence, the Netherlands.; <sup>c</sup> Brain Center Rudolf Magnus, Department of  
20 Psychiatry, University Medical Center Utrecht, the Netherlands.; <sup>d</sup> Directorate of Strategy and  
21 Knowledge, Directorate-General of Policy, Ministry of Defence, the Netherlands.; <sup>d</sup> King's  
22 Centre for Military Health Research, King's College, United Kingdom.  
23  
24  
25

26 \*Corresponding author: r.i.bogaers@tilburguniversity.edu  
27  
28  
29  
30  
31  
32  
33  
34  
35  
36  
37  
38  
39  
40  
41  
42  
43  
44  
45  
46  
47  
48  
49  
50  
51  
52

53 **Word count:** 3612  
54

55 **Keywords:** Disclosure, Mental illness, Sustainable employment, Military, Stigma  
56  
57  
58  
59  
60

## Abstract

**Objectives.** Research suggests that military personnel frequently delay disclosing mental illness (MI), including substance abuse, to supervisors. This delay causes missed opportunities for support and workplace accommodations which may help to avoid adverse occupational outcomes. The current study aims to examine disclosure related beliefs, attitudes, and needs, to create better understanding of personnel's disclosure decision-making. **Design.** A cross-sectional questionnaire study among military personnel with and without MI. Beliefs, attitudes, and needs regarding the (non-)disclosure decision to a supervisor were examined, including factors associated with (non-)disclosure intentions and decisions. Descriptive and regression (logistic and ordinal) analyses were performed. **Setting.** The study took place within the Dutch military. **Participants.** Military personnel with MI (N=324) and without MI (N=554) participated in this study. **Outcome measure.** (Non-)disclosure intentions and decisions. **Results.** Common beliefs and attitudes pro non-disclosure were the preference to solve one's own problems (68.3%), the preference for privacy (58.9%), and a variety of stigma related concerns. Common beliefs and attitudes pro disclosure were that personnel wanted to perform well at work (93.3%) and the desire to act responsibly towards work colleagues (84.5%). The most reported need for future disclosure (96.8%) was having a supervisor who shows understanding for mental illness. The following factors were associated both with non-disclosure intentions and decisions: higher preference for privacy (OR(95%CI) = 1.99(1.50–2.65)<sub>intention</sub>, 2.05(1.12–3.76)<sub>decision</sub>) and self-management (OR(95%CI) = 1.64(1.20–2.23)<sub>intention</sub>, 1.79(1.00–3.20)<sub>decision</sub>), higher stigma related concerns (OR(95%CI) = 1.76(1.12–2.77)<sub>intention</sub>, 2.21(1.02–4.79)<sub>decision</sub>), and lower quality of supervisor-employee relationship (OR(95%CI) = .25(.15–.42)<sub>intention</sub>, .47(.25–.87)<sub>decision</sub>). **Conclusion.** To facilitate (early-)disclosure to a supervisor, creating opportunity for workplace support, interventions should focus on decreasing stigma and discrimination

1  
2  
3 and align with personnel's preference for self-management. Furthermore, training is needed  
4  
5 for supervisors on how to recognize, and effectively communicate with, personnel with MI.  
6  
7 Focus should also be on improving supervisor-employee relationships.  
8  
9

## 10 11 **Article Summary**

### 12 13 **Strengths and Limitations of this study**

- 14  
15  
16 • Disclosure of mental illness to a supervisor was examined in the military, a context in  
17  
18 which little research has been done on this topic.
- 19  
20 • This study included a group that is usually hard to study, namely military personnel  
21  
22 who have not disclosed.
- 23  
24 • This study included both personnel with and without mental illness, providing  
25  
26 insights for interventions for personnel who may develop mental illness in the future.
- 27  
28 • The sample is not representative for the entire military, due to the sampling method.
- 29  
30 • Due to the cross-sectional design of the study, no causality can be presumed.  
31  
32  
33  
34  
35  
36  
37  
38  
39  
40  
41  
42  
43  
44  
45  
46  
47  
48  
49  
50  
51  
52  
53  
54  
55  
56  
57  
58  
59  
60

## Introduction

The decision for workers whether to disclose their mental illness (MI), including substance abuse, to their supervisors can have far-reaching consequences for their sustainable employment (1-4). Disclosure can lead to workplace support and accommodations, which can prevent worsened symptoms and sick-leave, and non-disclosure can lead to missed opportunities for this support (2, 3, 5). However, disclosure can also lead to being stigmatized and discriminated against (6, 7).

The disclosure dilemma is expected to be even more prominent for trauma-prone occupations, such as the military, where workers are expected to be 'strong' and disclosure may yield less positive outcomes (5, 8). Additionally, workers in these high-risk occupations are exposed to stressors at work, increasing their risk of developing MI (9). Previous research in the military showed that there is a high preference for solving one's own problems (10), there are stigma related concerns and military personnel tend to delay seeking help (6, 11, 12). Together this might cause a delay in disclosure to a supervisor. To facilitate (early-)disclosure, so that personnel can receive support which can prevent adverse occupational outcomes (2, 3, 5), more insight is needed into the (non-)disclosure decision.

Although the (non-)disclosure decision is complex and has far-reaching consequences, research on this matter is scarce and mostly qualitative, especially in the military (3, 6, 11, 13). Research has shown that the supervisor plays an important role, where supervisor attitude and behavior can form both a barrier as well as be a facilitator for disclosure (6, 14, 15). Furthermore, "The model of employee decision-making about disclosure of a mental disorder at work" proposes that there is a default position of non-disclosure, caused by fear of stigma, wanting to maintain boundaries, and maintaining confidentiality (16). This model proposes that a triggering incident is needed before a disclosure decision is made (16).

1  
2  
3 The aim of the current study is to gain insight into the (non-)disclosure decision to a  
4 supervisor in the military, and to confirm and expand earlier qualitative findings (6). As  
5 personnel with and without MI have shown to have different views on treatment seeking (10,  
6 12), the current study will examine both actual disclosure decisions in personnel with MI as  
7 well as future disclosure intentions for those without MI. The research questions are: (1)  
8 ‘What are beliefs, attitudes, and needs of military personnel regarding disclosure to a  
9 supervisor?’, (2) ‘Do disclosers, differ from non-disclosers, and if so, how?’, and (3) ‘What  
10 factors are associated with non-disclosure to a supervisor?’.

## 23 24 **Method**

### 25 26 **Design**

27  
28 A cross-sectional observational design with an online questionnaire. Comparisons  
29 were made based on past disclosure decisions for personnel with MI and on disclosure  
30 intention for those without MI. Data collection happened simultaneously with a study on  
31 treatment seeking for MI (12). The strobe-checklist was used to report this study (17).

### 32 33 34 35 36 37 38 39 40 **Setting**

41  
42 This study took place within the Dutch military, where healthcare is organized  
43 internally. There are sanctions for use of soft and hard drugs. However, when substance  
44 abuse is reported to a mental health professional, there are confidentiality agreements (10).

### 45 46 47 48 49 50 51 52 **Patient and public involvement**

53  
54 Different stakeholders from the Dutch military (psychologists, psychiatrists, policy-  
55 makers and military personnel) were involved in the development of the questionnaire. They  
56  
57  
58  
59  
60



1  
2  
3 provided advise on the language used in the questionnaire to ensure that it was military  
4 appropriate language. They also provided advise on the best way to recruit participants.  
5  
6  
7  
8  
9

## 10 11 **Participant recruitment**

12  
13  
14 Active-duty military personnel who have been on deployment in the past 5 years were  
15 recruited. To ensure that both personnel with and without MI would be present in the sample,  
16 existing data from a questionnaire personnel receive after deployment was used to select a  
17 sample. This questionnaire includes scores of depression, aggression, alcohol abuse and  
18 PTSD. Clinical cut-off scores were used to identify personnel with and without an indication  
19 of MI. Next, a stratified sample, based on gender, age, military division and rank of personnel  
20 was approached, half with indication of MI (N=1000) and half without (N=1000).  
21  
22  
23  
24  
25  
26  
27  
28  
29

30 Data were collected between January and February 2021. All personnel were invited  
31 at the same time, both by e-mail and a letter. Reminders were sent after 3 and 5 weeks. It was  
32 made clear that the responses to the questionnaire would be anonymous.  
33  
34  
35  
36  
37  
38

## 39 **Measures**

### 40 41 *Demographics*

42  
43 Gender, age, marital status, education-level, type of work (operational or not),  
44 military department, rank, and years of service were assessed.  
45  
46  
47

### 48 49 *Mental illness*

50  
51 **Current MI.** To assess current MI, following measures were used; (a)Hospital  
52 anxiety and depression scale (18), (b)ASSIST-LITE for substance abuse (19), (c)AUDIT-C,  
53 for alcohol abuse (20), and (d)PTSD checklist for DSM-5 (21). For psychometric properties  
54 and cut-off scores, see appendix A.  
55  
56  
57  
58  
59  
60

1  
2  
3       **Self-reported MI.** Personnel were asked whether they have (had) MI. Group  
4 membership (i.e., current/past MI or no MI) was determined based on this. If personnel  
5 reported having (had) MI, they received a list of 15 possible types of MI (see appendix B)  
6 and were asked to indicate whether it concerned current or past MI, in line with earlier  
7 research (12, 22, 23). They were asked whether the MI was work-related (yes/no) and to rate  
8 the severity of their symptoms (during the worst time) on a scale of 0 –10.  
9  
10  
11  
12  
13  
14  
15  
16  
17  
18

### 19       *(Non-)Disclosure intentions and decisions*

20  
21       Personnel with MI were asked whether they had disclosed to their supervisor (yes/no).  
22 Personnel without MI were asked, in case they would develop MI in the future, whether they  
23 would disclose this to their supervisor, using a 4-point scale ranging from very-unlikely to  
24 very-likely.  
25  
26  
27  
28  
29  
30  
31  
32

### 33       *Beliefs, attitudes and needs*

34  
35       Based on a recent qualitative study on disclosure within the Dutch military (6), a  
36 study in the German military (11) and literature reviews on disclosure (2, 3), 24 statements  
37 pro disclosure and pro non-disclosure were developed, see Table 2 in the results section.  
38 Stigma was found to be a main barrier to disclosure in our qualitative study (6). Therefore,  
39 several stigma related statements were included. Participants were asked to indicate on a 4-  
40 point scale to what extent they agreed with the statements, ranging from completely disagree  
41 to completely agree.  
42  
43  
44  
45  
46  
47  
48  
49

50  
51       Personnel without MI were asked additional questions about their needs regarding  
52 disclosure if they would develop MI in the future. Based on findings from the earlier  
53 qualitative study (6), they were given seven options (e.g. a supervisor who shows  
54  
55  
56  
57  
58  
59  
60

1  
2  
3 understanding for MI) and were asked to rate these on a 4-point scale ranging from ‘Not at  
4  
5 all’ to ‘Very much’, see Table 2 in the results section.  
6  
7  
8  
9

### 10 **(Previous) experience**

11  
12 **Familiarity.** Participants were asked about MI in their surroundings using an  
13  
14 adaptation of the Level of Contact Report (24), following earlier research (23, 25). The total  
15  
16 score was used.  
17  
18

19 **Previous experience.** Participants were asked whether they had previous experience,  
20  
21 and/or seen experiences of others, with disclosure to a supervisor. If yes, they were asked  
22  
23 whether this experience was positive or negative.  
24  
25  
26  
27

### 28 **Work context**

29  
30 **Unit cohesion.** A three-item measure was used for perceived unit cohesion (26). For  
31  
32 example ‘*the members of my unit are cooperative with each other*’. Items were measured on  
33  
34 a 5-point scale ranging from ‘Completely-disagree’ to ‘Completely-agree’. Mean scores were  
35  
36 used. Participants with MI were asked about unit cohesion at the time they experienced MI  
37  
38 (26).  
39  
40  
41

42 **Relationship supervisor.** A six-item measure for the relationship with the supervisor  
43  
44 from the Questionnaire on the Experience and Evaluation of Work (QEEW) was used. This  
45  
46 questionnaire is the most used and validated questionnaire for work experiences in the  
47  
48 Netherlands (27). Items were measured on a 4-point scale with answer categories ‘Always’,  
49  
50 ‘Often’, ‘Sometimes’ and ‘Never’. Mean scores were used, with higher scores indicating  
51  
52 better relationship quality. Participants with MI were asked about the relationship at the time  
53  
54 they experienced MI.  
55  
56  
57  
58  
59  
60

## Statistical analyses

For beliefs, attitudes, and needs surrounding (non-)disclosure, descriptive analyses were performed. Chi-square tests and Mann-Whitney U-tests were used for comparisons between those who disclosed/intended to disclose and those who did not, as variables were not normally distributed.

To examine factors associated with (non-)disclosure, two separate analyses were performed. For personnel with MI, a logistic regression was performed with non-disclosure decision as the dependent variable (0=disclosure, 1=non-disclosure). For personnel without MI, an ordinal regression was performed, as disclosure intention had more than two categories. As the assumption of proportional odds was violated at first, the categories 'very unlikely' and 'unlikely' were merged, resulting in the dependent variable non-disclosure intention with categories 1=Very-likely, 2=likely, and 3=(Very)-unlikely. To prevent loss of information 'likely' and 'very-likely' were not combined. Fear of negative career consequences, social rejection, discrimination, self-stigma, shame, fear of receiving blame, fear of gossip and confidentiality concerns were combined into one (mean) measure of stigma, as they are all aspects of stigma (28). Together these items formed a reliable scale ( $\alpha_{\text{with MI}}=.89$ ,  $\alpha_{\text{without MI}}=.91$ ). There were no missing data, as forced response answers were used during data acquisition. All analyses were performed using SPSS.

## Ethical considerations

Written informed consent was obtained from all subjects/patients. The authors assert that all procedures contributing to this work comply with the ethical standards of the relevant national and institutional committees on human experimentation and with the Helsinki Declaration of 1975, as revised in 2008. All procedures involving human subjects/patients

1  
2  
3 were approved by the Tilburg School of Social and Behavioral Sciences Ethics Review  
4  
5 Boards (approval number RP324) and the Dutch Military Ethics Review Board.  
6  
7  
8  
9

## 10 **Results**

### 11 **Participant characteristics**

#### 12 ***Response rate***

13  
14  
15 After removing duplicates (caused by personnel going on multiple deployments)  
16  
17 and personnel who had left active service from the original sample, a total of N=1627 eligible  
18  
19 respondents were left. Of those, 63% (N=1025) started the questionnaire, and 54% (N=878)  
20  
21 fully completed it and were used for further analysis. Compared to personnel who completed  
22  
23 the questionnaire, those who did not complete it included more females  
24  
25 ( $\chi^2(1, N=1008)=6.01, p=.014$ ), more lower and middle education level  
26  
27 ( $\chi^2(2, N=1008)=7.25, p=.027$ ), and more non-commissioned officers  
28  
29 ( $\chi^2(2, N=1006)=8.26, p=.016$ ). The majority quit while answering mental health questions.  
30  
31  
32  
33  
34  
35  
36  
37  
38

#### 39 ***Non-disclosure (intentions)***

40  
41 Of those with MI (N=324), 24.4% indicated not having disclosed their MI to their  
42  
43 supervisor. Of those without MI (N=554), 15.6% did not intend to disclose if they would  
44  
45 develop MI in the future.  
46  
47  
48  
49

#### 50 ***Sample characteristics***

51  
52 Sample characteristics can be found in Table 1. For personnel with MI, there was a  
53  
54 significant association between marital status and non-disclosure decision  
55  
56 ( $\chi^2(1, N=324)=5.53, p=.019$ ) with more people with a partner within the non-disclosers group.  
57  
58 Those who had not disclosed, reported significantly lower symptom severity (M=6.01)  
59  
60

compared to those who had disclosed ( $M=7.38, U=5885.5, Z=-5.37, p<.001$ ). For personnel without MI, there were no significant differences in demographics based on non-disclosure intentions. Information on reported MI can be found in Appendix B.

**Table 1. Characteristics of the sample separated by military personnel with and without mental illness.**

|                                                | Military personnel with mental illness |                        |                    | Military personnel without mental illness |                                     |                |
|------------------------------------------------|----------------------------------------|------------------------|--------------------|-------------------------------------------|-------------------------------------|----------------|
|                                                | Disclosure<br>N=245                    | Non-disclosure<br>N=79 | Total<br>N=324     | Disclosure<br>intention<br>N=467          | Non-disclosure<br>intention<br>N=87 | Total<br>N=554 |
|                                                | N (%)                                  | N (%)                  | N (%)              | N (%)                                     | N (%)                               | N (%)          |
| <b>Demographics</b>                            |                                        |                        |                    |                                           |                                     |                |
| Sex                                            |                                        |                        |                    |                                           |                                     |                |
| Male                                           | 215 (87.8)                             | 68 (86.1)              | 283 (87.4)         | 430 (92.1)                                | 79 (90.8)                           | 509 (91.9)     |
| Female                                         | 30 (12.2)                              | 11 (13.9)              | 41 (12.7)          | 37 (7.9)                                  | 8 (9.2)                             | 45 (8.1)       |
| Age                                            |                                        |                        |                    |                                           |                                     |                |
| <20                                            | 0 (0.0)                                | 0 (0.0)                | 0 (0.0)            | 0 (0.0)                                   | 0 (0.0)                             | 0 (0.0)        |
| 21-30                                          | 15 (6.1)                               | 12 (15.2)              | 27 (8.3)           | 55 (11.8)                                 | 10 (11.5)                           | 65 (11.7)      |
| 31-40                                          | 81 (33.1)                              | 26 (32.9)              | 107 (33.0)         | 149 (31.9)                                | 41 (47.1)                           | 190 (34.3)     |
| 41-50                                          | 76 (31.0)                              | 19 (24.1)              | 95 (29.3)          | 134 (28.7)                                | 18 (20.7)                           | 152 (27.4)     |
| 51-60                                          | 68 (27.8)                              | 21 (26.6)              | 89 (27.5)          | 119 (25.5)                                | 17 (19.5)                           | 136 (24.6)     |
| >60                                            | 5 (2.0)                                | 1 (1.3)                | 6 (1.9)            | 10 (2.1)                                  | 1 (1.2)                             | 11 (2.0)       |
| Marital Status                                 |                                        |                        |                    |                                           |                                     |                |
| Partner (vs. Single)                           | <b>183 (74.7)</b>                      | <b>69 (87.3)</b>       | <b>252 (77.8)</b>  | 394 (84.4)                                | 76 (87.4)                           | 470 (84.8)     |
| Educational Level                              |                                        |                        |                    |                                           |                                     |                |
| Low                                            | 26 (10.6)                              | 4 (5.1)                | 30 (9.3)           | 49 (10.5)                                 | 2 (2.3)                             | 51 (9.2)       |
| Medium                                         | 136 (55.5)                             | 39 (49.4)              | 175 (54.0)         | 242 (51.8)                                | 48 (55.2)                           | 290 (52.4)     |
| High                                           | 83 (33.9)                              | 36 (45.6)              | 119 (36.7)         | 176 (37.7)                                | 37 (42.5)                           | 213 (38.5)     |
| <b>Work related context</b>                    |                                        |                        |                    |                                           |                                     |                |
| Type of work                                   |                                        |                        |                    |                                           |                                     |                |
| Operational work                               | 188 (76.7)                             | 67 (84.8)              | 255 (78.7)         | 258 (55.3)                                | 50 (57.5)                           | 308 (55.6)     |
| Military branch                                |                                        |                        |                    |                                           |                                     |                |
| Marine                                         | 20 (8.2)                               | 2 (2.5)                | 22 (6.8)           | 75 (16.1)                                 | 16 (18.4)                           | 91 (16.4)      |
| Army                                           | 119 (48.6)                             | 47 (59.5)              | 166 (51.2)         | 196 (42.0)                                | 40 (46.0)                           | 236 (42.6)     |
| Air-force                                      | 69 (28.2)                              | 15 (19.0)              | 84 (25.9)          | 120 (25.7)                                | 15 (17.2)                           | 135 (24.4)     |
| Military-police                                | 16 (6.5)                               | 4 (5.1)                | 20 (6.2)           | 21 (4.5)                                  | 5 (5.7)                             | 26 (4.7)       |
| Staff                                          | 20 (8.2)                               | 11 (13.9)              | 31 (9.6)           | 53 (11.3)                                 | 11 (12.6)                           | 64 (11.6)      |
| Other                                          | 1 (.4)                                 | 0 (0.0)                | 1 (.3)             | 2 (.4)                                    | 0 (0.0)                             | 2 (.4)         |
| Ranks                                          |                                        |                        |                    |                                           |                                     |                |
| Military personnel                             | 29 (11.8)                              | 15 (19.0)              | 44 (13.6)          | 26 (5.6)                                  | 8 (9.2)                             | 34 (6.1)       |
| Non-commissioned officers                      | 132 (53.9)                             | 33 (41.8)              | 165 (50.9)         | 225 (48.2)                                | 32 (36.8)                           | 257 (46.4)     |
| Officers                                       | 84 (34.3)                              | 31 (39.2)              | 115 (35.5)         | 216 (46.3)                                | 47 (54.0)                           | 263 (47.5)     |
| Years of service (M (SD))                      |                                        |                        |                    |                                           |                                     |                |
| Years                                          | 22.25 (9.08)                           | 21.42 (9.92)           | 22.05 (9.28)       | 22.20 (9.62)                              | 20.11 (9.98)                        | 21.86 (9.70)   |
| <b>Mental health related context</b>           |                                        |                        |                    |                                           |                                     |                |
| Past or current (self-reported) mental illness |                                        |                        |                    |                                           |                                     |                |
| Past mental illness                            | 194 (79.2)                             | 62 (78.5)              | 256 (79.0)         | N/A                                       | N/A                                 | N/A            |
| Mental illness/substance abuse work related    |                                        |                        |                    |                                           |                                     |                |
| Yes                                            | 167 (68.2)                             | 48 (60.8)              | 215 (66.4)         | N/A                                       | N/A                                 | N/A            |
| Severity of symptoms                           |                                        |                        |                    |                                           |                                     |                |
| Mean severity (M, SD)                          | <b>7.38 (1.87)</b>                     | <b>6.01 (2.07)</b>     | <b>7.05 (2.01)</b> | N/A                                       | N/A                                 | N/A            |

*Note: Military personnel with mental illness were asked about their type of work and rank at the time their mental illness started.*

## Beliefs, attitudes, and needs regarding (non-)disclosure to a supervisor

Regarding beliefs and attitudes pro non-disclosure, personnel preferred to solve their own problems (73.8%with(w/)MI, 65.2% (without(w/o)MI)) and preferred privacy

1  
2  
3 (58.3%w/MI, 59.3%w/oMI). There were also high stigma related concerns, with personnel  
4 reporting they saw (would see) themselves as weak due to MI (52.5%w/MI, 26.4%w/oMI),  
5  
6 had concerns about negative career consequences (35.5%w/MI, 24.4%w/oMI) and fear of  
7  
8 social rejection (33.0%w/MI, 20.6%w/oMI). Only a minority reported that their supervisor  
9  
10 had negative attitudes towards MI (9.3%w/MI, 4.9%w/oMI).  
11  
12

13  
14  
15 As for beliefs and attitudes pro disclosure, the large majority indicated disclosure  
16  
17 would allow them to be their true and authentic self (95.7%w/MI, 91.2%w/oMI), and  
18  
19 believed disclosure was important due to the responsibility belonging to the nature of their  
20  
21 work (74.7%w/MI, 90.3%w/oMI). In addition, most reported that the military has good  
22  
23 policy for those who develop MI (72.2%w/MI, 87.9%w/oMI) and that generally supervisors  
24  
25 take MI seriously (82.4%w/MI, 87.7%w/oMI). Furthermore, personnel reported that it  
26  
27 matters for the disclosure decision whether MI influences occupational functioning  
28  
29 (69.8%w/MI, 74.7%w/oMI) and whether work accommodations are needed (43.5%w/MI,  
30  
31 62.8%w/oMI). Of those with MI who had disclosed, the majority indicated having had no  
32  
33 choice, with 69% needing treatment during work hours and 46.9% having to report sick. An  
34  
35 overview of all beliefs and attitudes can be found in Table 2.  
36  
37  
38

39  
40 As for needs regarding future disclosure to a supervisor, the highest need was  
41  
42 reported for supervisors who show understanding for MI (96.8%) and have life experience  
43  
44 (93.1%), and advice about the best way to disclose (when/where/how) (88.8%). An overview  
45  
46 of all needs can be found in Figure 1.  
47  
48  
49

50  
51 [PLEASE INSERT FIGURE 1 HERE]  
52  
53  
54  
55  
56  
57  
58  
59  
60

| Table 2. Beliefs and attitudes regarding disclosure to a supervisor for military personnel with and without mental illness. |                                        |                    |                   |                       |                   |              |                 |                                           |                              |                   |                                 |                   |              |                 |
|-----------------------------------------------------------------------------------------------------------------------------|----------------------------------------|--------------------|-------------------|-----------------------|-------------------|--------------|-----------------|-------------------------------------------|------------------------------|-------------------|---------------------------------|-------------------|--------------|-----------------|
|                                                                                                                             | Military personnel with mental illness |                    |                   |                       |                   |              |                 | Military personnel without mental illness |                              |                   |                                 |                   |              |                 |
|                                                                                                                             | Total (N=324)                          | Disclosure (N=245) |                   | Non-Disclosure (N=79) |                   | Difference   |                 | Total (N=554)                             | Disclosure intention (N=467) |                   | Non-disclosure intention (N=87) |                   | Difference   |                 |
|                                                                                                                             | N (%)                                  | N (%)              | M (SD)            | N (%)                 | M (SD)            | Z            | Sig.            | N (%)                                     | N (%)                        | M(SD)             | N (%)                           | M (SD)            | Z            | Sig.            |
| <b>Beliefs and attitudes pro disclosure</b>                                                                                 |                                        |                    |                   |                       |                   |              |                 |                                           |                              |                   |                                 |                   |              |                 |
| <b>Authenticity</b><br><i>Importance of being your true self.</i>                                                           | 310 (95.7)                             | 238 (97.1)         | 3.33 (.56)        | 72 (91.1)             | 3.20 (.63)        | -1.49        | .135            | 509 (91.2)                                | 430 (92.1)                   | 3.34 (.68)        | 79 (90.8)                       | 3.18 (.66)        | -2.32        | .020            |
| <b>Supervisor takes mental illness seriously</b><br><i>Supervisor who takes mental illness seriously.</i>                   | 267 (82.4)                             | 207 (84.5)         | 3.11 (.79)        | 60 (76.0)             | 2.90 (.61)        | -2.88        | .004            | <b>486 (87.7)</b>                         | <b>426 (91.2)</b>            | <b>3.28 (.74)</b> | <b>60 (69.0)</b>                | <b>2.83 (.78)</b> | <b>-5.42</b> | <b>&lt;.001</b> |
| <b>Responsibility</b><br><i>Disclosure important due to the responsibility associated with the nature of the work.</i>      | <b>242 (74.7)</b>                      | <b>209 (85.3)</b>  | <b>3.04 (.65)</b> | <b>33 (41.8)</b>      | <b>2.35 (.75)</b> | <b>-7.26</b> | <b>&lt;.001</b> | <b>500 (90.3)</b>                         | <b>438 (93.8)</b>            | <b>3.28 (.59)</b> | <b>62 (71.3)</b>                | <b>2.86 (.81)</b> | <b>-4.71</b> | <b>&lt;.001</b> |
| <b>Policy</b><br><i>Military has policy which provides good solutions for those with mental illness.</i>                    | 234 (72.2)                             | 179 (73.1)         | 2.81 (.79)        | 55 (69.6)             | 2.77 (.83)        | -.38         | .707            | <b>487 (87.9)</b>                         | <b>422 (90.4)</b>            | <b>3.09 (.55)</b> | <b>65 (74.7)</b>                | <b>2.79 (.70)</b> | <b>-3.86</b> | <b>&lt;.001</b> |
| <b>Effect on functioning</b><br><i>Importance of whether mental illness effects occupational functioning.</i>               | <b>226 (69.8)</b>                      | <b>193 (78.8)</b>  | <b>3.02 (.78)</b> | <b>33 (41.8)</b>      | <b>2.33 (.87)</b> | <b>-6.15</b> | <b>&lt;.001</b> | 414 (74.7)                                | 342 (73.2)                   | 2.79 (.75)        | 72 (82.8)                       | 2.98 (.68)        | -2.11        | .035            |
| <b>Be example</b><br><i>Wanting to be a good example to others.</i>                                                         | 146 (45.1)                             | 121 (49.4)         | 2.44 (.83)        | 25 (31.7)             | 2.18 (.69)        | -2.61        | .009            | <b>373 (67.3)</b>                         | <b>341 (73.0)</b>            | <b>2.88 (.73)</b> | <b>32 (36.8)</b>                | <b>2.23 (.80)</b> | <b>-6.85</b> | <b>&lt;.001</b> |
| <b>Work accommodations</b><br><i>Importance of needing work accommodations.</i>                                             | <b>141 (43.5)</b>                      | <b>129 (52.7)</b>  | <b>2.44 (.95)</b> | <b>12 (15.2)</b>      | <b>1.72 (.88)</b> | <b>-5.86</b> | <b>&lt;.001</b> | 348 (62.8)                                | 303 (64.9)                   | 2.68 (.75)        | 45 (51.7)                       | 2.51 (.83)        | -2.02        | .044            |
| <b>Advice others</b><br><i>The importance of advice from others for disclosure.</i>                                         | 62 (19.1)                              | 55 (22.5)          | 1.91 (.77)        | 7 (8.9)               | 1.63 (.64)        | -2.73        | .006            | 356 (64.3)                                | 302 (64.7)                   | 2.63 (.77)        | 54 (62.1)                       | 2.52 (.71)        | -1.24        | .216            |
| No choice, supervisor could see it.                                                                                         | 95 (N/A)                               | 95 (38.8)          | 2.23 (.89)        | N/A                   | N/A               | N/A          | N/A             | N/A                                       | N/A                          | N/A               | N/A                             | N/A               | N/A          | N/A             |
| No choice, I had to report sick.                                                                                            | 115 (N/A)                              | 115 (46.9)         | 2.39 (1.04)       | N/A                   | N/A               | N/A          | N/A             | N/A                                       | N/A                          | N/A               | N/A                             | N/A               | N/A          | N/A             |
| No choice, I needed treatment during work.                                                                                  | 169 (N/A)                              | 169 (69.0)         | 2.78 (.91)        | N/A                   | N/A               | N/A          | N/A             | N/A                                       | N/A                          | N/A               | N/A                             | N/A               | N/A          | N/A             |
| <b>Beliefs and attitudes pro non-disclosure</b>                                                                             |                                        |                    |                   |                       |                   |              |                 |                                           |                              |                   |                                 |                   |              |                 |
| <b>Self-management</b><br><i>The preference to solve one's own problems.</i>                                                | <b>239 (73.8)</b>                      | <b>170 (69.4)</b>  | <b>2.70 (.78)</b> | <b>69 (87.3)</b>      | <b>3.13 (.76)</b> | <b>-4.79</b> | <b>&lt;.001</b> | <b>361 (65.2)</b>                         | <b>284 (60.8)</b>            | <b>2.58 (.75)</b> | <b>77 (88.5)</b>                | <b>3.10 (.65)</b> | <b>-6.05</b> | <b>&lt;.001</b> |
| <b>Difficulty talking about mental illness</b><br><i>Finding it difficult to talk about mental illness.</i>                 | 214 (66.1)                             | 154 (62.9)         | 2.62 (.84)        | 60 (76.0)             | 2.86 (.80)        | -2.28        | .023            | <b>212 (38.3)</b>                         | <b>156 (33.4)</b>            | <b>2.20 (.76)</b> | <b>56 (64.4)</b>                | <b>2.76 (.78)</b> | <b>-5.93</b> | <b>&lt;.001</b> |
| <b>Preference privacy</b><br><i>Preference that mental illness remains private.</i>                                         | <b>189 (58.3)</b>                      | <b>124 (50.6)</b>  | <b>2.49 (.77)</b> | <b>65 (82.3)</b>      | <b>3.05 (.75)</b> | <b>-5.55</b> | <b>&lt;.001</b> | <b>328 (59.2)</b>                         | <b>252 (54.0)</b>            | <b>2.58 (.78)</b> | <b>76 (87.4)</b>                | <b>3.22 (.72)</b> | <b>-6.89</b> | <b>&lt;.001</b> |
| <b>Self-stigma</b><br><i>Seeing yourself as weak due to mental illness.</i>                                                 | 170 (52.5)                             | 125 (51.0)         | 2.44 (.96)        | 45 (57.0)             | 2.52 (.99)        | -.69         | .489            | <b>146 (26.4)</b>                         | <b>95 (20.3)</b>             | <b>1.90 (.74)</b> | <b>51 (58.6)</b>                | <b>2.49 (.79)</b> | <b>-6.46</b> | <b>&lt;.001</b> |
| <b>Shame</b><br><i>Being ashamed of the mental illness.</i>                                                                 | 159 (49.1)                             | 121 (49.4)         | 2.40 (.96)        | 38 (48.1)             | 2.47 (1.00)       | -.47         | .636            | <b>129 (23.3)</b>                         | <b>85 (18.2)</b>             | <b>1.89 (.71)</b> | <b>44 (50.6)</b>                | <b>2.39 (.84)</b> | <b>-5.41</b> | <b>&lt;.001</b> |
| <b>Gossip</b><br><i>Fearing gossip as result of disclosure.</i>                                                             | 124 (38.3)                             | 97 (39.6)          | 2.24 (.91)        | 27 (34.2)             | 2.18 (.89)        | -.60         | .547            | <b>118 (21.3)</b>                         | <b>72 (15.4)</b>             | <b>1.88 (.68)</b> | <b>46 (52.9)</b>                | <b>2.63 (.85)</b> | <b>-7.69</b> | <b>&lt;.001</b> |
| <b>Career concerns</b><br><i>Fearing negative career consequences as result of disclosure.</i>                              | 114 (35.2)                             | 86 (35.1)          | 2.11 (.94)        | 28 (35.4)             | 2.16 (.97)        | -.41         | .680            | <b>135 (24.4)</b>                         | <b>86 (18.4)</b>             | <b>1.90 (.73)</b> | <b>49 (56.3)</b>                | <b>2.55 (.89)</b> | <b>-6.57</b> | <b>&lt;.001</b> |



1  
2  
3  
4  
5  
6  
7  
8  
9  
10  
11  
12  
13  
14  
15  
16  
17  
18  
19  
20  
21  
22  
23  
24  
25  
26  
27  
28  
29  
30  
31  
32  
33  
34  
35  
36  
37  
38  
39  
40  
41  
42  
43  
44  
45  
46

|                                                                                                                 |            |           |            |           |            |       |      |            |           |            |           |            |       |       |
|-----------------------------------------------------------------------------------------------------------------|------------|-----------|------------|-----------|------------|-------|------|------------|-----------|------------|-----------|------------|-------|-------|
| <i>Unemployment.</i>                                                                                            | 35 (N/A)   | 28 (N/A)  | N/A        | 7 (N/A)   | N/A        | N/A   | N/A  | 28 (N/A)   | 19 (N/A)  | N/A        | 9 (N/A)   | N/A        | N/A   | N/A   |
| <i>Not being able to be promoted to future career steps.</i>                                                    | 83 (N/A)   | 62 (N/A)  | N/A        | 21 (N/A)  | N/A        | N/A   | N/A  | 94 (N/A)   | 61 (N/A)  | N/A        | 33 (N/A)  | N/A        | N/A   | N/A   |
| <i>Not being able to do work tasks anymore that one likes best.</i>                                             | 75 (N/A)   | 59 (N/A)  | N/A        | 16 (N/A)  | N/A        | N/A   | N/A  | 67 (N/A)   | 43 (N/A)  | N/A        | 24 (N/A)  | N/A        | N/A   | N/A   |
| <b>Social rejection</b><br><i>Fearing others will see you differently (negatively) as result of disclosure.</i> | 107 (33.0) | 83 (33.9) | 2.15 (.85) | 24 (30.4) | 2.10 (.84) | -.48  | .633 | 114 (20.6) | 71 (15.2) | 1.90 (.65) | 43 (49.4) | 2.47 (.82) | -6.35 | <.001 |
| <b>Discrimination</b><br><i>Fearing being treated differently (less well) as results of disclosure.</i>         | 92 (28.4)  | 69 (28.2) | 2.07 (.81) | 23 (29.1) | 2.06 (.82) | -.05  | .963 | 90 (16.3)  | 56 (12.0) | 1.83 (.64) | 34 (39.1) | 2.31 (.75) | -5.68 | <.001 |
| <b>Blame</b><br><i>Fearing others see mental illness as one's own fault.</i>                                    | 87 (26.9)  | 63 (25.7) | 1.99 (.83) | 24 (30.4) | 2.04 (.91) | -.27  | .785 | 52 (9.4)   | 33 (7.1)  | 1.65 (.62) | 19 (21.8) | 1.95 (.73) | -3.68 | <.001 |
| <b>Confidentiality concern</b><br><i>Fearing that supervisor would not treat disclosure confidentially.</i>     | 82 (25.3)  | 52 (21.2) | 1.93 (.81) | 30 (38.0) | 2.24 (.99) | -2.42 | .016 | 92 (16.6)  | 46 (9.9)  | 1.71 (.65) | 46 (52.9) | 2.54 (.91) | -8.14 | <.001 |
| <b>Negative attitude supervisor</b><br><i>Supervisor is negative about mental illness.</i>                      | 30 (9.3)   | 22 (9.0)  | 1.69 (.72) | 8 (10.1)  | 1.76 (.70) | -.97  | .330 | 27 (4.9)   | 11 (2.4)  | 1.52 (.58) | 16 (18.4) | 1.98 (.70) | -5.95 | <.001 |
| No choice, supervisor already heard from someone else.                                                          | 5 (N/A)    | N/A       | N/A        | 5 (6.3)   | 1.55 (.62) | N/A   | N/A  | N/A        | N/A       | N/A        | N/A       | N/A        | N/A   | N/A   |

Note: A Bonferroni correction was used, with  $\alpha = .05/20 = .003$   
 Note: For comparison between disclosure intentions of military personnel without mental illness, 'very-unlikely' and 'unlikely' were combined, just as 'likely' and 'very-likely'.

review only

### **Differences between disclosers and non-disclosers**

Overall, those who did not (intend to) disclose, reported significantly higher preference for solving own problems and for privacy, and lower feelings of responsibility due to the nature of their work.

Within personnel with MI, those who had not disclosed also reported MI having less effect on their occupational functioning, and less need for work accommodations compared to disclosers.

Within personnel without MI, those who intended to disclose and those who did not, differed significantly on all beliefs and attitudes pro non-disclosure. For beliefs and attitudes pro disclosure, those with no intention to disclose indicated significantly lower belief that the military has good policy for those with MI, supervisors taking MI less seriously, and a lower desire to be a good example to others with MI. Results with statistics can be found in Table 2. There were no significant differences in reported needs for future disclosure, based on disclosure intention.

### **Factors associated with non-disclosure to a supervisor**

For personnel with MI, the logistic regression model with the dependent variable non-disclosure, was statistically significant ( $\chi^2(24)=149.30, p<.001$ ) and explained 55.0% (Nagelkerke  $R^2$ ) of the variance in non-disclosure. The following variables were significantly associated with non-disclosure: (1) lower symptom severity, (2) having a partner, (3) lower employee-supervisor relationship quality, (4) less importance given to disclosure advice from others, (5) MI having less impact on occupational functioning, (6) lower feeling of responsibility due to the nature of work, (7) higher preference for privacy, (8) higher privacy for self-management, and (9) higher stigma related concerns.

1  
2  
3 For personnel without MI, the ordinal logistic regression model with the dependent  
4 variable non-disclosure intention, was statistically significant ( $\chi^2(23)=346.90, p<.001$ ) and  
5 explained 53.5% (Nagelkerke  $R^2$ ) of the variance in non-disclosure intention. The following  
6 variables were significantly associated with non-disclosure intention: (1)not having positive  
7 earlier experience with disclosing something personal to a supervisor, (2)having seen  
8 negative experiences of others with disclosure, (3)lower employee-supervisor relationship  
9 quality, (4)a supervisor who takes MI less seriously, (5)lower importance given to possible  
10 work accommodations, (6)lower importance given to being able to be authentic, (7)lower  
11 importance to wanting to be an example to others with MI, (8)higher preference for privacy,  
12 (9)higher preference for self-management, (10)higher stigma related concerns and (11)  
13 finding it more difficult to talk about MI. All results with statistics can be found in Table 3.  
14  
15  
16  
17  
18  
19  
20  
21  
22  
23  
24  
25  
26  
27  
28  
29  
30  
31  
32  
33  
34  
35  
36  
37  
38  
39  
40  
41  
42  
43  
44  
45  
46  
47  
48  
49  
50  
51  
52  
53  
54  
55  
56  
57  
58  
59  
60

**Table 3. Logistic and ordinal regressions for the non-disclosure decision and intention to a supervisor.**

|                                                 | Military personnel with mental illness<br>(0=disclosure, 1=non-disclosure) |            |              |             |                     |                 | Military personnel without mental illness<br>(Disclosure 1=very likely, 2=likely, 3=(very)unlikely) |             |              |             |                       |                 |
|-------------------------------------------------|----------------------------------------------------------------------------|------------|--------------|-------------|---------------------|-----------------|-----------------------------------------------------------------------------------------------------|-------------|--------------|-------------|-----------------------|-----------------|
|                                                 | B                                                                          | SE         | Wald         | OR          | CI 95%              | Sig.            | B                                                                                                   | SE          | Wald         | OR          | CI 95%                | Sig.            |
| Constant                                        | 4.23                                                                       | 2.44       | 3.01         | 68.71       | N/A                 | .083            | N/A                                                                                                 | N/A         | N/A          | N/A         | N/A                   | N/A             |
| Threshold: = 3 ((very) unlikely)                | N/A                                                                        | N/A        | N/A          | N/A         | N/A                 | N/A             | <b>-8.63</b>                                                                                        | <b>1.61</b> | <b>28.74</b> | <b>.00</b>  | <b>[7.62E-6 -.00]</b> | <b>&lt;.001</b> |
| Threshold: = 2 (likely)                         | N/A                                                                        | N/A        | N/A          | N/A         | N/A                 | N/A             | <b>-5.15</b>                                                                                        | <b>1.57</b> | <b>10.74</b> | <b>.01</b>  | <b>[-.00-.13]</b>     | <b>.001</b>     |
| <b>Health</b>                                   |                                                                            |            |              |             |                     |                 |                                                                                                     |             |              |             |                       |                 |
| <b>Higher symptom severity</b>                  | <b>-.33</b>                                                                | <b>.10</b> | <b>12.27</b> | <b>.72</b>  | <b>[-.59-.86]</b>   | <b>&lt;.001</b> | N/A                                                                                                 | N/A         | N/A          | N/A         | N/A                   | N/A             |
| <b>Demographics and experience</b>              |                                                                            |            |              |             |                     |                 |                                                                                                     |             |              |             |                       |                 |
| Gender (female, vs. male)                       | -.08                                                                       | .56        | .02          | .92         | [.31-2.76]          | .882            | -.52                                                                                                | .38         | 1.87         | .60         | [-.28-1.25]           | .172            |
| Marital status (partner, vs. single)            | <b>1.27</b>                                                                | <b>.54</b> | <b>5.52</b>  | <b>3.58</b> | <b>[1.24-10.36]</b> | <b>.019</b>     | -.18                                                                                                | .28         | .42          | .84         | [-.48-1.44]           | .518            |
| Higher age                                      | -.19                                                                       | .19        | .93          | .83         | [-.57-1.21]         | .336            | -.13                                                                                                | .10         | 1.66         | .88         | [-.72-1.07]           | .197            |
| More familiarity with mental illness            | .10                                                                        | .12        | .64          | 1.10        | [.87-1.39]          | .424            | -.14                                                                                                | .07         | 3.73         | .87         | [-.76-1.00]           | .054            |
| Earlier experience disclosing to a supervisor   |                                                                            |            |              |             |                     |                 |                                                                                                     |             |              |             |                       |                 |
| Negative                                        | -.86                                                                       | .75        | 1.34         | .42         | [.10-1.83]          | .248            | -.41                                                                                                | .76         | .30          | .66         | [-.15-2.93]           | .586            |
| Positive                                        | -.72                                                                       | .70        | 1.07         | .49         | [.12-1.91]          | .301            | <b>-.54</b>                                                                                         | <b>.25</b>  | <b>4.68</b>  | <b>.59</b>  | <b>[-.36-.95]</b>     | <b>.031</b>     |
| None                                            | 0                                                                          | 0          | 2.22         | 0           | 0                   | .329            | 0                                                                                                   | 0           | 0            | 1           | 0                     | 0               |
| Seen experience of others with disclosure       |                                                                            |            |              |             |                     |                 |                                                                                                     |             |              |             |                       |                 |
| Negative                                        | .29                                                                        | .59        | .24          | 1.34        | [.42-4.24]          | .623            | <b>1.12</b>                                                                                         | <b>.38</b>  | <b>8.52</b>  | <b>3.07</b> | <b>[1.45-6.52]</b>    | <b>.004</b>     |
| Positive                                        | .40                                                                        | .54        | .55          | 1.49        | [-.52-4.29]         | .458            | -.09                                                                                                | .21         | .18          | .92         | [-.61-1.38]           | .672            |
| None                                            | 0                                                                          | 0          | .68          | 0           | 0                   | .713            | 0                                                                                                   | 0           | 0            | 1           | 0                     | 0               |
| <b>Work context</b>                             |                                                                            |            |              |             |                     |                 |                                                                                                     |             |              |             |                       |                 |
| Rank                                            | -.29                                                                       | .29        | 1.05         | .75         | [.43-1.31]          | .305            | .31                                                                                                 | .17         | 3.           | 3.18        | [-.97-1.90]           | .074            |
| Unit cohesion                                   | .17                                                                        | .23        | .55          | 1.19        | [-.76-1.86]         | .459            | -.02                                                                                                | .13         | .03          | .98         | [-.75-1.27]           | .870            |
| Relationship quality supervisor                 | <b>-.76</b>                                                                | <b>.32</b> | <b>5.73</b>  | <b>.47</b>  | <b>[-.25-.87]</b>   | <b>.017</b>     | <b>-1.39</b>                                                                                        | <b>.27</b>  | <b>27.14</b> | <b>.25</b>  | <b>[-.15-.42]</b>     | <b>&lt;.001</b> |
| <b>Beliefs and attitudes</b>                    |                                                                            |            |              |             |                     |                 |                                                                                                     |             |              |             |                       |                 |
| <b>Pro disclosure</b>                           |                                                                            |            |              |             |                     |                 |                                                                                                     |             |              |             |                       |                 |
| Supervisor takes mental illness seriously       | -.09                                                                       | .32        | .07          | .92         | [-.50-1.70]         | .787            | <b>-.45</b>                                                                                         | <b>.14</b>  | <b>9.63</b>  | <b>.64</b>  | <b>[-.48-.85]</b>     | <b>.002</b>     |
| Importance advice others for disclosure         | <b>-.57</b>                                                                | <b>.29</b> | <b>3.94</b>  | <b>.56</b>  | <b>[-.32-.99]</b>   | <b>.047</b>     | -.18                                                                                                | .14         | 1.65         | .84         | [-.64-1.10]           | .199            |
| Mental illness effects occupational functioning | <b>-.90</b>                                                                | <b>.27</b> | <b>10.93</b> | <b>.41</b>  | <b>[-.24-.69]</b>   | <b>.001</b>     | -.10                                                                                                | .15         | .39          | .91         | [-.68-1.22]           | .531            |
| Responsibility due to nature of work            | <b>-1.12</b>                                                               | <b>.29</b> | <b>14.79</b> | <b>.33</b>  | <b>[-.19-.58]</b>   | <b>&lt;.001</b> | -.24                                                                                                | .17         | 1.98         | .79         | [-.56-1.10]           | .159            |
| Work accommodations are needed                  | -.40                                                                       | .24        | 2.84         | .67         | [.42-1.07]          | .092            | <b>-.35</b>                                                                                         | <b>.14</b>  | <b>6.36</b>  | <b>.71</b>  | <b>[-.54-.93]</b>     | <b>.012</b>     |
| Attitude that the military has good policy      | .27                                                                        | .24        | 1.30         | 1.31        | [.82-2.09]          | .254            | -.37                                                                                                | .19         | 3.65         | .69         | [-.47-1.01]           | .056            |
| Wanting to be authentic                         | .04                                                                        | .34        | .01          | 1.04        | [-.53-2.03]         | .918            | <b>-.50</b>                                                                                         | <b>.15</b>  | <b>11.33</b> | <b>.61</b>  | <b>[-.46-.81]</b>     | <b>.001</b>     |
| Wanting to be example to others                 | -.13                                                                       | .26        | .25          | .88         | [-.53-1.46]         | .619            | <b>-.37</b>                                                                                         | <b>.15</b>  | <b>6.59</b>  | <b>.69</b>  | <b>[-.52-.92]</b>     | <b>.010</b>     |
| <b>Pro non-disclosure</b>                       |                                                                            |            |              |             |                     |                 |                                                                                                     |             |              |             |                       |                 |
| Preference for privacy                          | .71                                                                        | .31        | 5.40         | 2.05        | [1.12-3.76]         | .020            | .69                                                                                                 | .15         | 22.51        | 1.99        | [1.50-2.65]           | <.001           |
| Preference self-management                      | <b>.58</b>                                                                 | <b>.30</b> | <b>3.87</b>  | <b>1.79</b> | <b>[1.00-3.20]</b>  | <b>.049</b>     | .49                                                                                                 | .16         | 9.57         | 1.64        | [1.20-2.23]           | .002            |
| Stigma related concerns                         | .79                                                                        | .40        | 4.00         | 2.21        | [1.02-4.79]         | .046            | .56                                                                                                 | .23         | 5.93         | 1.76        | [1.12-2.77]           | .015            |
| Difficulty talking about mental illness         | .02                                                                        | .29        | .00          | 1.02        | [-.57-1.81]         | .952            | .41                                                                                                 | .15         | 7.51         | 1.51        | [1.13-2.03]           | .006            |

*Note: Earlier experiences, both own and others, were each represented as three dummy variables with 'none' serving as the reference group.*

## Discussion

The current study aimed to examine beliefs, attitudes, and needs associated with (non-)disclosure to a supervisor in the military. Non-disclosure was associated with higher stigma related concerns, a higher preference for privacy and self-management, and a lower supervisor-employee relationship. A quarter of personnel with MI had not disclosed their MI to their supervisor, and those who had disclosed, appeared to do so after a considerable delay. Important reasons for disclosure were that personnel wanted to be their true and authentic self and thought disclosure was important due to the responsible nature of their work. To consider disclosure, most respondents indicated they would need a supervisor who shows understanding for MI. Moreover, over 80% expressed a need for advice about the best ways to disclose.

We identified that although the majority of personnel with MI had disclosed to their supervisor, they appeared to do so after a considerable delay. Those who disclosed had higher symptom severity than non-disclosers and the majority disclosed because they had to call in sick (46.9%) or had needed treatment during work hours (69.0%). This appears to be even more so the case for military personnel, compared to civilians. A study on disclosure among Dutch workers in general showed that 15.6% disclosed due to having to report sick, and 39.9% disclosed due to needing treatment during work (29). This is in line with ‘the model of employee decision-making about disclosure of a mental disorder at work’, which proposes a default position of non-disclosure and that a triggering incident is needed for disclosure – in this case, having to call in sick or needing treatment (16). This late disclosure causes missed opportunities for workplace support and work accommodations which can prevent worsened symptoms and sick leave (1, 30, 31).

Stigma related concerns form a barrier for (early-)disclosure. Half of those who had not disclosed, saw themselves as weak for having MI, experienced shame, and a third feared

1  
2  
3 gossip, negative career consequences, social rejection and discrimination. These stigma  
4  
5 related concerns were significantly associated both with non-disclosure intentions and  
6  
7 decisions. Stigma has been found to be a barrier to disclosure before, both in military, other  
8  
9 trauma-prone occupations, and civilian populations (5, 6, 16, 32, 33). However, concerns  
10  
11 about stigma appear to be stronger within the military setting. For example, of military  
12  
13 personnel who had not disclosed, half reported seeing themselves as weak and being  
14  
15 ashamed, compared to only 13.5% of civilians (29). These higher concerns of stigma are  
16  
17 likely caused by the military workplace culture and the responsible work nature, where  
18  
19 people are expected to be 'strong' (6, 8). It should be noted that the study among civilians  
20  
21 predominantly included females, while the current study predominantly included males,  
22  
23 which might also account for some of the differences (29). Future research into  
24  
25 destigmatizing interventions is needed, as up to now only a few, especially in the military,  
26  
27 rigorous destigmatizing intervention studies have been conducted (1). Trauma risk  
28  
29 management (TRiM) is a promising destigmatizing program within (military) organizational  
30  
31 settings, as it has shown to improve attitudes towards MI (34). To facilitate disclosure, stigma  
32  
33 should also be targeted as a policy level, to take away some of the fears personnel face (6).  
34  
35  
36  
37  
38  
39

40 The preference for self-management also forms a barrier for (early-)disclosure.  
41  
42 Although disclosure rates are comparable to earlier research among Dutch workers in general  
43  
44 (22, 29), the reasons for non-disclosure differ. Of the non-disclosers, 87.3% reported a  
45  
46 preference for self-management, compared to 44.9% of civilians. This is likely also caused  
47  
48 by the military workplace culture, where people are expected to have a 'can-do' problem  
49  
50 fixing mentality (6). To target this preference for self-management, self-help apps or personal  
51  
52 recovery programs could provide personnel the opportunity to manage their own MI, possibly  
53  
54 giving them more confidence in disclosure and a feeling of control, as they are already  
55  
56 working on their MI (35). This could also be done through easily accessible care from for  
57  
58  
59  
60

1  
2  
3 example a social worker. Additionally, decision aids and programs could be implemented, as  
4  
5 personnel indicated this as a need, and it can positively influence sustainable employability  
6  
7 and coping with stigma (36-39).  
8  
9

10 To facilitate (early-)disclosure, there is an important role for the supervisor. The  
11  
12 results show that lower employee-supervisor relationship quality is associated both with non-  
13  
14 disclosure decision and intention. Having seen negative experiences of others with disclosure,  
15  
16 was the second strongest predictor of non-disclosure intentions, indicating the importance of  
17  
18 how others, including supervisors, respond to disclosure. It is also important that military  
19  
20 personnel with positive experiences with disclosure, communicate openly about these  
21  
22 experiences. The previous qualitative study in the Dutch military (6), and a study among  
23  
24 Dutch workers in general (29), also showed the importance of supervisor relationships and  
25  
26 support (6). Supervisor attitudes towards MI and knowledge of MI have also been found to  
27  
28 be associated with whether employees disclose to the supervisor themselves, or that the  
29  
30 supervisor finds out some other way (40). Finally, supervisor support was not only found to  
31  
32 be important for disclosure, but also for treatment seeking for MI, a decision which is also of  
33  
34 influence on sustainable employability (10). To facilitate (early-)disclosure, training may be  
35  
36 needed for supervisors to improve understanding and support of MI needs (41). Additionally,  
37  
38 supervisor relationship quality could be addressed, for example by adjusting the obligated job  
39  
40 rotation every 3 years, giving personnel longer to build a relationship with their supervisor.  
41  
42  
43  
44  
45  
46  
47

### 48 **Strengths and limitations**

49

50 The strength of this study is the large sample and inclusion of a group that is usually  
51  
52 hard to study (participants who have not disclosed). Additionally, the study includes both  
53  
54 personnel with and without MI, providing insights for interventions for personnel who may  
55  
56 develop MI in the future. Finally, the study examines disclosure in the military where little  
57  
58 research has been done on this topic.  
59  
60

1  
2  
3 As for limitations, the sample is not representative for the entire military, due to the  
4 sampling method. This method also caused the sample to include only personnel who have  
5 been on deployment. This group might have more positive attitudes towards MI and  
6 disclosure due to mental health training related to deployment (34). Also, despite  
7 stratification, the current study included a sample of older, higher educated, and higher-  
8 ranking personnel. Comparisons showed that lower ranking and lower educated personnel  
9 were less likely to have completed the questionnaire once started. Majority of dropouts  
10 occurred during the mental health questions. Possibly these questions were hard to answer, or  
11 there were anonymity concerns. Additionally, drop-out might have been higher due to the use  
12 of forced response. Previous research has shown that younger and lower educated workers  
13 disclosed less (29), so disclosure rates in the current study might be an overestimation of the  
14 true rates. Also, due to the cross-sectional design of the study, no causality can be presumed.  
15  
16  
17  
18  
19  
20  
21  
22  
23  
24  
25  
26  
27  
28  
29  
30  
31  
32

### 33 **Conclusion**

34  
35 To better facilitate (early-)disclosure of MI to a supervisor, there is a need for several  
36 changes within the military. First, destigmatizing interventions and policies are needed to  
37 create a culture change where personnel do not feel shame for having MI, and do not have to  
38 fear that stigma and discrimination negatively affect their careers and wellbeing at work.  
39  
40 Second, offered early interventions should align with the preference for self-management.  
41  
42 Third, our results strongly suggest a need to train supervisors to recognize, and effectively  
43 communicate with, personnel with MI and to improve employee-supervisor relationships.  
44  
45 Together this could facilitate (early-)disclosure which may optimize opportunities for the  
46 provision of workplace support and accommodations, which in turn can increase the chance  
47 of recovery and sustainable employment.  
48  
49  
50  
51  
52  
53  
54  
55  
56  
57  
58  
59  
60



## Acknowledgements

We thank the people who participated in this study and shared their personal experiences with us, giving us insight into this important topic. We also thank the providers of the funding for this research, the IMPACT PhD Program 2018 of Tilburg University and a grant from the Dutch Ministry of Defence. Finally, we thank the military research department, and especially Jolanda Snijders, who helped with participant recruitment.

## Data Availability

The data that support the findings of this study are available upon reasonable request from the corresponding author, R.I. Bogaers.

## Funding

This work was mainly supported by the IMPACT PhD Program 2018 of Tilburg University (no grant number). Additionally, the work was partially supported by a grant from the Dutch Ministry of Defence (no grant number), but this grant did not influence the interpretation of the data; the writing of the paper; or the decision to submit the paper for publication. These funding sources were not involved in study design; analysis and interpretation of data; writing of the report; and in the decision to submit the article for publication.

## Competing interests

**R.I. Bogaers** reports grants from The Dutch Ministry of Defence, during the conduct of the study. However, this did not influence the interpretation of the data or the decision to submit the paper for publication. **Dr. Geuze** has nothing to disclose. **Prof. Greenberg** is the Royal College of Psychiatrists Lead for Trauma and the Military; however, all views expressed are his own. **Dr. Leijten** is an employee at the Ministry of Defence but this did not influence the

1  
2  
3 interpretation of the data or the decision to submit the paper for publication. **Prof. van**  
4  
5 **Weeghel** has nothing to disclose. **Prof. van de Mheen** has nothing to disclose. **Dr. Rozema**  
6  
7 has nothing to disclose. **Prof. Brouwers** reports grants from The Dutch Ministry of Defence,  
8  
9 during the conduct of the study. However, this did not influence the interpretation of the data  
10  
11 or the decision to submit the paper for publication.  
12  
13  
14  
15  
16

### 17 **Author contributions**

18  
19 **R.I. Bogaers:** As the PhD student on the project, R.I. Bogaers was involved in all aspects of  
20  
21 the study. **S.G. Geuze:** Was involved by advising R.I. Bogaers during the formulating of  
22  
23 research question(s) and designing the study. Also, he provided multiple rounds of feedback  
24  
25 on the manuscript of the paper. **N. Greenberg:** Was involved by advising R.I. Bogaers  
26  
27 during designing the study and provided one critical round of feedback on the manuscript of  
28  
29 the paper. **F.R.M. Leijten:** Was involved by advising R.I. Bogaers during the formulating of  
30  
31 research question(s) and designing the study and provided one critical round of feedback on  
32  
33 the manuscript of the paper. **J. van Weeghel:** Was involved by advising R.I. Bogaers during  
34  
35 the formulating of research question(s) and designing the study. Also, he provided multiple  
36  
37 rounds of feedback on the manuscript of the paper. **H. van de Mheen:** Was involved by  
38  
39 advising R.I. Bogaers during the formulating of research question(s) and designing the study  
40  
41 and provided one critical round of feedback on the manuscript of the paper. **A.D. Rozema:**  
42  
43 Was involved by advising R.I. Bogaers during the formulating of research question(s) and  
44  
45 designing the study and provided one critical round of feedback on the manuscript of the  
46  
47 paper. **E.P.M. Brouwers: Project leader who wrote the research proposal.** Was involved  
48  
49 by advising R.I. Bogaers during the formulating of research question(s) and designing the  
50  
51 study. Provided multiple rounds of critical feedback on the manuscript of the paper.  
52  
53  
54  
55  
56  
57  
58  
59  
60

## References

1. Brouwers EP. Social stigma is an underestimated contributing factor to unemployment in people with mental illness or mental health issues: position paper and future directions. *BMC psychology*. 2020;8(1):1-7.
2. Jones AM. Disclosure of mental illness in the workplace: A literature review. *American Journal of Psychiatric Rehabilitation*. 2011;14(3):212-29.
3. Brohan E, Henderson C, Wheat K, Malcolm E, Clement S, Barley EA, et al. Systematic review of beliefs, behaviours and influencing factors associated with disclosure of a mental health problem in the workplace. *BMC psychiatry*. 2012;12(1):11.
4. van Beukering I, Smits S, Janssens K, Bogaers R, Joosen M, Bakker M, et al. In What Ways Does Health Related Stigma Affect Sustainable Employment and Well-Being at Work? A Systematic Review. *Journal of Occupational Rehabilitation*. 2021:1-15.
5. Brouwers E, Joosen M, van Zelst C, Van Weeghel J. To Disclose or Not to Disclose: A Multi-stakeholder Focus Group Study on Mental Health Issues in the Work Environment. *Journal of occupational rehabilitation*. 2019:1-9.
6. Bogaers R, Geuze E, van Weeghel J, Leijten F, Rüsç N, van de Mheen D, et al. Decision (not) to disclose mental health conditions or substance abuse in the work environment: a multiperspective focus group study within the military. *BMJ Open*. 2021;11(10):e049370.
7. Gignac MA, Jetha A, Ginis KAM, Ibrahim S. Does it matter what your reasons are when deciding to disclose (or not disclose) a disability at work? The association of workers' approach and avoidance goals with perceived positive and negative workplace outcomes. *Journal of Occupational Rehabilitation*. 2021:1-14.
8. Stergiou-Kita M, Mansfield E, Bezo R, Colantonio A, Garritano E, Lafrance M, et al. Danger zone: Men, masculinity and occupational health and safety in high risk occupations. *Safety science*. 2015;80:213-20.
9. van der Wal SJ, Gorter R, Reijnen A, Geuze E, Vermetten E. Cohort profile: The prospective research in stress-related military operations (PRISMO) study in the Dutch armed forces. *BMJ open*. 2019;9(3):e026670.
10. Bogaers R, Geuze E, van Weeghel J, Leijten F, van de Mheen D, Varis P, et al. Barriers and facilitators for treatment-seeking for mental health conditions and substance misuse: multi-perspective focus group study within the military. *BJPsych Open*. 2020;6(6).
11. Rüsç N, Rose C, Holzhausen F, Mulfinger N, Krumm S, Corrigan PW, et al. Attitudes towards disclosing a mental illness among German soldiers and their comrades. *Psychiatry research*. 2017;258:200-6.
12. Bogaers R, Geuze E, Greenberg N, Leijten F, Varis P, van Weeghel J, et al. Seeking treatment for mental illness and substance abuse: a cross-sectional study on attitudes, beliefs, and needs of military personnel with and without mental illness. *Journal of psychiatric research*. 2022.
13. Hastuti R, Timming AR. An inter-disciplinary review of the literature on mental illness disclosure in the workplace: implications for human resource management. *The International Journal of Human Resource Management*. 2021:1-37.
14. Toth KE, Yvon F, Villotti P, Lecomte T, Lachance J-P, Kirsh B, et al. Disclosure dilemmas: how people with a mental health condition perceive and manage disclosure at work. *Disability and Rehabilitation*. 2021:1-11.
15. Stratton E, Einboden R, Ryan R, Choi I, Harvey SB, Glozier N. Deciding to Disclose a Mental Health Condition in Male Dominated Workplaces; a Focus-Group Study. *Frontiers in psychiatry*. 2018;9.

16. Toth KE, Dewa CS. Employee decision-making about disclosure of a mental disorder at work. *Journal of occupational rehabilitation*. 2014;24(4):732-46.
17. Von Elm E, Altman DG, Egger M, Pocock SJ, Gøtzsche PC, Vandenbroucke JP. The Strengthening the Reporting of Observational Studies in Epidemiology (STROBE) statement: guidelines for reporting observational studies. *Bulletin of the World Health Organization*. 2007;85:867-72.
18. Smarr KL, Keefer AL. Measures of depression and depressive symptoms: beck depression inventory-II (BDI-II), Center for Epidemiologic Studies Depression Scale (CES-D), geriatric depression scale (GDS), hospital anxiety and depression scale (HADS), and patient health Questionnaire-9 (PHQ-9). *Arthritis care & research*. 2011;63(S11):S454-S66.
19. Ali R, Meena S, Eastwood B, Richards I, Marsden J. Ultra-rapid screening for substance-use disorders: the Alcohol, Smoking and Substance Involvement Screening Test (ASSIST-Lite). *Drug and alcohol dependence*. 2013;132(1-2):352-61.
20. Bradley KA, DeBenedetti AF, Volk RJ, Williams EC, Frank D, Kivlahan DR. AUDIT-C as a brief screen for alcohol misuse in primary care. *Alcoholism: Clinical and Experimental Research*. 2007;31(7):1208-17.
21. Weathers FW, Litz BT, Keane TM, Palmieri PA, Marx BP, Schnurr PP. The ptsd checklist for dsm-5 (pcl-5). Scale available from the National Center for PTSD at [www.ptsd.va.gov](http://www.ptsd.va.gov). 2013;10.
22. Dewa CS, Van Weeghel J, Joosen MC, Brouwers EP. What Could Influence Workers' Decisions to Disclose a Mental Illness at Work? *The international journal of occupational and environmental medicine*. 2020;11(3):119.
23. Janssens KM, van Weeghel J, Dewa C, Henderson C, Mathijssen JJ, Joosen MC, et al. Line managers' hiring intentions regarding people with mental health problems: a cross-sectional study on workplace stigma. *Occupational and Environmental Medicine*. 2021.
24. Holmes EP, Corrigan PW, Williams P, Canar J, Kubiak MA. Changing attitudes about schizophrenia. *Schizophrenia bulletin*. 1999;25(3):447-56.
25. van Boekel LC, Brouwers EP, van Weeghel J, Garretsen HF. Comparing stigmatising attitudes towards people with substance use disorders between the general public, GPs, mental health and addiction specialists and clients. *International Journal of Social Psychiatry*. 2015;61(6):539-49.
26. Wright KM, Cabrera OA, Bliese PD, Adler AB, Hoge CW, Castro CA. Stigma and barriers to care in soldiers postcombat. *Psychological Services*. 2009;6(2):108.
27. Gorgievski M, Peeters P, Rietzschel E, Bipp T. Betrouwbaarheid en Validiteit van de Nederlandse vertaling van de Work Design Questionnaire. *Gedrag en Organisatie*. 2016;29(3):273-301.
28. Kim PY, Thomas JL, Wilk JE, Castro CA, Hoge CW. Stigma, barriers to care, and use of mental health services among active duty and National Guard soldiers after combat. *Psychiatric Services*. 2010;61(6):582-8.
29. Dewa CS, van Weeghel J, Joosen MC, Gronholm PC, Brouwers EP. Workers' decisions to disclose a mental health issue to managers and the consequences. *Frontiers in psychiatry*. 2021;12.
30. Coleman S, Stevelink S, Hatch S, Denny J, Greenberg N. Stigma-related barriers and facilitators to help seeking for mental health issues in the armed forces: a systematic review and thematic synthesis of qualitative literature. *Psychological medicine*. 2017;47(11):1880-92.
31. van Hees SG, Carlier BE, Vossen E, Blonk RW, Oomens S. Towards a better understanding of work participation among employees with common mental health problems: a systematic realist review. *Scandinavian Journal of Work, Environment & Health*.

- 1  
2  
3 32. van Beukering IE, Bakker M, Corrigan PW, Gürbüz S, Bogaers RI, Janssens KME, et  
4 al. Expectations of Mental Illness Disclosure Outcomes in the Work Context: A Cross-  
5 Sectional Study Among Dutch Workers. *Journal of Occupational Rehabilitation*. 2022.  
6  
7 33. Stuart H. Mental Illness Stigma Expressed by Police to Police. *The Israel journal of*  
8 *psychiatry and related sciences*. 2017;54(1):18-23.  
9  
10 34. Gould M, Greenberg N, Hetherton J. Stigma and the military: evaluation of a PTSD  
11 psychoeducational program. *Journal of Traumatic Stress: Official Publication of The*  
12 *International Society for Traumatic Stress Studies*. 2007;20(4):505-15.  
13  
14 35. Cook JA, Copeland ME, Floyd CB, Jonikas JA, Hamilton MM, Razzano L, et al. A  
15 randomized controlled trial of effects of Wellness Recovery Action Planning on depression,  
16 anxiety, and recovery. *Psychiatric Services*. 2012;63(6):541-7.  
17  
18 36. Henderson C, Brohan E, Clement S, Williams P, Lassman F, Schauman O, et al.  
19 Decision aid on disclosure of mental health status to an employer: feasibility and outcomes of  
20 a randomised controlled trial. *The British Journal of Psychiatry*. 2013;203(5):350-7.  
21  
22 37. Rüsç N, Kösters M. Honest, Open, Proud to support disclosure decisions and to  
23 decrease stigma's impact among people with mental illness: Conceptual review and meta-  
24 analysis of program efficacy. *Social psychiatry and psychiatric epidemiology*. 2021:1-14.  
25  
26 38. Scior K, Rüsç N, White C, Corrigan PW. Supporting mental health disclosure  
27 decisions: the Honest, Open, Proud programme. *The British Journal of Psychiatry*.  
28 2020;216(5):243-5.  
29  
30 39. Stratton E, Choi I, Hickie I, Henderson C, Harvey SB, Glozier N. Web-based decision  
31 aid tool for disclosure of a mental health condition in the workplace: a randomised controlled  
32 trial. *Occupational and Environmental Medicine*. 2019;76(9):595-602.  
33  
34 40. Bertilsson M, Klinkhammer S, Staland-Nyman C, de Rijk A. How Managers Find  
35 Out About Common Mental Disorders Among Their Employees. *Journal of Occupational*  
36 *and Environmental Medicine*. 2021;63(11):975-84.  
37  
38 41. Gayed A, Milligan-Saville JS, Nicholas J, Bryan BT, LaMontagne AD, Milner A, et  
39 al. Effectiveness of training workplace managers to understand and support the mental health  
40 needs of employees: a systematic review and meta-analysis. *Occup Environ Med*.  
41 2018;75(6):462-70.  
42  
43  
44  
45  
46  
47  
48  
49  
50  
51  
52  
53  
54  
55  
56  
57  
58  
59  
60

Figure 1. Needs for (future) disclosure

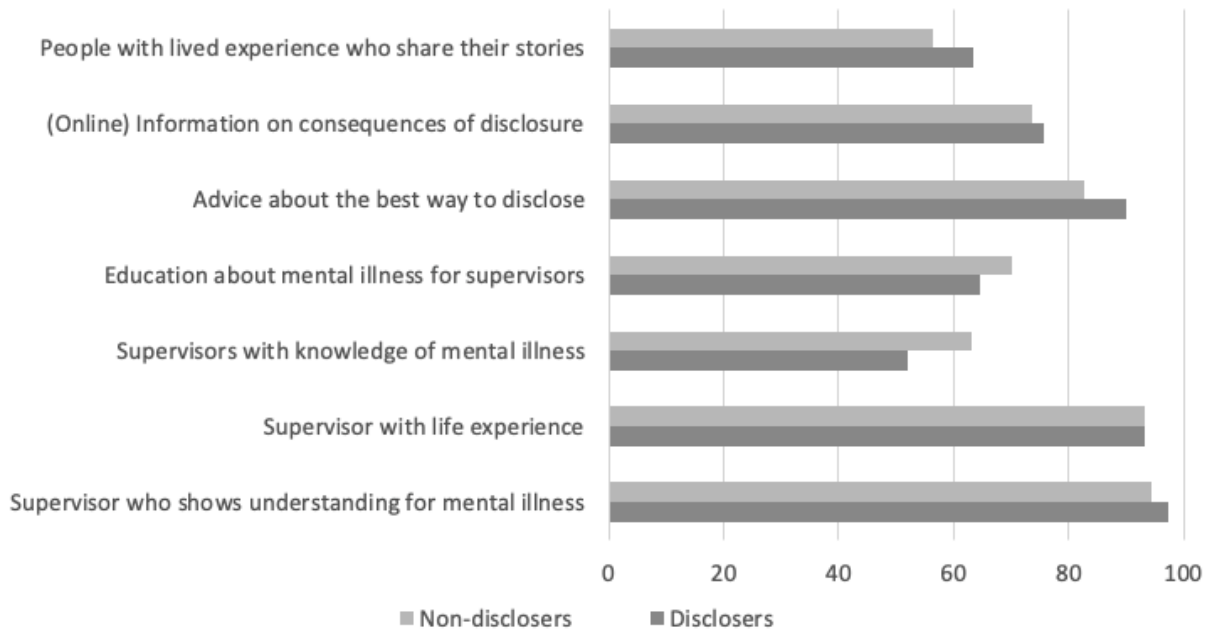

er review only

## Appendix

### Appendix A. Measures used to assess current mental illness and substance abuse.

| Scale                                             | Information                                                                                                                                                                                                      | Psychometric properties based on earlier studies                                                                                                                                                                                                                         | Reliability in current study                            | Cut-off score used                                                                                                                | References  |
|---------------------------------------------------|------------------------------------------------------------------------------------------------------------------------------------------------------------------------------------------------------------------|--------------------------------------------------------------------------------------------------------------------------------------------------------------------------------------------------------------------------------------------------------------------------|---------------------------------------------------------|-----------------------------------------------------------------------------------------------------------------------------------|-------------|
| The hospital anxiety and depression scale (HADS). | A 14-item scale measuring anxiety and depression.                                                                                                                                                                | Based on a literature review, reliability of the anxiety scale of the HADS varies from .68 to .93 and the depression scale varies from .67 to .90. Sensitivity and specificity for both anxiety and depression was approximately .80.                                    | Depression:<br>$\alpha=.85$<br>Anxiety:<br>$\alpha=.84$ | A cut-off score of $> 8$ was used for depression and anxiety, as recommended by earlier research.                                 | (16, 36-38) |
| PTSD checklist for the DSM-5 (PCL-5)              | 20-item scale measuring PTSD symptoms. Participants received a question screening whether they had experienced extremely stressful events (examples were provided), and if yes, they received the PCL-5.         | The PCL-5 has strong reliability ( $\alpha = .94$ ) and convergent ( $r_s = .74$ to $.85$ ) and discriminant ( $r_s = .31$ to $.60$ ) validity. Sensitivity is approximately $.77$ and specificity $.96$ .                                                               | $\alpha = .94$                                          | A cut-off of $>33$ was used as an indication of PTSD, following the guidelines.                                                   | (19, 39)    |
| ASSIST-LITE                                       | Measure to assess a wide range of substance (ab)use. This questionnaire consists of 6 items, one per substance, and 2-3 follow up questions in case a substance is used by the participant in the past 3 months. | Sensitivity for each substance was between $.8$ and $1.0$ , and specificity between $.7$ and $.8$ . Reliability is N.A. as all questions are about different substances.                                                                                                 | N/A as all questions are about different substances.    | A cut-off of $\geq 2$ was used for all substances except for alcohol, where the cut-off was $\geq 3$ , following the user manual. | (17)        |
| AUDIT-C                                           | A 3-item scale, to assess alcohol abuse.                                                                                                                                                                         | The AUDIT-C has been validated and shown to have good internal consistency in a variety of different samples. In a previous study among military personnel, the reliability was $.77$ . Specificity is between $.89$ and $.91$ and sensitivity between $.73$ and $.86$ . | $\alpha=.64$                                            | A cut-off of $\geq 8$ was used, as recommended for military population.                                                           | (18, 40)    |



**Appendix B. Mental illness and substance abuse scores.**

|                                                                            | <b>Military personnel who indicated having (had) MI</b> |             | <b>Military personnel who indicated not having had MI</b> |             |
|----------------------------------------------------------------------------|---------------------------------------------------------|-------------|-----------------------------------------------------------|-------------|
|                                                                            | <b>N</b>                                                | <b>%</b>    | <b>N</b>                                                  | <b>%</b>    |
|                                                                            | <b>324</b>                                              | <b>37.0</b> | <b>554</b>                                                | <b>63.1</b> |
| <b>Type of mental illness as reported by military personnel themselves</b> |                                                         |             |                                                           |             |
| Anxiety (incl. obsessive compulsive disorder)                              | 111                                                     | 34.3        | N/A                                                       | N/A         |
| Depression (incl. manic and bipolar)                                       | 146                                                     | 45.1        | N/A                                                       | N/A         |
| Burn-out                                                                   | 176                                                     | 54.3        | N/A                                                       | N/A         |
| Stress                                                                     | 260                                                     | 80.3        | N/A                                                       | N/A         |
| Exhaustion                                                                 | 205                                                     | 63.3        | N/A                                                       | N/A         |
| Post traumatic stress disorder                                             | 55                                                      | 17.0        | N/A                                                       | N/A         |
| Psychotic disorders                                                        | 3                                                       | .9          | N/A                                                       | N/A         |
| Personality disorder                                                       | 77                                                      | 23.8        | N/A                                                       | N/A         |
| Autism                                                                     | 16                                                      | 5.0         | N/A                                                       | N/A         |
| Attention deficit hyperactivity disorder                                   | 34                                                      | 10.5        | N/A                                                       | N/A         |
| Eating disorder                                                            | 10                                                      | 3.1         | N/A                                                       | N/A         |
| Substance abuse                                                            | 56                                                      | 17.3        | N/A                                                       | N/A         |
| <b>Current type of mental illness based on measures of mental health</b>   |                                                         |             |                                                           |             |
| HADS_depression                                                            | 59                                                      | 18.2        | 18                                                        | 3.3         |
| HADS_anxiety                                                               | 65                                                      | 20.1        | 14                                                        | 2.5         |
| Assist_lite_tobacco                                                        | 48                                                      | 14.8        | 79                                                        | 14.3        |
| Assist_lite_alcohol                                                        | 50                                                      | 15.4        | 38                                                        | 6.9         |
| Assist_lite_cannabis                                                       | 1                                                       | .3          | 3                                                         | .5          |
| Assist_lite_amphetamine                                                    | 2                                                       | .6          | 0                                                         | 0.0         |
| Assist_lite_sleepmedication                                                | 8                                                       | 2.5         | 2                                                         | .4          |
| Assist_lite_streetdrug                                                     | 0                                                       | 0.0         | 0                                                         | 0.0         |
| Audit_C                                                                    | 13                                                      | 4.0         | 19                                                        | 3.4         |
| PCL-5 score                                                                | 19                                                      | 5.9         | 2                                                         | .4          |



**STROBE 2007 (v4) Statement—Checklist of items that should be included in reports of *cross-sectional studies***

| Section/Topic                | Item # | Recommendation                                                                                                                                                                       | Reported on page # |
|------------------------------|--------|--------------------------------------------------------------------------------------------------------------------------------------------------------------------------------------|--------------------|
| <b>Title and abstract</b>    | 1      | (a) Indicate the study's design with a commonly used term in the title or the abstract                                                                                               | 1-2                |
|                              |        | (b) Provide in the abstract an informative and balanced summary of what was done and what was found                                                                                  | 2                  |
| <b>Introduction</b>          |        |                                                                                                                                                                                      |                    |
| Background/rationale         | 2      | Explain the scientific background and rationale for the investigation being reported                                                                                                 | 4                  |
| Objectives                   | 3      | State specific objectives, including any prespecified hypotheses                                                                                                                     | 5                  |
| <b>Methods</b>               |        |                                                                                                                                                                                      |                    |
| Study design                 | 4      | Present key elements of study design early in the paper                                                                                                                              | 5                  |
| Setting                      | 5      | Describe the setting, locations, and relevant dates, including periods of recruitment, exposure, follow-up, and data collection                                                      | 6                  |
| Participants                 | 6      | (a) Give the eligibility criteria, and the sources and methods of selection of participants                                                                                          | 6                  |
| Variables                    | 7      | Clearly define all outcomes, exposures, predictors, potential confounders, and effect modifiers. Give diagnostic criteria, if applicable                                             | 6-8                |
| Data sources/<br>measurement | 8*     | For each variable of interest, give sources of data and details of methods of assessment (measurement). Describe comparability of assessment methods if there is more than one group | 6-8                |
| Bias                         | 9      | Describe any efforts to address potential sources of bias                                                                                                                            | 20-21              |
| Study size                   | 10     | Explain how the study size was arrived at                                                                                                                                            | 6, 10              |
| Quantitative variables       | 11     | Explain how quantitative variables were handled in the analyses. If applicable, describe which groupings were chosen and why                                                         | 9                  |
| Statistical methods          | 12     | (a) Describe all statistical methods, including those used to control for confounding                                                                                                | 9                  |
|                              |        | (b) Describe any methods used to examine subgroups and interactions                                                                                                                  | 9                  |
|                              |        | (c) Explain how missing data were addressed                                                                                                                                          | 9                  |
|                              |        | (d) If applicable, describe analytical methods taking account of sampling strategy                                                                                                   | N/A                |
|                              |        | (e) Describe any sensitivity analyses                                                                                                                                                | N/A                |

|                          |     |                                                                                                                                                                                                              |       |
|--------------------------|-----|--------------------------------------------------------------------------------------------------------------------------------------------------------------------------------------------------------------|-------|
| <b>Results</b>           |     |                                                                                                                                                                                                              |       |
| Participants             | 13* | (a) Report numbers of individuals at each stage of study—eg numbers potentially eligible, examined for eligibility, confirmed eligible, included in the study, completing follow-up, and analysed            | 10    |
|                          |     | (b) Give reasons for non-participation at each stage                                                                                                                                                         | 10    |
|                          |     | (c) Consider use of a flow diagram                                                                                                                                                                           | N/A   |
| Descriptive data         | 14* | (a) Give characteristics of study participants (eg demographic, clinical, social) and information on exposures and potential confounders                                                                     | 10-11 |
|                          |     | (b) Indicate number of participants with missing data for each variable of interest                                                                                                                          | 9     |
| Outcome data             | 15* | Report numbers of outcome events or summary measures                                                                                                                                                         | 10    |
| Main results             | 16  | (a) Give unadjusted estimates and, if applicable, confounder-adjusted estimates and their precision (eg, 95% confidence interval). Make clear which confounders were adjusted for and why they were included | 11-17 |
|                          |     | (b) Report category boundaries when continuous variables were categorized                                                                                                                                    | 9     |
|                          |     | (c) If relevant, consider translating estimates of relative risk into absolute risk for a meaningful time period                                                                                             | N/A   |
| Other analyses           | 17  | Report other analyses done—eg analyses of subgroups and interactions, and sensitivity analyses                                                                                                               | 9     |
| <b>Discussion</b>        |     |                                                                                                                                                                                                              |       |
| Key results              | 18  | Summarise key results with reference to study objectives                                                                                                                                                     | 18    |
| Limitations              | 19  | Discuss limitations of the study, taking into account sources of potential bias or imprecision. Discuss both direction and magnitude of any potential bias                                                   | 20-21 |
| Interpretation           | 20  | Give a cautious overall interpretation of results considering objectives, limitations, multiplicity of analyses, results from similar studies, and other relevant evidence                                   | 18-21 |
| Generalisability         | 21  | Discuss the generalisability (external validity) of the study results                                                                                                                                        | 20-21 |
| <b>Other information</b> |     |                                                                                                                                                                                                              |       |
| Funding                  | 22  | Give the source of funding and the role of the funders for the present study and, if applicable, for the original study on which the present article is based                                                | 22    |

\*Give information separately for cases and controls in case-control studies and, if applicable, for exposed and unexposed groups in cohort and cross-sectional studies.

**Note:** An Explanation and Elaboration article discusses each checklist item and gives methodological background and published examples of transparent reporting. The STROBE checklist is best used in conjunction with this article (freely available on the Web sites of PLoS Medicine at <http://www.plosmedicine.org/>, Annals of Internal Medicine at <http://www.annals.org/>, and Epidemiology at <http://www.epidem.com/>). Information on the STROBE Initiative is available at [www.strobe-statement.org](http://www.strobe-statement.org).

# BMJ Open

## Mental health issues and illness and substance use disorder (non-)disclosure to a supervisor: A cross-sectional study on beliefs, attitudes and needs of military personnel.

|                                 |                                                                                                                                                                                                                                                                                                                                                                                                                                                                                                                                                                                                                                                                                                                                                                                                                                                                                                                                                                                                                                                                                                                 |
|---------------------------------|-----------------------------------------------------------------------------------------------------------------------------------------------------------------------------------------------------------------------------------------------------------------------------------------------------------------------------------------------------------------------------------------------------------------------------------------------------------------------------------------------------------------------------------------------------------------------------------------------------------------------------------------------------------------------------------------------------------------------------------------------------------------------------------------------------------------------------------------------------------------------------------------------------------------------------------------------------------------------------------------------------------------------------------------------------------------------------------------------------------------|
| Journal:                        | <i>BMJ Open</i>                                                                                                                                                                                                                                                                                                                                                                                                                                                                                                                                                                                                                                                                                                                                                                                                                                                                                                                                                                                                                                                                                                 |
| Manuscript ID                   | bmjopen-2022-063125.R1                                                                                                                                                                                                                                                                                                                                                                                                                                                                                                                                                                                                                                                                                                                                                                                                                                                                                                                                                                                                                                                                                          |
| Article Type:                   | Original research                                                                                                                                                                                                                                                                                                                                                                                                                                                                                                                                                                                                                                                                                                                                                                                                                                                                                                                                                                                                                                                                                               |
| Date Submitted by the Author:   | 10-Nov-2022                                                                                                                                                                                                                                                                                                                                                                                                                                                                                                                                                                                                                                                                                                                                                                                                                                                                                                                                                                                                                                                                                                     |
| Complete List of Authors:       | Bogaers, Rebecca; Tilburg University Tilburg School of Social and Behavioral Sciences, Tranzo, Scientific Center for Care and Wellbeing; Brain Research and Innovation Centre<br>Geuze, Elbert; Brain Research and Innovation Centre; Brain Center Rudolf Magnus, University Medical Center Utrecht, Department of Psychiatry<br>van Weeghel, Jaap; Tilburg University Tilburg School of Social and Behavioral Sciences, Tranzo, Scientific Center for Care and Wellbeing<br>Leijten, Fenna; Netherlands Ministry of Defence, Directorate-General of Policy, Directorate of Strategy and Knowledge<br>van de Mheen, D; Tilburg University Tilburg School of Social and Behavioral Sciences, Tranzo, Scientific Center for Care and Wellbeing<br>Greenberg, N; King's College London, King's Centre for Military Health Research<br>Rozema, A; Tilburg University Tilburg School of Social and Behavioral Sciences, Tranzo, Scientific Center for Care and Wellbeing<br>Brouwers, Evelien; Tilburg University Tilburg School of Social and Behavioral Sciences, Tranzo, Scientific Center for Care and Wellbeing |
| <b>Primary Subject Heading</b>: | Occupational and environmental medicine                                                                                                                                                                                                                                                                                                                                                                                                                                                                                                                                                                                                                                                                                                                                                                                                                                                                                                                                                                                                                                                                         |
| Secondary Subject Heading:      | Mental health, Occupational and environmental medicine, Addiction                                                                                                                                                                                                                                                                                                                                                                                                                                                                                                                                                                                                                                                                                                                                                                                                                                                                                                                                                                                                                                               |
| Keywords:                       | MENTAL HEALTH, OCCUPATIONAL & INDUSTRIAL MEDICINE, PREVENTIVE MEDICINE, Substance misuse < PSYCHIATRY, PSYCHIATRY                                                                                                                                                                                                                                                                                                                                                                                                                                                                                                                                                                                                                                                                                                                                                                                                                                                                                                                                                                                               |
|                                 |                                                                                                                                                                                                                                                                                                                                                                                                                                                                                                                                                                                                                                                                                                                                                                                                                                                                                                                                                                                                                                                                                                                 |

SCHOLARONE™  
Manuscripts



I, the Submitting Author has the right to grant and does grant on behalf of all authors of the Work (as defined in the below author licence), an exclusive licence and/or a non-exclusive licence for contributions from authors who are: i) UK Crown employees; ii) where BMJ has agreed a CC-BY licence shall apply, and/or iii) in accordance with the terms applicable for US Federal Government officers or employees acting as part of their official duties; on a worldwide, perpetual, irrevocable, royalty-free basis to BMJ Publishing Group Ltd ("BMJ") its licensees and where the relevant Journal is co-owned by BMJ to the co-owners of the Journal, to publish the Work in this journal and any other BMJ products and to exploit all rights, as set out in our [licence](#).

The Submitting Author accepts and understands that any supply made under these terms is made by BMJ to the Submitting Author unless you are acting as an employee on behalf of your employer or a postgraduate student of an affiliated institution which is paying any applicable article publishing charge ("APC") for Open Access articles. Where the Submitting Author wishes to make the Work available on an Open Access basis (and intends to pay the relevant APC), the terms of reuse of such Open Access shall be governed by a Creative Commons licence – details of these licences and which [Creative Commons](#) licence will apply to this Work are set out in our licence referred to above.

Other than as permitted in any relevant BMJ Author's Self Archiving Policies, I confirm this Work has not been accepted for publication elsewhere, is not being considered for publication elsewhere and does not duplicate material already published. I confirm all authors consent to publication of this Work and authorise the granting of this licence.

1  
2  
3 **Mental health issues and illness and substance use disorder (non-)disclosure to a**  
4  
5 **supervisor: A cross-sectional study on beliefs, attitudes and needs of military personnel.**  
6  
7  
8  
9

10 Rebecca Bogaers<sup>\*a,b</sup>, Elbert Geuze<sup>b,c</sup>, Jaap van Weeghel<sup>a</sup>, Fenna Leijten<sup>d</sup>, Dike van de  
11  
12 Mheen<sup>a</sup>, Neil Greenberg<sup>e</sup>, Andrea Rozema<sup>a</sup>, Evelien Brouwers<sup>a</sup>.  
13  
14  
15  
16

17 <sup>a</sup>Tranzo, Scientific Center for Care and Wellbeing, Tilburg School of Social and Behavioral  
18 Sciences, Tilburg University, the Netherlands.; <sup>b</sup>Brain Research and Innovation Centre,  
19 Ministry of Defence, the Netherlands.; <sup>c</sup> Brain Center Rudolf Magnus, Department of  
20 Psychiatry, University Medical Center Utrecht, the Netherlands.; <sup>d</sup> Directorate of Strategy and  
21 Knowledge, Directorate-General of Policy, Ministry of Defence, the Netherlands.; <sup>d</sup> King's  
22 Centre for Military Health Research, King's College, United Kingdom.  
23  
24  
25

26 \*Corresponding author: r.i.bogaers@tilburguniversity.edu  
27  
28  
29  
30  
31  
32  
33  
34  
35  
36

37 **Word count: 4028**

38  
39 **Abstract count: 299**

40  
41 **References: 42**  
42  
43  
44  
45  
46  
47  
48  
49  
50  
51  
52  
53  
54

55 **Keywords:** Disclosure, Mental health issues and illness, Sustainable employment, Military,  
56  
57 Stigma  
58  
59  
60

## Abstract

**Objectives.** Research suggests that military personnel frequently delay disclosing mental health issues and illness (MHI), including substance use disorder, to supervisors. This delay causes missed opportunities for support and workplace accommodations which may help to avoid adverse occupational outcomes. The current study aims to examine disclosure related beliefs, attitudes, and needs, to create better understanding of personnel's disclosure decision-making. **Design.** A cross-sectional questionnaire study among military personnel with and without MHI. Beliefs, attitudes, and needs regarding the (non-)disclosure decision to a supervisor were examined, including factors associated with (non-)disclosure intentions and decisions. Descriptive and regression (logistic and ordinal) analyses were performed. **Setting.** The study took place within the Dutch military. **Participants.** Military personnel with MHI (N=324) and without MHI (N=554) participated in this study. **Outcome measure.** (Non-)disclosure intentions and decisions. **Results.** Common beliefs and attitudes *pro non-disclosure* were the preference to solve one's own problems (68.3%), the preference for privacy (58.9%), and a variety of stigma related concerns. Common beliefs and attitudes *pro disclosure* were that personnel wanted to perform well at work (93.3%) and the desire to act responsibly towards work colleagues (84.5%). The most reported need for future disclosure (96.8%) was having a supervisor who shows understanding for MHI. The following factors were associated both with non-disclosure intentions and decisions: higher preference for privacy (OR(95%CI) = 1.99(1.50–2.65)<sub>intention</sub>, 2.05(1.12–3.76)<sub>decision</sub>) and self-management (OR(95%CI) = 1.64(1.20–2.23)<sub>intention</sub>, 1.79(1.00–3.20)<sub>decision</sub>), higher stigma related concerns (OR(95%CI) = 1.76(1.12–2.77)<sub>intention</sub>, 2.21(1.02–4.79)<sub>decision</sub>), and lower quality of supervisor-employee relationship (OR(95%CI) = .25(.15–.42)<sub>intention</sub>, .47(.25–.87)<sub>decision</sub>).

**Conclusion.** To facilitate (early-)disclosure to a supervisor, creating opportunities for workplace support, interventions should focus on decreasing stigma and discrimination and

1  
2  
3 align with personnel's preference for self-management. Furthermore, training is needed for  
4  
5 supervisors on how to recognize, and effectively communicate with, personnel with MHI.  
6

7  
8 Focus should also be on improving supervisor-employee relationships.  
9

### 10 11 12 **Strengths and Limitations** 13

- 14  
15 • Disclosure of mental health issues and illness to a supervisor was examined in the  
16  
17 military, a context in which little research has been done on this topic.  
18
- 19  
20 • This study included a group that is usually hard to study, namely military personnel  
21  
22 who have not disclosed.  
23
- 24  
25 • This study included both personnel with and without mental health issues and illness,  
26  
27 providing insights for interventions for personnel who may develop mental health  
28  
29 issues and illness in the future.  
30
- 31  
32 • The sample is not representative for the entire military, due to the sampling method.  
33
- 34  
35 • Due to the cross-sectional design of the study, no causality can be presumed.  
36  
37  
38  
39  
40  
41  
42  
43  
44  
45  
46  
47  
48  
49  
50  
51  
52  
53  
54  
55  
56  
57  
58  
59  
60

## Introduction

The decision for workers whether to disclose their mental health issues and illness (MHI), including substance use disorder, to their supervisors can have far-reaching consequences for their sustainable employment (1-4). Disclosure can lead to workplace support and accommodations, which can prevent worsened symptoms and sick-leave, and non-disclosure can lead to missed opportunities for this support (2, 3, 5). However, disclosure can also lead to being stigmatized and discriminated against (6, 7).

The disclosure dilemma is expected to be even more prominent for trauma-prone occupations, such as the military, where workers are expected to be 'strong' and disclosure may yield less positive outcomes (5, 8). Additionally, workers in these high-risk occupations are exposed to stressors at work, increasing their risk of developing MHI (9). Previous research in the military showed that there is a high preference for solving one's own problems (10), there are stigma related concerns and military personnel tend to delay seeking help (6, 11, 12). Together this might cause a delay in disclosure to a supervisor. To facilitate (early-)disclosure, so that personnel can receive support which can prevent adverse occupational outcomes (2, 3, 5), more insight is needed into the (non-)disclosure decision.

Although the (non-)disclosure decision is complex and has far-reaching consequences, research on this matter is scarce and mostly qualitative, especially in the military (3, 6, 11, 13). Research has shown that the supervisor plays an important role, where supervisor attitude and behavior can form both a barrier as well as be a facilitator for disclosure (6, 14, 15). Furthermore, "The model of employee decision-making about disclosure of a mental disorder at work" proposes that there is a default position of non-disclosure, caused by fear of stigma, wanting to maintain boundaries, and maintaining confidentiality (16). This model proposes that a triggering incident is needed before a disclosure decision is made (16).



1  
2  
3 The aim of the current study was to gain insight into the (non-)disclosure decision to a  
4 supervisor in the military, and to confirm and expand earlier qualitative findings (6). This was  
5 done by examining beliefs, attitudes and needs related to disclosure to a supervisor. Based on  
6 earlier qualitative research on disclosure in the military (6, 11), studies on disclosure among  
7 Dutch workers (17, 18), and literature reviews on disclosure (2, 19), it was hypothesized that  
8 the following beliefs and attitudes *pro non-disclosure* would be important for, and associated  
9 with, the disclosure decision: stigma related concerns (e.g. social rejection), preference for  
10 self-management and privacy, negative attitudes of the supervisor towards MHI, and  
11 difficulty talking about MHI. Additionally, the following beliefs and attitudes *pro disclosure*  
12 were hypothesized to be important for the disclosure decision: wanting to be one's true and  
13 authentic self, positive attitudes of the supervisor towards MHI, setting an example,  
14 organizational policies, a need for work accommodations, feelings of responsibility, whether  
15 MHI affects work functioning, advice from others, and not having a choice due to the  
16 visibility of symptoms, having to report sick or needing treatment during work. To inform  
17 future interventions, several needs related to disclosure were also assessed, based on earlier  
18 qualitative research (6). These needs were related to information on how to disclose and  
19 education for supervisors on how to support military personnel with MHI.  
20  
21  
22  
23  
24  
25  
26  
27  
28  
29  
30  
31  
32  
33  
34  
35  
36  
37  
38  
39  
40  
41

42 As personnel with and without MHI have shown to have different views on treatment  
43 seeking (10, 12), the current study examined both actual disclosure decisions in personnel  
44 with MHI as well as future disclosure intentions for those without MHI. The research  
45 questions were: (1) 'What are beliefs, attitudes, and needs of military personnel regarding  
46 disclosure to a supervisor?', (2) 'Do disclosers, differ from non-disclosers, and if so, how?',  
47 and (3) 'What factors are associated with non-disclosure to a supervisor?'.  
48  
49  
50  
51  
52  
53  
54  
55  
56  
57  
58  
59  
60

## Method

### Design

A cross-sectional observational design with an online questionnaire. Comparisons were made based on past disclosure decisions for personnel with MHI and on disclosure intentions for those without MHI. Data collection happened simultaneously with a study on treatment seeking for MHI (12). The strobe-checklist was used to report this study (20).

### Setting

This study took place within the Dutch military, where healthcare is organized internally. There are sanctions for use of soft and hard drugs. However, when substance use disorder is reported to a mental health professional, there are confidentiality agreements (10).

### Patient and public involvement

Different stakeholders from the Dutch military (psychologists, psychiatrists, policymakers and military personnel) were involved in the development of the questionnaire. They provided advise on the language used in the questionnaire to ensure that it was military appropriate language. They also provided advise on the best way to recruit participants.

### Participant recruitment

Active-duty military personnel who have been on deployment in the past 5 years were recruited. To ensure that both personnel with and without MHI would be present in the sample, existing data from a questionnaire personnel receive after deployment was used to select a sample. This questionnaire included scores of depression, aggression, alcohol abuse and PTSD. Clinical cut-off scores were used to identify personnel with and without an

1  
2  
3 indication of MHI. Next, a stratified sample, based on gender, age, military division and rank  
4  
5 of personnel was approached, half with indication of MHI (N=1000) and half without  
6  
7 (N=1000).  
8  
9

10 Data were collected between January and February 2021. All personnel were invited  
11  
12 at the same time, both by e-mail and a letter. Reminders were sent after 3 and 5 weeks. It was  
13  
14 made clear that the responses to the questionnaire would be anonymous.  
15  
16

## 17 18 19 **Measures**

### 20 21 *Demographics*

22  
23 Gender, age, marital status, education-level, type of work (operational or not),  
24  
25 military department, rank, and years of service were assessed.  
26  
27

### 28 29 *Mental health issues and illness*

30  
31 **Current MHI.** To assess current MHI, the following measures were used;  
32  
33 (a)Hospital anxiety and depression scale (21), (b)ASSIST-LITE for substance use disorder  
34  
35 (22), (c)AUDIT-C, for alcohol use (23), and (d)PTSD checklist for DSM-5 (24). For  
36  
37 psychometric properties and cut-off scores, see appendix A.  
38  
39

40  
41 **Self-reported MHI.** Personnel were asked whether they have (had) MHI. Group  
42  
43 membership (i.e., current/past MHI or no MHI) was determined based on this. If personnel  
44  
45 reported having (had) MHI, they received a list of 15 possible types of MHI (see appendix B)  
46  
47 and were asked to indicate whether it concerned current or past MHI, in line with earlier  
48  
49 research (12, 17, 25). They were asked whether the MHI was work-related (yes/no) and to  
50  
51 rate the severity of their symptoms (during the worst time) on a scale of 0–10.  
52  
53

### 54 55 56 *(Non-)Disclosure intentions and decisions* 57 58 59 60

1  
2  
3 Personnel with MHI were asked whether they had disclosed to their supervisor  
4 (yes/no). Personnel without MHI were asked, in case they would develop MHI in the future,  
5 whether they would disclose this to their supervisor, using a 4-point scale ranging from very-  
6 unlikely to very-likely.  
7  
8  
9  
10  
11  
12  
13

### 14 ***Beliefs, attitudes and needs***

15  
16  
17 Based on earlier qualitative research on disclosure in the military (6, 11), studies on  
18 disclosure among Dutch workers (17, 18), and literature reviews on disclosure (2, 3), it was  
19 determined which beliefs and attitudes should be assessed. Regarding the beliefs and  
20 attitudes, 13 statements *pro non-disclosure* (e.g. I would prefer to solve my own problems)  
21 and 11 statements *pro disclosure* (e.g. In order to be your true self, disclosure is important)  
22 were developed. Please see the results section for a full overview of the statements. Stigma  
23 was found to be a main barrier to disclosure in our qualitative study (6). Therefore, several  
24 stigma related statements were included. All the statements were assessed by several people  
25 working in the military, to assure the questions were appropriate for the military context. The  
26 statements were adjusted according to their feedback. Participants were asked to indicate on a  
27 4-point scale to what extent they agreed with the statements, ranging from completely  
28 disagree to completely agree.  
29  
30  
31  
32  
33  
34  
35  
36  
37  
38  
39  
40  
41  
42  
43  
44

45 Personnel without MHI were asked additional questions about their needs regarding  
46 disclosure if they would develop MHI in the future. Based on findings from the earlier  
47 qualitative study (6), they were given seven options (e.g. a supervisor who shows  
48 understanding for MHI) and were asked to rate these on a 4-point scale ranging from 'Not at  
49 all' to 'Very much'. Please see the results section for a full overview of the assessed needs.  
50  
51  
52  
53  
54  
55  
56  
57  
58  
59  
60

## (Previous) experience

**Familiarity.** Participants were asked about MHI in their surroundings using an adaptation of the Level of Contact Report (26), following earlier research (25, 27). The total score was used.

**Previous experience.** Participants were asked whether they had previous experience, and/or seen experiences of others, with disclosure to a supervisor. If yes, they were asked whether this experience was positive or negative.

## Work context

**Unit cohesion.** A three-item measure was used for perceived unit cohesion (28). For example '*the members of my unit are cooperative with each other*'. Items were measured on a 5-point scale ranging from 'Completely-disagree' to 'Completely-agree'. Mean scores were used. Participants with MHI were asked about unit cohesion at the time they experienced MHI (28).

**Relationship supervisor.** A six-item measure for the relationship with the supervisor from the Questionnaire on the Experience and Evaluation of Work (QEEW) was used. This questionnaire is the most used and validated questionnaire for work experiences in the Netherlands (29). Items were measured on a 4-point scale with answer categories 'Always', 'Often', 'Sometimes' and 'Never'. Mean scores were used, with higher scores indicating better relationship quality. Participants with MHI were asked about the relationship at the time they experienced MHI.

## Statistical analyses

1  
2  
3 For beliefs, attitudes, and needs surrounding (non-)disclosure, descriptive analyses  
4 were performed. Chi-square tests and Mann-Whitney U-tests were used for comparisons  
5 between those who disclosed/intended to disclose and those who did not, as variables were  
6 not normally distributed.  
7  
8  
9  
10  
11

12 To examine factors associated with (non-)disclosure, two separate analyses were  
13 performed. For personnel with MHI, a logistic regression was performed with non-disclosure  
14 decision as the dependent variable (0=disclosure, 1=non-disclosure). For personnel without  
15 MHI, an ordinal regression was performed, as disclosure intention had more than two  
16 categories. As the assumption of proportional odds was violated at first, the categories 'very  
17 unlikely' and 'unlikely' were merged, resulting in the dependent variable non-disclosure  
18 intention with categories 1=very-likely, 2=likely, and 3=(very)-unlikely. To prevent loss of  
19 information 'likely' and 'very-likely' were not combined. Fear of negative career  
20 consequences, social rejection, discrimination, self-stigma, shame, fear of receiving blame,  
21 fear of gossip and confidentiality concerns were combined into one (mean) measure of  
22 stigma, as they are all aspects of stigma (30). Together these items formed a reliable scale  
23 ( $\alpha_{\text{with MHI}}=.89$ ,  $\alpha_{\text{without MHI}}=.91$ ). There were no missing data, as forced response answers were  
24 used during data acquisition. All analyses were performed using SPSS.  
25  
26  
27  
28  
29  
30  
31  
32  
33  
34  
35  
36  
37  
38  
39  
40  
41  
42  
43  
44

### 45 **Ethical considerations**

46  
47 Written informed consent was obtained from all subjects/patients. The authors assert  
48 that all procedures contributing to this work comply with the ethical standards of the relevant  
49 national and institutional committees on human experimentation and with the Helsinki  
50 Declaration of 1975, as revised in 2008. All procedures involving human subjects/patients  
51 were approved by the Tilburg School of Social and Behavioral Sciences Ethics Review  
52 Boards (approval number RP324) and the Dutch Military Ethics Review Board.  
53  
54  
55  
56  
57  
58  
59  
60

## Results

### Participant characteristics

#### *Response rate*

After removing duplicates (caused by personnel going on multiple deployments) and personnel who had left active service from the original sample, a total of N=1627 eligible respondents were left. Of those, 63% (N=1025) started the questionnaire, and 54% (N=878) fully completed it and were used for further analysis. Compared to personnel who completed the questionnaire, those who did not complete it included more females ( $\chi^2(1, N=1008)=6.01, p=.014$ ), more lower and middle education level ( $\chi^2(2, N=1008)=7.25, p=.027$ ), and more non-commissioned officers ( $\chi^2(2, N=1006)=8.26, p=.016$ ). The majority quit while answering mental health questions.

#### *Non-disclosure (intentions)*

Of those with MHI (N=324), 24.4% indicated not having disclosed their MHI to their supervisor. Of those without MHI (N=554), 15.6% did not intend to disclose if they would develop MHI in the future.

#### *Sample characteristics*

Sample characteristics can be found in Table 1. For personnel with MHI, there was a significant association between marital status and non-disclosure decision ( $\chi^2(1, N=324)=5.53, p=.019$ ) with more people with a partner within the non-disclosers group. Those who had not disclosed, reported significantly lower symptom severity (M=6.01) compared to those who had disclosed (M=7.38,  $U=5885.5, Z=-5.37, p<.001$ ). For personnel

1  
2  
3 without MHI, there were no significant differences in demographics based on non-disclosure  
4 intentions. Information on reported MHI can be found in Appendix B.  
5  
6

7 [INSERT TABLE 1]  
8  
9  
10  
11

## 12 **Beliefs, attitudes, and needs regarding (non-)disclosure to a supervisor**

13  
14 Regarding beliefs and attitudes *pro non-disclosure*, personnel preferred to solve their  
15 own problems (73.8%with(w/)MHI, 65.2% (without(w/o)MHI)) and preferred privacy  
16 (58.3%w/MHI, 59.3%w/oMHI). There were also high stigma related concerns, with  
17 personnel reporting they saw (would see) themselves as weak due to MHI (52.5%w/MHI,  
18 26.4%w/oMHI), had concerns about negative career consequences (35.5%w/MHI,  
19 24.4%w/oMHI) and fear of social rejection (33.0%w/MHI, 20.6%w/oMHI). Only a minority  
20 reported that their supervisor had negative attitudes towards MHI (9.3%w/MHI,  
21 4.9%w/oMHI).  
22  
23  
24  
25  
26  
27  
28  
29  
30  
31  
32

33 As for beliefs and attitudes *pro disclosure*, the large majority indicated disclosure  
34 would allow them to be their true and authentic self (95.7%w/MHI, 91.2%w/oMHI), and  
35 believed disclosure was important due to the responsibility belonging to the nature of their  
36 work (74.7%w/MHI, 90.3%w/oMHI). In addition, most reported that the military has good  
37 policy for those who develop MHI (72.2%w/MHI, 87.9%w/oMHI) and that generally  
38 supervisors take MHI seriously (82.4%w/MHI, 87.7%w/oMHI). Furthermore, personnel  
39 reported that it matters for the disclosure decision whether MHI influences occupational  
40 functioning (69.8%w/MHI, 74.7%w/oMHI) and whether work accommodations are needed  
41 (43.5%w/MHI, 62.8%w/oMHI). Of those with MHI who had disclosed, the majority  
42 indicated having had no choice, with 69% needing treatment during work hours and 46.9%  
43 having to report sick. An overview of all beliefs and attitudes can be found in Table 2.  
44  
45  
46  
47  
48  
49  
50  
51  
52  
53  
54  
55  
56  
57

58 [INSERT TABLE 2]  
59  
60



1  
2  
3  
4  
5  
6 As for needs regarding future disclosure to a supervisor, the highest need was reported  
7  
8 for supervisors who show understanding for MHI (96.8%) and have life experience (93.1%),  
9  
10 and advice about the best way to disclose (when/where/how) (88.8%). An overview of all  
11  
12 needs can be found in Figure 1.  
13

14 [INSERT FIGURE 1]  
15  
16  
17  
18

### 19 **Differences between disclosers and non-disclosers**

20  
21 Overall, those who did not (intend to) disclose, reported significantly higher  
22  
23 preference for solving own problems and for privacy, and lower feelings of responsibility due  
24  
25 to the nature of their work.  
26  
27

28  
29 Within personnel with MHI, there was also a significant difference between non-  
30  
31 disclosers and disclosers in the following beliefs and attitudes *pro disclosure*: those who had  
32  
33 not disclosed reported MHI having less effect on their occupational functioning, and less  
34  
35 need for work accommodations compared to disclosers.  
36  
37

38  
39 Within personnel without MHI, those who intended to disclose and those who did not,  
40  
41 differed significantly on all beliefs and attitudes *pro non-disclosure*. For beliefs and attitudes  
42  
43 *pro disclosure*, those with no intention to disclose indicated significantly lower belief that the  
44  
45 military has good policy for those with MHI, supervisors taking MHI less seriously, and a  
46  
47 lower desire to be a good example to others with MHI. Results with statistics can be found in  
48  
49 Table 2. There were no significant differences in reported needs for future disclosure, based  
50  
51 on disclosure intention.  
52  
53  
54  
55

### 56 **Factors associated with non-disclosure to a supervisor**

57  
58  
59  
60

1  
2  
3 For personnel with MHI, the logistic regression model with the dependent variable  
4 non-disclosure, was statistically significant ( $\chi^2(24)=149.30, p<.001$ ) and explained 55.0%  
5 (Nagelkerke $R^2$ ) of the variance in non-disclosure and correctly classified 85.% of cases.  
6  
7  
8 Sensitivity was 59.5% and specificity 93.9%. The following background variables were  
9  
10 significantly associated with non-disclosure: lower symptom severity, having a partner, and  
11  
12 lower employee-supervisor relationship quality. Additionally, the following beliefs and  
13  
14 attitudes *pro non-disclosure* were positively associated with non-disclosure: preference for  
15  
16 privacy, preference for self-management, and stigma related concerns. Finally, the following  
17  
18 beliefs and attitudes *pro disclosure* were negatively associated with non-disclosure:  
19  
20 importance given to disclosure advice from others, MHI having impact on occupational  
21  
22 functioning, and feelings of responsibility due to the nature of work.  
23  
24  
25  
26  
27

28 For personnel without MHI, the ordinal logistic regression model with the dependent  
29 variable non-disclosure intention, was statistically significant ( $\chi^2(23)=346.90, p<.001$ ) and  
30 explained 53.5% (Nagelkerke $R^2$ ) of the variance in non-disclosure intention and correctly  
31 classified 66.4% of cases. The following background variables were significantly associated  
32 with non-disclosure intention: not having positive earlier experience with disclosing  
33 something personal to a supervisor, having seen negative experiences of others with  
34 disclosure, and lower employee-supervisor relationship quality. Additionally, the following  
35 beliefs and attitudes *pro non-disclosure* were positively associated with non-disclosure  
36 intentions: preference for privacy, preference for self-management, stigma related concerns  
37 and finding it difficult to talk about MHI. Finally, the following beliefs and attitudes *pro*  
38  
39  
40  
41  
42  
43  
44  
45  
46  
47  
48  
49  
50  
51  
52  
53  
54  
55  
56  
57  
58  
59  
60  
*disclosure* were negatively associated with non-disclosure intentions: supervisor who takes  
MHI seriously, needing work accommodations, wanting to be authentic self, and wanting to  
be an example to others with MHI. All results with statistics can be found in Table 3.

[INSERT TABLE 3]

## Discussion

The current study aimed to examine beliefs, attitudes, and needs associated with (non-)disclosure to a supervisor in the military. Non-disclosure was associated with higher stigma related concerns, a higher preference for privacy and self-management, and a lower supervisor-employee relationship. A quarter of personnel with MHI had not disclosed their MHI to their supervisor, and those who had disclosed, appeared to do so after a considerable delay. Important reasons for disclosure were that personnel wanted to be their true and authentic self and thought disclosure was important due to the responsible nature of their work. To consider disclosure, most personnel indicated they would need a supervisor who shows understanding for MHI. Moreover, over 80% expressed a need for advice about the best ways to disclose.

We identified that although the majority of personnel with MHI had disclosed to their supervisor, they appeared to do so after a considerable delay. Those who disclosed had higher symptom severity than non-disclosers and the majority disclosed because they had to call in sick (46.9%) or had needed treatment during work hours (69.0%). This appears to be even more so the case for military personnel, compared to civilians. A study on disclosure among Dutch workers in general showed that 15.6% disclosed due to having to report sick, and 39.9% disclosed due to needing treatment during work (18). This is in line with ‘the model of employee decision-making about disclosure of a mental disorder at work’, which proposes a default position of non-disclosure and that a triggering incident is needed for disclosure – in this case, having to call in sick or needing treatment (16). This late disclosure causes missed opportunities for workplace support and work accommodations which can prevent worsened symptoms and sick leave (1, 31, 32).

1  
2  
3 Stigma related concerns form a barrier for (early-)disclosure. Half of those who had  
4 not disclosed, saw themselves as weak for having MHI, experienced shame, and a third  
5 feared gossip, negative career consequences, social rejection, and discrimination. These  
6 stigma related concerns were significantly associated both with non-disclosure intentions and  
7 decisions. Stigma has been found to be a barrier to disclosure before, both in military, other  
8 trauma-prone occupations, and civilian populations (5, 6, 16, 33, 34). When comparing the  
9 results of the current study to a study among Dutch civilian workers, it should be noted that  
10 of military personnel who had not disclosed, half reported seeing themselves as weak and  
11 being ashamed, compared to only 13.5% of civilians (18). Concerns about stigma thus appear  
12 to be stronger within the military setting compared to civilian settings. These higher concerns  
13 of stigma are likely caused by the military workplace culture and the responsible work nature,  
14 where people are expected to be 'strong' (6, 8). It should be noted that the study among  
15 civilians predominantly included females, while the current study predominantly included  
16 males, which might also account for some of the differences (18). Future research into  
17 destigmatizing interventions is needed, as up to now only a few, especially in the military,  
18 rigorous destigmatizing intervention studies have been conducted (1). Trauma risk  
19 management (TRiM) is a promising destigmatizing program within (military) organizational  
20 settings, as it has shown to improve attitudes towards MHI (35). To facilitate disclosure,  
21 stigma should also be targeted at a policy level, to take away some of the fears personnel face  
22 (6).

23  
24  
25  
26  
27  
28  
29  
30  
31  
32  
33  
34  
35  
36  
37  
38  
39  
40  
41  
42  
43  
44  
45  
46  
47  
48  
49 The preference for self-management also forms a barrier for (early-)disclosure.  
50  
51 Although disclosure rates are comparable to earlier research among Dutch workers in general  
52 (17, 18), the reasons for non-disclosure differ. Of the non-disclosers, 87.3% reported a  
53 preference for self-management, compared to 44.9% of civilians. This is likely also caused by  
54 the military workplace culture, where people are expected to have a 'can-do' problem fixing  
55  
56  
57  
58  
59  
60

1  
2  
3 mentality (6). To target this preference for self-management, self-help apps or personal  
4 recovery programs could provide personnel the opportunity to manage their own MHI,  
5  
6 possibly giving them more confidence in disclosing and a feeling of control, as they are  
7  
8 already working on their MHI (36). This could also be done through easily accessible care  
9  
10 from for example a social worker. Additionally, decision aids and programs could be  
11  
12 implemented, as personnel indicated this as a need, and it can positively influence sustainable  
13  
14 employability and coping with stigma (37-40).  
15  
16  
17  
18

19 To facilitate (early-)disclosure, there is an important role for the supervisor. The  
20 results showed that lower employee-supervisor relationship quality was associated both with  
21 non-disclosure decision and intention. Having seen negative experiences of others with  
22 disclosure, was the second strongest predictor of non-disclosure intentions, indicating the  
23 importance of how others, including supervisors, respond to disclosure. It is also important  
24 that military personnel with positive experiences with disclosure, communicate openly about  
25 these experiences. The previous qualitative study in the Dutch military (6), and a study  
26 among Dutch workers in general (18), also showed the importance of supervisor relationships  
27 and support (6). Supervisor attitudes towards MHI and knowledge of MHI have also been  
28 found to be associated with whether employees disclose to the supervisor themselves, or that  
29 the supervisor finds out some other way (41). Finally, supervisor support was not only found  
30 to be important for disclosure, but also for treatment seeking for MHI, a decision which is  
31 also of influence on sustainable employability (10). To facilitate (early-)disclosure, training  
32 may be needed for supervisors to improve understanding and support of MHI needs (42).  
33  
34 Additionally, supervisor relationship quality could be addressed, for example by adjusting the  
35 obligated job rotation every 3 years, giving personnel longer to build a relationship with their  
36 supervisor.  
37  
38  
39  
40  
41  
42  
43  
44  
45  
46  
47  
48  
49  
50  
51  
52  
53  
54  
55  
56  
57  
58  
59  
60

### Strengths and limitations

The strengths of this study included the large sample and inclusion of a group that is usually hard to study (participants who have not disclosed). Additionally, the study included both personnel with and without MHI, providing insights for interventions for personnel who may develop MHI in the future. Finally, the study examined disclosure in the military where little research has been done on this topic.

As for limitations, the sample was not representative for the entire military, due to the sampling method. This method also caused the sample to include only personnel who have been on deployment. This group might have had more positive attitudes towards MHI and disclosure due to mental health training related to deployment (35). Also, despite stratification, the current study included a sample of older, higher educated, and higher-ranking personnel. Comparisons showed that lower ranking and lower educated personnel were less likely to have completed the questionnaire once started. Majority of dropouts occurred during the mental health questions. Possibly these questions were hard to answer, or there were anonymity concerns. Additionally, drop-out might have been higher due to the use of forced response. Previous research has shown that younger and lower educated workers disclosed less (18), so disclosure rates in the current study might be an overestimation of the true rates. Also, due to the cross-sectional design of the study, no causality can be presumed. Furthermore, it should be noted that the questionnaire assessing attitudes, beliefs and needs regarding disclosure, has not been validated. It was developed specifically for the current study.

### Conclusion

To better facilitate (early-)disclosure of MHI to a supervisor, there is a need for several changes within the military. First, destigmatizing interventions and policies are

1  
2  
3 needed to create a culture change where personnel do not feel shame for having MHI, and do  
4 not have to fear that stigma and discrimination negatively affect their careers and wellbeing at  
5 work. Second, offered early interventions should align with the preference for self-  
6 management. Third, our results strongly suggest a need to train supervisors to recognize, and  
7 effectively communicate with, personnel with MHI and to improve employee-supervisor  
8 relationships. Together this could facilitate (early-)disclosure which may optimize  
9 opportunities for the provision of workplace support and accommodations, which in turn can  
10 increase the chance of recovery and sustainable employment.  
11  
12  
13  
14  
15  
16  
17  
18  
19  
20  
21  
22  
23  
24  
25  
26  
27  
28  
29  
30  
31  
32  
33  
34  
35  
36  
37  
38  
39  
40  
41  
42  
43  
44  
45  
46  
47  
48  
49  
50  
51  
52  
53  
54  
55  
56  
57  
58  
59  
60

## Tables & Figures

**Table 1. Characteristics of the sample separated by military personnel with and without mental health issues or illness (MHI).**

|                                      | Military personnel with MHI  |                                 |                         | Military personnel without MHI            |                                              |                         |
|--------------------------------------|------------------------------|---------------------------------|-------------------------|-------------------------------------------|----------------------------------------------|-------------------------|
|                                      | Disclosure<br>N=245<br>N (%) | Non-disclosure<br>N=79<br>N (%) | Total<br>N=324<br>N (%) | Disclosure<br>intention<br>N=467<br>N (%) | Non-disclosure<br>intention<br>N=87<br>N (%) | Total<br>N=554<br>N (%) |
| <b>Demographics</b>                  |                              |                                 |                         |                                           |                                              |                         |
| Sex                                  |                              |                                 |                         |                                           |                                              |                         |
| Male                                 | 215 (87.8)                   | 68 (86.1)                       | 283 (87.4)              | 430 (92.1)                                | 79 (90.8)                                    | 509 (91.9)              |
| Female                               | 30 (12.2)                    | 11 (13.9)                       | 41 (12.7)               | 37 (7.9)                                  | 8 (9.2)                                      | 45 (8.1)                |
| Age                                  |                              |                                 |                         |                                           |                                              |                         |
| <20                                  | 0 (0.0)                      | 0 (0.0)                         | 0 (0.0)                 | 0 (0.0)                                   | 0 (0.0)                                      | 0 (0.0)                 |
| 21-30                                | 15 (6.1)                     | 12 (15.2)                       | 27 (8.3)                | 55 (11.8)                                 | 10 (11.5)                                    | 65 (11.7)               |
| 31-40                                | 81 (33.1)                    | 26 (32.9)                       | 107 (33.0)              | 149 (31.9)                                | 41 (47.1)                                    | 190 (34.3)              |
| 41-50                                | 76 (31.0)                    | 19 (24.1)                       | 95 (29.3)               | 134 (28.7)                                | 18 (20.7)                                    | 152 (27.4)              |
| 51-60                                | 68 (27.8)                    | 21 (26.6)                       | 89 (27.5)               | 119 (25.5)                                | 17 (19.5)                                    | 136 (24.6)              |
| >60                                  | 5 (2.0)                      | 1 (1.3)                         | 6 (1.9)                 | 10 (2.1)                                  | 1 (1.2)                                      | 11 (2.0)                |
| Marital Status                       |                              |                                 |                         |                                           |                                              |                         |
| Partner (vs. Single)                 | <b>183 (74.7)</b>            | <b>69 (87.3)</b>                | <b>252 (77.8)</b>       | 394 (84.4)                                | 76 (87.4)                                    | 470 (84.8)              |
| Educational Level                    |                              |                                 |                         |                                           |                                              |                         |
| Low                                  | 26 (10.6)                    | 4 (5.1)                         | 30 (9.3)                | 49 (10.5)                                 | 2 (2.3)                                      | 51 (9.2)                |
| Medium                               | 136 (55.5)                   | 39 (49.4)                       | 175 (54.0)              | 242 (51.8)                                | 48 (55.2)                                    | 290 (52.4)              |
| High                                 | 83 (33.9)                    | 36 (45.6)                       | 119 (36.7)              | 176 (37.7)                                | 37 (42.5)                                    | 213 (38.5)              |
| <b>Work related context</b>          |                              |                                 |                         |                                           |                                              |                         |
| Type of work                         |                              |                                 |                         |                                           |                                              |                         |
| Operational work                     | 188 (76.7)                   | 67 (84.8)                       | 255 (78.7)              | 258 (55.3)                                | 50 (57.5)                                    | 308 (55.6)              |
| Military branch                      |                              |                                 |                         |                                           |                                              |                         |
| Marine                               | 20 (8.2)                     | 2 (2.5)                         | 22 (6.8)                | 75 (16.1)                                 | 16 (18.4)                                    | 91 (16.4)               |
| Army                                 | 119 (48.6)                   | 47 (59.5)                       | 166 (51.2)              | 196 (42.0)                                | 40 (46.0)                                    | 236 (42.6)              |
| Air-force                            | 69 (28.2)                    | 15 (19.0)                       | 84 (25.9)               | 120 (25.7)                                | 15 (17.2)                                    | 135 (24.4)              |
| Military-police                      | 16 (6.5)                     | 4 (5.1)                         | 20 (6.2)                | 21 (4.5)                                  | 5 (5.7)                                      | 26 (4.7)                |
| Staff                                | 20 (8.2)                     | 11 (13.9)                       | 31 (9.6)                | 53 (11.3)                                 | 11 (12.6)                                    | 64 (11.6)               |
| Other                                | 1 (.4)                       | 0 (0.0)                         | 1 (.3)                  | 2 (.4)                                    | 0 (0.0)                                      | 2 (.4)                  |
| Ranks                                |                              |                                 |                         |                                           |                                              |                         |
| Military personnel                   | 29 (11.8)                    | 15 (19.0)                       | 44 (13.6)               | 26 (5.6)                                  | 8 (9.2)                                      | 34 (6.1)                |
| Non-commissioned officers            | 132 (53.9)                   | 33 (41.8)                       | 165 (50.9)              | 225 (48.2)                                | 32 (36.8)                                    | 257 (46.4)              |
| Officers                             | 84 (34.3)                    | 31 (39.2)                       | 115 (35.5)              | 216 (46.3)                                | 47 (54.0)                                    | 263 (47.5)              |
| Years of service (M (SD))            |                              |                                 |                         |                                           |                                              |                         |
| Years                                | 22.25 (9.08)                 | 21.42 (9.92)                    | 22.05 (9.28)            | 22.20 (9.62)                              | 20.11 (9.98)                                 | 21.86 (9.70)            |
| <b>Mental health related context</b> |                              |                                 |                         |                                           |                                              |                         |
| Past or current (self-reported) MHI  |                              |                                 |                         |                                           |                                              |                         |
| Past MHI                             | 194 (79.2)                   | 62 (78.5)                       | 256 (79.0)              | N/A                                       | N/A                                          | N/A                     |
| MHI work related                     |                              |                                 |                         |                                           |                                              |                         |
| Yes                                  | 167 (68.2)                   | 48 (60.8)                       | 215 (66.4)              | N/A                                       | N/A                                          | N/A                     |
| Severity of symptoms                 |                              |                                 |                         |                                           |                                              |                         |
| Mean severity (M, SD)                | <b>7.38 (1.87)</b>           | <b>6.01 (2.07)</b>              | <b>7.05 (2.01)</b>      | N/A                                       | N/A                                          | N/A                     |

Note: Military personnel with MHI were asked about their type of work and rank at the time their MHI started.



1  
2  
3  
4  
5  
6  
7  
8  
9  
10  
11  
12  
13  
14  
15  
16  
17  
18  
19  
20  
21  
22  
23  
24  
25  
26  
27  
28  
29  
30  
31  
32  
33  
34  
35  
36  
37  
38  
39  
40  
41  
42  
43  
44  
45  
46  
47  
48  
49  
50  
51  
52  
53  
54  
55  
56  
57  
58  
59  
60

For peer review only

**Table 2. Beliefs and attitudes regarding disclosure to a supervisor for military personnel with and without mental health issues and illness (MHI)**

| Beliefs and attitudes                                                                  | Military personnel with MHI |                    |             |                       |             |            |       | Military personnel without MHI |                              |            |                                 |            |            |       |
|----------------------------------------------------------------------------------------|-----------------------------|--------------------|-------------|-----------------------|-------------|------------|-------|--------------------------------|------------------------------|------------|---------------------------------|------------|------------|-------|
|                                                                                        | Total (N=324)               | Disclosure (N=245) |             | Non-Disclosure (N=79) |             | Difference |       | Total (N=554)                  | Disclosure intention (N=467) |            | Non-disclosure intention (N=87) |            | Difference |       |
|                                                                                        | N (%)                       | N (%)              | M (SD)      | N (%)                 | M (SD)      | Z          | Sig.  | N (%)                          | N (%)                        | M(SD)      | N (%)                           | M (SD)     | Z          | Sig.  |
| <b>Pro non-disclosure</b>                                                              |                             |                    |             |                       |             |            |       |                                |                              |            |                                 |            |            |       |
| The preference to solve one's own problems.                                            | 239 (73.8)                  | 170 (69.4)         | 2.70 (.78)  | 69 (87.3)             | 3.13 (.76)  | -4.79      | <.001 | 361 (65.2)                     | 284 (60.8)                   | 2.58 (.75) | 77 (88.5)                       | 3.10 (.65) | -6.05      | <.001 |
| Finding it difficult to talk about MHI.                                                | 214 (66.1)                  | 154 (62.9)         | 2.62 (.84)  | 60 (76.0)             | 2.86 (.80)  | -2.28      | .023  | 212 (38.3)                     | 156 (33.4)                   | 2.20 (.76) | 56 (64.4)                       | 2.76 (.78) | -5.93      | <.001 |
| Preference that MHI remains private.                                                   | 189 (58.3)                  | 124 (50.6)         | 2.49 (.77)  | 65 (82.3)             | 3.05 (.75)  | -5.55      | <.001 | 328 (59.2)                     | 252 (54.0)                   | 2.58 (.78) | 76 (87.4)                       | 3.22 (.72) | -6.89      | <.001 |
| Seeing yourself as weak due to MHI.                                                    | 170 (52.5)                  | 125 (51.0)         | 2.44 (.96)  | 45 (57.0)             | 2.52 (.99)  | -.69       | .489  | 146 (26.4)                     | 95 (20.3)                    | 1.90 (.74) | 51 (58.6)                       | 2.49 (.79) | -6.46      | <.001 |
| Being ashamed of the MHI.                                                              | 159 (49.1)                  | 121 (49.4)         | 2.40 (.96)  | 38 (48.1)             | 2.47 (1.00) | -.47       | .636  | 129 (23.3)                     | 85 (18.2)                    | 1.89 (.71) | 44 (50.6)                       | 2.39 (.84) | -5.41      | <.001 |
| Fearing gossip as result of disclosure.                                                | 124 (38.3)                  | 97 (39.6)          | 2.24 (.91)  | 27 (34.2)             | 2.18 (.89)  | -.60       | .547  | 118 (21.3)                     | 72 (15.4)                    | 1.88 (.68) | 46 (52.9)                       | 2.63 (.85) | -7.69      | <.001 |
| Fearing negative career consequences as result of disclosure.                          | 114 (35.2)                  | 86 (35.1)          | 2.11 (.94)  | 28 (35.4)             | 2.16 (.97)  | -.41       | .680  | 135 (24.4)                     | 86 (18.4)                    | 1.90 (.73) | 49 (56.3)                       | 2.55 (.89) | -6.57      | <.001 |
| Unemployment.                                                                          | 35 (N/A)                    | 28 (N/A)           | N/A         | 7 (N/A)               | N/A         | N/A        | N/A   | 28 (N/A)                       | 19 (N/A)                     | N/A        | 9 (N/A)                         | N/A        | N/A        | N/A   |
| Not being able to be promoted to future career steps.                                  | 83 (N/A)                    | 62 (N/A)           | N/A         | 21 (N/A)              | N/A         | N/A        | N/A   | 94 (N/A)                       | 61 (N/A)                     | N/A        | 33 (N/A)                        | N/A        | N/A        | N/A   |
| Not being able to do work tasks anymore that one likes best.                           | 75 (N/A)                    | 59 (N/A)           | N/A         | 16 (N/A)              | N/A         | N/A        | N/A   | 67 (N/A)                       | 43 (N/A)                     | N/A        | 24 (N/A)                        | N/A        | N/A        | N/A   |
| Fearing others will see you differently (negatively) as result of disclosure.          | 107 (33.0)                  | 83 (33.9)          | 2.15 (.85)  | 24 (30.4)             | 2.10 (.84)  | -.48       | .633  | 114 (20.6)                     | 71 (15.2)                    | 1.90 (.65) | 43 (49.4)                       | 2.47 (.82) | -6.35      | <.001 |
| Fearing being treated differently (less well) as results of disclosure.                | 92 (28.4)                   | 69 (28.2)          | 2.07 (.81)  | 23 (29.1)             | 2.06 (.82)  | -.05       | .963  | 90 (16.3)                      | 56 (12.0)                    | 1.83 (.64) | 34 (39.1)                       | 2.31 (.75) | -5.68      | <.001 |
| Fearing others see MHI as one's own fault.                                             | 87 (26.9)                   | 63 (25.7)          | 1.99 (.83)  | 24 (30.4)             | 2.04 (.91)  | -.27       | .785  | 52 (9.4)                       | 33 (7.1)                     | 1.65 (.62) | 19 (21.8)                       | 1.95 (.73) | -3.68      | <.001 |
| Fearing that supervisor would not treat disclosure confidentially.                     | 82 (25.3)                   | 52 (21.2)          | 1.93 (.81)  | 30 (38.0)             | 2.24 (.99)  | -2.42      | .016  | 92 (16.6)                      | 46 (9.9)                     | 1.71 (.65) | 46 (52.9)                       | 2.54 (.91) | -8.14      | <.001 |
| Supervisor is negative about MHI.                                                      | 30 (9.3)                    | 22 (9.0)           | 1.69 (.72)  | 8 (10.1)              | 1.76 (.70)  | -.97       | .330  | 27 (4.9)                       | 11 (2.4)                     | 1.52 (.58) | 16 (18.4)                       | 1.98 (.70) | -5.95      | <.001 |
| No choice, supervisor already heard from someone else.                                 | 5 (N/A)                     | N/A                | N/A         | 5 (6.3)               | 1.55 (.62)  | N/A        | N/A   | N/A                            | N/A                          | N/A        | N/A                             | N/A        | N/A        | N/A   |
| <b>Pro disclosure</b>                                                                  |                             |                    |             |                       |             |            |       |                                |                              |            |                                 |            |            |       |
| Importance of being your true self.                                                    | 310 (95.7)                  | 238 (97.1)         | 3.33 (.56)  | 72 (91.1)             | 3.20 (.63)  | -1.49      | .135  | 509 (91.2)                     | 430 (92.1)                   | 3.34 (.68) | 79 (90.8)                       | 3.18 (.66) | -2.32      | .020  |
| Supervisor who takes MHI seriously.                                                    | 267 (82.4)                  | 207 (84.5)         | 3.11 (.79)  | 60 (76.0)             | 2.90 (.61)  | -2.88      | .004  | 486 (87.7)                     | 426 (91.2)                   | 3.28 (.74) | 60 (69.0)                       | 2.83 (.78) | -5.42      | <.001 |
| Disclosure important due to the responsibility associated with the nature of the work. | 242 (74.7)                  | 209 (85.3)         | 3.04 (.65)  | 33 (41.8)             | 2.35 (.75)  | -7.26      | <.001 | 500 (90.3)                     | 438 (93.8)                   | 3.28 (.59) | 62 (71.3)                       | 2.86 (.81) | -4.71      | <.001 |
| Military has policy which provides good solutions for those with MHI.                  | 234 (72.2)                  | 179 (73.1)         | 2.81 (.79)  | 55 (69.6)             | 2.77 (.83)  | -.38       | .707  | 487 (87.9)                     | 422 (90.4)                   | 3.09 (.55) | 65 (74.7)                       | 2.79 (.70) | -3.86      | <.001 |
| Importance of whether MHI effects occupational functioning.                            | 226 (69.8)                  | 193 (78.8)         | 3.02 (.78)  | 33 (41.8)             | 2.33 (.87)  | -6.15      | <.001 | 414 (74.7)                     | 342 (73.2)                   | 2.79 (.75) | 72 (82.8)                       | 2.98 (.68) | -2.11      | .035  |
| Wanting to be a good example to others.                                                | 146 (45.1)                  | 121 (49.4)         | 2.44 (.83)  | 25 (31.7)             | 2.18 (.69)  | -2.61      | .009  | 373 (67.3)                     | 341 (73.0)                   | 2.88 (.73) | 32 (36.8)                       | 2.23 (.80) | -6.85      | <.001 |
| Importance of needing work accommodations.                                             | 141 (43.5)                  | 129 (52.7)         | 2.44 (.95)  | 12 (15.2)             | 1.72 (.88)  | -5.86      | <.001 | 348 (62.8)                     | 303 (64.9)                   | 2.68 (.75) | 45 (51.7)                       | 2.51 (.83) | -2.02      | .044  |
| The importance of advice from others for disclosure.                                   | 62 (19.1)                   | 55 (22.5)          | 1.91 (.77)  | 7 (8.9)               | 1.63 (.64)  | -2.73      | .006  | 356 (64.3)                     | 302 (64.7)                   | 2.63 (.77) | 54 (62.1)                       | 2.52 (.71) | -1.24      | .216  |
| No choice, supervisor could see it.                                                    | 95 (N/A)                    | 95 (38.8)          | 2.23 (.89)  | N/A                   | N/A         | N/A        | N/A   | N/A                            | N/A                          | N/A        | N/A                             | N/A        | N/A        | N/A   |
| No choice, I had to report sick.                                                       | 115 (N/A)                   | 115 (46.9)         | 2.39 (1.04) | N/A                   | N/A         | N/A        | N/A   | N/A                            | N/A                          | N/A        | N/A                             | N/A        | N/A        | N/A   |
| No choice, I needed treatment during work.                                             | 169 (N/A)                   | 169 (69.0)         | 2.78 (.91)  | N/A                   | N/A         | N/A        | N/A   | N/A                            | N/A                          | N/A        | N/A                             | N/A        | N/A        | N/A   |

Note: A Bonferroni correction was used, with  $\alpha = .05/20 = .003$

Note: For comparison between disclosure intentions of military personnel without MHI, 'very-unlikely' and 'unlikely' were combined, just as 'likely' and 'very-likely'.

**Table 3. Logistic and ordinal regressions for the non-disclosure decision and intention to a supervisor.**

|                                                                  | Military personnel with mental health issues or illness<br>(0=disclosure, 1=non-disclosure) |            |              |             |                     |                 | Military personnel without mental health issues or illness<br>(Disclosure 1=very likely, 2=likely, 3=(very)unlikely) |             |              |             |                       |                 |
|------------------------------------------------------------------|---------------------------------------------------------------------------------------------|------------|--------------|-------------|---------------------|-----------------|----------------------------------------------------------------------------------------------------------------------|-------------|--------------|-------------|-----------------------|-----------------|
|                                                                  | B                                                                                           | SE         | Wald         | OR          | CI 95%              | Sig.            | B                                                                                                                    | SE          | Wald         | OR          | CI 95%                | Sig.            |
| Constant                                                         | 4.23                                                                                        | 2.44       | 3.01         | 68.71       | N/A                 | .083            | N/A                                                                                                                  | N/A         | N/A          | N/A         | N/A                   | N/A             |
| Threshold: = 3 ((very) unlikely)                                 | N/A                                                                                         | N/A        | N/A          | N/A         | N/A                 | N/A             | <b>-8.63</b>                                                                                                         | <b>1.61</b> | <b>28.74</b> | <b>.00</b>  | <b>[7.62E-6 -.00]</b> | <b>&lt;.001</b> |
| Threshold: = 2 (likely)                                          | N/A                                                                                         | N/A        | N/A          | N/A         | N/A                 | N/A             | <b>-5.15</b>                                                                                                         | <b>1.57</b> | <b>10.74</b> | <b>.01</b>  | <b>[.00-.13]</b>      | <b>.001</b>     |
| <b>Health</b>                                                    |                                                                                             |            |              |             |                     |                 |                                                                                                                      |             |              |             |                       |                 |
| Higher symptom severity                                          | <b>-.33</b>                                                                                 | <b>.10</b> | <b>12.27</b> | <b>.72</b>  | <b>[-.59-.86]</b>   | <b>&lt;.001</b> | N/A                                                                                                                  | N/A         | N/A          | N/A         | N/A                   | N/A             |
| <b>Demographics and experience</b>                               |                                                                                             |            |              |             |                     |                 |                                                                                                                      |             |              |             |                       |                 |
| Gender (female, vs. male)                                        | -.08                                                                                        | .56        | .02          | .92         | [-.31-2.76]         | .882            | -.52                                                                                                                 | .38         | 1.87         | .60         | [-.28-1.25]           | .172            |
| Marital status (partner, vs. single)                             | <b>1.27</b>                                                                                 | <b>.54</b> | <b>5.52</b>  | <b>3.58</b> | <b>[1.24-10.36]</b> | <b>.019</b>     | -.18                                                                                                                 | .28         | .42          | .84         | [-.48-1.44]           | .518            |
| Higher age                                                       | -.19                                                                                        | .19        | .93          | .83         | [-.57-1.21]         | .336            | -.13                                                                                                                 | .10         | 1.66         | .88         | [-.72-1.07]           | .197            |
| More familiarity with mental health issues or illness            | .10                                                                                         | .12        | .64          | 1.10        | [-.87-1.39]         | .424            | -.14                                                                                                                 | .07         | 3.73         | .87         | [-.76-1.00]           | .054            |
| Earlier experience disclosing to a supervisor                    |                                                                                             |            |              |             |                     |                 |                                                                                                                      |             |              |             |                       |                 |
| Negative                                                         | -.86                                                                                        | .75        | 1.34         | .42         | [-.10-1.83]         | .248            | -.41                                                                                                                 | .76         | .30          | .66         | [-.15-2.93]           | .586            |
| Positive                                                         | -.72                                                                                        | .70        | 1.07         | .49         | [-.12-1.91]         | .301            | <b>-.54</b>                                                                                                          | <b>.25</b>  | <b>4.68</b>  | <b>.59</b>  | <b>[-.36-.95]</b>     | <b>.031</b>     |
| None                                                             | 0                                                                                           | 0          | 2.22         | 0           | 0                   | .329            | 0                                                                                                                    | 0           | 0            | 1           | 0                     | 0               |
| Seen experience of others with disclosure                        |                                                                                             |            |              |             |                     |                 |                                                                                                                      |             |              |             |                       |                 |
| Negative                                                         | .29                                                                                         | .59        | .24          | 1.34        | [-.42-4.24]         | .623            | <b>1.12</b>                                                                                                          | <b>.38</b>  | <b>8.52</b>  | <b>3.07</b> | <b>[1.45-6.52]</b>    | <b>.004</b>     |
| Positive                                                         | .40                                                                                         | .54        | .55          | 1.49        | [-.52-4.29]         | .458            | -.09                                                                                                                 | .21         | .18          | .92         | [-.61-1.38]           | .672            |
| None                                                             | 0                                                                                           | 0          | .68          | 0           | 0                   | .713            | 0                                                                                                                    | 0           | 0            | 1           | 0                     | 0               |
| <b>Work context</b>                                              |                                                                                             |            |              |             |                     |                 |                                                                                                                      |             |              |             |                       |                 |
| Rank                                                             | -.29                                                                                        | .29        | 1.05         | .75         | [-.43-1.31]         | .305            | .31                                                                                                                  | .17         | 3.           | 3.18        | [-.97-1.90]           | .074            |
| Unit cohesion                                                    | .17                                                                                         | .23        | .55          | 1.19        | [-.76-1.86]         | .459            | -.02                                                                                                                 | .13         | .03          | .98         | [-.75-1.27]           | .870            |
| Relationship quality supervisor                                  | <b>-.76</b>                                                                                 | <b>.32</b> | <b>5.73</b>  | <b>.47</b>  | <b>[-.25-.87]</b>   | <b>.017</b>     | <b>-1.39</b>                                                                                                         | <b>.27</b>  | <b>27.14</b> | <b>.25</b>  | <b>[-.15-.42]</b>     | <b>&lt;.001</b> |
| <b>Beliefs and attitudes</b>                                     |                                                                                             |            |              |             |                     |                 |                                                                                                                      |             |              |             |                       |                 |
| <b>Pro non-disclosure</b>                                        |                                                                                             |            |              |             |                     |                 |                                                                                                                      |             |              |             |                       |                 |
| Preference for privacy                                           | <b>.71</b>                                                                                  | <b>.31</b> | <b>5.40</b>  | <b>2.05</b> | <b>[1.12-3.76]</b>  | <b>.020</b>     | <b>.69</b>                                                                                                           | <b>.15</b>  | <b>22.51</b> | <b>1.99</b> | <b>[1.50-2.65]</b>    | <b>&lt;.001</b> |
| Preference self-management                                       | <b>.58</b>                                                                                  | <b>.30</b> | <b>3.87</b>  | <b>1.79</b> | <b>[1.00-3.20]</b>  | <b>.049</b>     | <b>.49</b>                                                                                                           | <b>.16</b>  | <b>9.57</b>  | <b>1.64</b> | <b>[1.20-2.23]</b>    | <b>.002</b>     |
| Stigma related concerns                                          | <b>.79</b>                                                                                  | <b>.40</b> | <b>4.00</b>  | <b>2.21</b> | <b>[1.02-4.79]</b>  | <b>.046</b>     | <b>.56</b>                                                                                                           | <b>.23</b>  | <b>5.93</b>  | <b>1.76</b> | <b>[1.12-2.77]</b>    | <b>.015</b>     |
| Difficulty talking about mental health issues or illness         | .02                                                                                         | .29        | .00          | 1.02        | [-.57-1.81]         | .952            | <b>.41</b>                                                                                                           | <b>.15</b>  | <b>7.51</b>  | <b>1.51</b> | <b>[1.13-2.03]</b>    | <b>.006</b>     |
| <b>Pro disclosure</b>                                            |                                                                                             |            |              |             |                     |                 |                                                                                                                      |             |              |             |                       |                 |
| Supervisor takes mental health issues or illness seriously       | -.09                                                                                        | .32        | .07          | .92         | [-.50-1.70]         | .787            | <b>-.45</b>                                                                                                          | <b>.14</b>  | <b>9.63</b>  | <b>.64</b>  | <b>[-.48-.85]</b>     | <b>.002</b>     |
| Importance advice others for disclosure                          | <b>-.57</b>                                                                                 | <b>.29</b> | <b>3.94</b>  | <b>.56</b>  | <b>[-.32-.99]</b>   | <b>.047</b>     | -.18                                                                                                                 | .14         | 1.65         | .84         | [-.64-1.10]           | .199            |
| Mental health issues or illness effects occupational functioning | <b>-.90</b>                                                                                 | <b>.27</b> | <b>10.93</b> | <b>.41</b>  | <b>[-.24-.69]</b>   | <b>.001</b>     | -.10                                                                                                                 | .15         | .39          | .91         | [-.68-1.22]           | .531            |
| Responsibility due to nature of work                             | <b>-1.12</b>                                                                                | <b>.29</b> | <b>14.79</b> | <b>.33</b>  | <b>[-.19-.58]</b>   | <b>&lt;.001</b> | -.24                                                                                                                 | .17         | 1.98         | .79         | [-.56-1.10]           | .159            |
| Work accommodations are needed                                   | -.40                                                                                        | .24        | 2.84         | .67         | [-.42-1.07]         | .092            | <b>-.35</b>                                                                                                          | <b>.14</b>  | <b>6.36</b>  | <b>.71</b>  | <b>[-.54-.93]</b>     | <b>.012</b>     |
| Attitude that the military has good policy                       | .27                                                                                         | .24        | 1.30         | 1.31        | [-.82-2.09]         | .254            | -.37                                                                                                                 | .19         | 3.65         | .69         | [-.47-1.01]           | .056            |
| Wanting to be authentic                                          | .04                                                                                         | .34        | .01          | 1.04        | [-.53-2.03]         | .918            | <b>-.50</b>                                                                                                          | <b>.15</b>  | <b>11.33</b> | <b>.61</b>  | <b>[-.46-.81]</b>     | <b>.001</b>     |
| Wanting to be example to others                                  | -.13                                                                                        | .26        | .25          | .88         | [-.53-1.46]         | .619            | <b>-.37</b>                                                                                                          | <b>.15</b>  | <b>6.59</b>  | <b>.69</b>  | <b>[-.52-.92]</b>     | <b>.010</b>     |

*Note: Earlier experiences, both own and others, were each represented as three dummy variables with 'none' serving as the reference group.*

**Figure 1**

**Caption:** Needs regarding future disclosure

**Statements****Contributorship**

**R.I. Bogaers:** As the PhD student on the project, R.I. Bogaers was involved in all aspects of the study. **S.G. Geuze:** Was involved by advising R.I. Bogaers during the formulating of research question(s) and designing the study. Also, he provided multiple rounds of feedback on the manuscript of the paper. **N. Greenberg:** Was involved by advising R.I. Bogaers during designing the study and provided one critical round of feedback on the manuscript of the paper. **F.R.M. Leijten:** Was involved by advising R.I. Bogaers during the formulating of research question(s) and designing the study and provided one critical round of feedback on the manuscript of the paper. **J. van Weeghel:** Was involved by advising R.I. Bogaers during the formulating of research question(s) and designing the study. Also, he provided multiple rounds of feedback on the manuscript of the paper. **H. van de Mheen:** Was involved by advising R.I. Bogaers during the formulating of research question(s) and designing the study and provided one critical round of feedback on the manuscript of the paper. **A.D. Rozema:** Was involved by advising R.I. Bogaers during the formulating of research question(s) and designing the study and provided one critical round of feedback on the manuscript of the paper. **E.P.M. Brouwers: Project leader who wrote the research proposal.** Was involved by advising R.I. Bogaers during the formulating of research question(s) and designing the study. Provided multiple rounds of critical feedback on the manuscript of the paper.

### **Funding statement**

This work was mainly supported by the IMPACT PhD Program 2018 of Tilburg University (no grant number). Additionally, the work was partially supported by a grant from the Dutch Ministry of Defence (no grant number), but this grant did not influence the interpretation of the data; the writing of the paper; or the decision to submit the paper for publication. These funding sources were not involved in study design; analysis and interpretation of data; writing of the report; and in the decision to submit the article for publication.

### **Competing of Interests**

**R.I. Bogaers** reports grants from The Dutch Ministry of Defence, during the conduct of the study. However, this did not influence the interpretation of the data or the decision to submit the paper for publication. **Dr. Geuze** has nothing to disclose. **Prof. Greenberg** is the Royal College of Psychiatrists Lead for Trauma and the Military; however, all views expressed are his own. **Dr. Leijten** is an employee at the Ministry of Defence but this did not influence the interpretation of the data or the decision to submit the paper for publication. **Prof. van Weeghel** has nothing to disclose. **Prof. van de Mheen** has nothing to disclose. **Dr. Rozema** has nothing to disclose. **Prof. Brouwers** reports grants from The Dutch Ministry of Defence, during the conduct of the study. However, this did not influence the interpretation of the data or the decision to submit the paper for publication.

### **Ethics approval**

Written informed consent was obtained from all subjects/patients. The authors assert that all procedures contributing to this work comply with the ethical standards of the relevant national and institutional committees on human experimentation and with the Helsinki Declaration of 1975, as revised in 2008. All procedures involving human subjects/patients

1  
2  
3 were approved by the Tilburg School of Social and Behavioral Sciences Ethics Review  
4  
5 Boards (approval number RP324) and the Dutch Military Ethics Review Board.  
6  
7  
8  
9

## 10 **Data sharing**

11  
12 The data that support the findings of this study are available upon reasonable request from the  
13  
14 corresponding author, R.I. Bogaers.  
15  
16  
17  
18

## 19 **Acknowledgements**

20  
21 We thank the people who participated in this study and shared their personal experiences  
22  
23 with us, giving us insight into this important topic. We also thank the providers of the  
24  
25 funding for this research, the IMPACT PhD Program 2018 of Tilburg University and a grant  
26  
27 from the Dutch Ministry of Defence. Finally, we thank the military research department, and  
28  
29 especially Jolanda Snijders, who helped with participant recruitment.  
30  
31  
32  
33  
34

## 35 **References**

- 36  
37  
38 1. Brouwers EP. Social stigma is an underestimated contributing factor to  
39 unemployment in people with mental illness or mental health issues: position paper and  
40 future directions. *BMC psychology*. 2020;8(1):1-7.  
41 2. Jones AM. Disclosure of mental illness in the workplace: A literature review.  
42 *American Journal of Psychiatric Rehabilitation*. 2011;14(3):212-29.  
43 3. Brohan E, Henderson C, Wheat K, Malcolm E, Clement S, Barley EA, et al.  
44 Systematic review of beliefs, behaviours and influencing factors associated with disclosure of  
45 a mental health problem in the workplace. *BMC Psychiatry*. 2012;12(1):11.  
46 4. Van Beukering I, Smits S, Janssens K, Bogaers R, Joosen M, Bakker M, et al. In what  
47 ways does health related stigma affect sustainable employment and well-being at work? A  
48 systematic review. *Journal of Occupational Rehabilitation*. 2021:1-15.  
49 5. Brouwers E, Joosen M, van Zelst C, Van Weeghel J. To Disclose or Not to Disclose:  
50 A Multi-stakeholder Focus Group Study on Mental Health Issues in the Work Environment.  
51 *Journal of Occupational Rehabilitation*. 2019:1-9.  
52 6. Bogaers R, Geuze E, Van Weeghel J, Leijten F, Rüsç N, Van De Mheen D, et al.  
53 Decision (not) to disclose mental health conditions or substance abuse in the work  
54 environment: a multiperspective focus group study within the military. *BMJ Open*.  
55 2021;11(10):e049370.  
56 7. Gignac MA, Jetha A, Ginis KAM, Ibrahim S. Does it matter what your reasons are  
57 when deciding to disclose (or not disclose) a disability at work? The association of workers'  
58  
59  
60

- 1  
2  
3 approach and avoidance goals with perceived positive and negative workplace outcomes.  
4 *Journal of Occupational Rehabilitation*. 2021:1-14.
- 5  
6 8. Stergiou-Kita M, Mansfield E, Bezo R, Colantonio A, Garritano E, Lafrance M, et al.  
7 Danger zone: Men, masculinity and occupational health and safety in high risk occupations.  
8 *Safety science*. 2015;80:213-20.
- 9  
10 9. van der Wal SJ, Gorter R, Reijnen A, Geuze E, Vermetten E. Cohort profile: The  
11 prospective research in stress-related military operations (PRISMO) study in the Dutch armed  
12 forces. *BMJ open*. 2019;9(3):e026670.
- 13  
14 10. Bogaers R, Geuze E, van Weeghel J, Leijten F, van de Mheen D, Varis P, et al.  
15 Barriers and facilitators for treatment-seeking for mental health conditions and substance  
16 misuse: multi-perspective focus group study within the military. *BJPsych open*. 2020;6(6).
- 17  
18 11. Rüsçh N, Rose C, Holzhausen F, Mulfinger N, Krumm S, Corrigan PW, et al.  
19 Attitudes towards disclosing a mental illness among German soldiers and their comrades.  
20 *Psychiatry Research*. 2017;258:200-6.
- 21  
22 12. Bogaers R, Geuze E, Greenberg N, Leijten F, Varis P, van Weeghel J, et al. Seeking  
23 treatment for mental illness and substance abuse: a cross-sectional study on attitudes, beliefs,  
24 and needs of military personnel with and without mental illness. *Journal of Psychiatric*  
25 *Research*. 2022.
- 26  
27 13. Hastuti R, Timming AR. An inter-disciplinary review of the literature on mental  
28 illness disclosure in the workplace: implications for human resource management. *The*  
29 *International Journal of Human Resource Management*. 2021:1-37.
- 30  
31 14. Toth KE, Yvon F, Villotti P, Lecomte T, Lachance J-P, Kirsh B, et al. Disclosure  
32 dilemmas: how people with a mental health condition perceive and manage disclosure at  
33 work. *Disability and Rehabilitation*. 2021:1-11.
- 34  
35 15. Stratton E, Einboden R, Ryan R, Choi I, Harvey SB, Glozier N. Deciding to Disclose  
36 a Mental Health Condition in Male Dominated Workplaces; a Focus-Group Study. *Frontiers*  
37 *in psychiatry*. 2018;9.
- 38  
39 16. Toth KE, Dewa CS. Employee decision-making about disclosure of a mental disorder  
40 at work. *Journal of Occupational Rehabilitation*. 2014;24(4):732-46.
- 41  
42 17. Dewa CS, Van Weeghel J, Joosen MC, Brouwers EP. What could influence workers'  
43 decisions to disclose a mental illness at work? *The International Journal of Occupational and*  
44 *Environmental Medicine*. 2020;11(3):119.
- 45  
46 18. Dewa CS, Van Weeghel J, Joosen MC, Gronholm PC, Brouwers EP. Workers'  
47 decisions to disclose a mental health issue to managers and the consequences. *Frontiers in*  
48 *Psychiatry*. 2021:311.
- 49  
50 19. Brohan E, Henderson C, Wheat K, Malcolm E, Clement S, Barley EA, et al.  
51 Systematic review of beliefs, behaviours and influencing factors associated with disclosure of  
52 a mental health problem in the workplace. *BMC Psychiatry*. 2012;12(1):1-14.
- 53  
54 20. Von Elm E, Altman DG, Egger M, Pocock SJ, Gøtzsche PC, Vandenbroucke JP. The  
55 Strengthening the Reporting of Observational Studies in Epidemiology (STROBE) statement:  
56 guidelines for reporting observational studies. *Bulletin of the World Health Organization*.  
57 2007;85:867-72.
- 58  
59 21. Smarr KL, Keefer AL. Measures of depression and depressive symptoms: beck  
60 depression inventory-II (BDI-II), Center for Epidemiologic Studies Depression Scale  
(CES-D), geriatric depression scale (GDS), hospital anxiety and depression scale (HADS),  
and patient health Questionnaire-9 (PHQ-9). *Arthritis care & research*. 2011;63(S11):S454-  
S66.
22. Ali R, Meena S, Eastwood B, Richards I, Marsden J. Ultra-rapid screening for  
substance-use disorders: the Alcohol, Smoking and Substance Involvement Screening Test  
(ASSIST-Lite). *Drug and alcohol dependence*. 2013;132(1-2):352-61.



- 1  
2  
3 23. Bradley KA, DeBenedetti AF, Volk RJ, Williams EC, Frank D, Kivlahan DR.  
4 AUDIT-C as a brief screen for alcohol misuse in primary care. *Alcoholism: Clinical and*  
5 *Experimental Research*. 2007;31(7):1208-17.  
6  
7 24. Weathers FW, Litz BT, Keane TM, Palmieri PA, Marx BP, Schnurr PP. The ptsd  
8 checklist for dsm-5 (pcl-5). Scale available from the National Center for PTSD at www ptsd  
9 va gov. 2013;10.  
10  
11 25. Janssens KM, van Weeghel J, Dewa C, Henderson C, Mathijssen JJ, Joosen MC, et al.  
12 Line managers' hiring intentions regarding people with mental health problems: a cross-  
13 sectional study on workplace stigma. *Occupational and Environmental Medicine*. 2021.  
14  
15 26. Holmes EP, Corrigan PW, Williams P, Canar J, Kubiak MA. Changing attitudes  
16 about schizophrenia. *Schizophrenia bulletin*. 1999;25(3):447-56.  
17  
18 27. van Boekel LC, Brouwers EP, van Weeghel J, Garretsen HF. Comparing stigmatising  
19 attitudes towards people with substance use disorders between the general public, GPs,  
20 mental health and addiction specialists and clients. *International Journal of Social Psychiatry*.  
21 2015;61(6):539-49.  
22  
23 28. Wright KM, Cabrera OA, Bliese PD, Adler AB, Hoge CW, Castro CA. Stigma and  
24 barriers to care in soldiers postcombat. *Psychological Services*. 2009;6(2):108.  
25  
26 29. Gorgievski M, Peeters P, Rietzschel E, Bipp T. Betrouwbaarheid en Validiteit van de  
27 Nederlandse vertaling van de Work Design Questionnaire. *Gedrag en Organisatie*.  
28 2016;29(3):273-301.  
29  
30 30. Kim PY, Thomas JL, Wilk JE, Castro CA, Hoge CW. Stigma, barriers to care, and  
31 use of mental health services among active duty and National Guard soldiers after combat.  
32 *Psychiatric Services*. 2010;61(6):582-8.  
33  
34 31. Coleman S, Stevelink S, Hatch S, Denny J, Greenberg N. Stigma-related barriers and  
35 facilitators to help seeking for mental health issues in the armed forces: a systematic review  
36 and thematic synthesis of qualitative literature. *Psychological Medicine*. 2017;47(11):1880-  
37 92.  
38  
39 32. van Hees SG, Carlier BE, Vossen E, Blonk RW, Oomens S. Towards a better  
40 understanding of work participation among employees with common mental health problems:  
41 a systematic realist review. *Scandinavian Journal of Work, Environment & Health*.  
42  
43 33. van Beukering IE, Bakker M, Corrigan PW, Gürbüz S, Bogaers RI, Janssens KME, et  
44 al. Expectations of Mental Illness Disclosure Outcomes in the Work Context: A Cross-  
45 Sectional Study Among Dutch Workers. *Journal of Occupational Rehabilitation*. 2022.  
46  
47 34. Stuart H. Mental Illness Stigma Expressed by Police to Police. *The Israel journal of*  
48 *psychiatry and related sciences*. 2017;54(1):18-23.  
49  
50 35. Gould M, Greenberg N, Hetherington J. Stigma and the military: evaluation of a PTSD  
51 psychoeducational program. *Journal of Traumatic Stress: Official Publication of The*  
52 *International Society for Traumatic Stress Studies*. 2007;20(4):505-15.  
53  
54 36. Cook JA, Copeland ME, Floyd CB, Jonikas JA, Hamilton MM, Razzano L, et al. A  
55 randomized controlled trial of effects of Wellness Recovery Action Planning on depression,  
56 anxiety, and recovery. *Psychiatric Services*. 2012;63(6):541-7.  
57  
58 37. Henderson C, Brohan E, Clement S, Williams P, Lassman F, Schauman O, et al.  
59 Decision aid on disclosure of mental health status to an employer: feasibility and outcomes of  
60 a randomised controlled trial. *The British Journal of Psychiatry*. 2013;203(5):350-7.  
38. Rüsçh N, Kösters M. Honest, Open, Proud to support disclosure decisions and to  
decrease stigma's impact among people with mental illness: Conceptual review and meta-  
analysis of program efficacy. *Social Psychiatry and Psychiatric Epidemiology*. 2021:1-14.  
39. Scior K, Rüsçh N, White C, Corrigan PW. Supporting mental health disclosure  
decisions: the Honest, Open, Proud programme. *The British Journal of Psychiatry*.  
2020;216(5):243-5.



- 1  
2  
3 40. Stratton E, Choi I, Hickie I, Henderson C, Harvey SB, Glozier N. Web-based decision  
4 aid tool for disclosure of a mental health condition in the workplace: a randomised controlled  
5 trial. *Occupational and Environmental Medicine*. 2019;76(9):595-602.  
6  
7 41. Bertilsson M, Klinkhammer S, Staland-Nyman C, de Rijk A. How Managers Find  
8 Out About Common Mental Disorders Among Their Employees. *Journal of Occupational  
9 and Environmental Medicine*. 2021;63(11):975-84.  
10  
11 42. Gayed A, Milligan-Saville JS, Nicholas J, Bryan BT, LaMontagne AD, Milner A, et  
12 al. Effectiveness of training workplace managers to understand and support the mental health  
13 needs of employees: a systematic review and meta-analysis. *Occup Environ Med*.  
14 2018;75(6):462-70.  
15  
16  
17  
18  
19  
20  
21  
22  
23  
24  
25  
26  
27  
28  
29  
30  
31  
32  
33  
34  
35  
36  
37  
38  
39  
40  
41  
42  
43  
44  
45  
46  
47  
48  
49  
50  
51  
52  
53  
54  
55  
56  
57  
58  
59  
60

1  
2  
3  
4  
5  
6  
7  
8  
9  
10  
11  
12  
13  
14  
15  
16  
17  
18  
19  
20  
21  
22  
23  
24  
25  
26  
27  
28  
29  
30  
31  
32  
33  
34  
35  
36  
37  
38  
39  
40  
41  
42  
43  
44  
45  
46  
47  
48  
49  
50  
51  
52  
53  
54  
55  
56  
57  
58  
59  
60

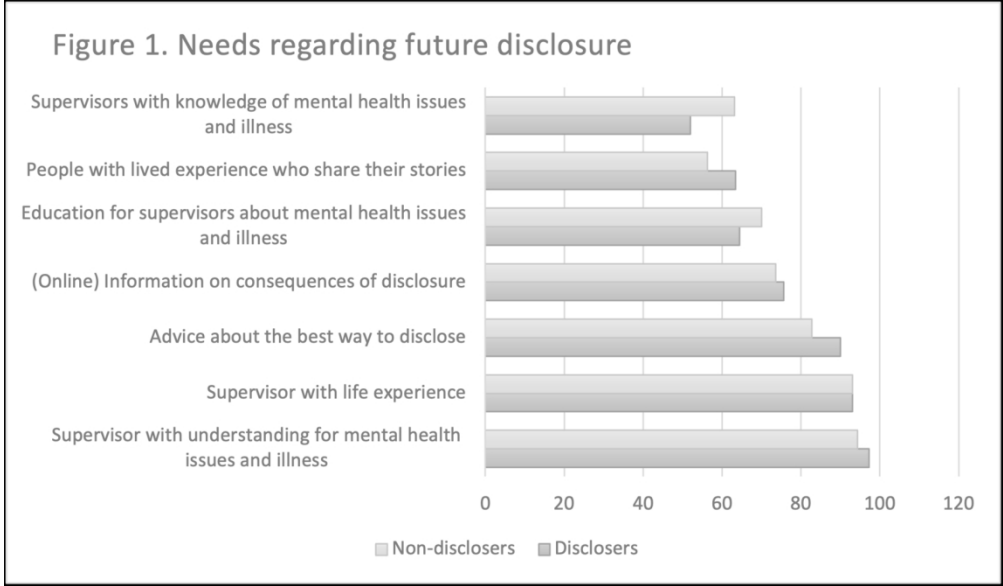

Needs regarding future disclosure

153x89mm (300 x 300 DPI)

## Appendix

### Appendix A. Measures used to assess current mental health issues and illness.

| Scale                                             | Information                                                                                                                                                                                                  | Psychometric properties based on earlier studies                                                                                                                                                                                                             | Reliability in current study                            | Cut-off score used                                                                                                                | References  |
|---------------------------------------------------|--------------------------------------------------------------------------------------------------------------------------------------------------------------------------------------------------------------|--------------------------------------------------------------------------------------------------------------------------------------------------------------------------------------------------------------------------------------------------------------|---------------------------------------------------------|-----------------------------------------------------------------------------------------------------------------------------------|-------------|
| The hospital anxiety and depression scale (HADS). | A 14-item scale measuring anxiety and depression.                                                                                                                                                            | Based on a literature review, reliability of the anxiety scale of the HADS varies from .68 to .93 and the depression scale varies from .67 to .90. Sensitivity and specificity for both anxiety and depression was approximately .80.                        | Depression:<br>$\alpha=.85$<br>Anxiety:<br>$\alpha=.84$ | A cut-off score of > 8 was used for depression and anxiety, as recommended by earlier research.                                   | (16, 36-38) |
| PTSD checklist for the DSM-5 (PCL-5)              | 20-item scale measuring PTSD symptoms. Participants received a question screening whether they had experienced extremely stressful events (examples were provided), and if yes, they received the PCL-5.     | The PCL-5 has strong reliability ( $\alpha = .94$ ) and convergent ( $r_s = .74$ to $.85$ ) and discriminant ( $r_s = .31$ to $.60$ ) validity. Sensitivity is approximately .77 and specificity .96.                                                        | $\alpha = .94$                                          | A cut-off of >33 was used as an indication of PTSD, following the guidelines.                                                     | (19, 39)    |
| ASSIST-LITE                                       | Measure to assess a wide range of substance use. This questionnaire consists of 6 items, one per substance, and 2-3 follow up questions in case a substance is used by the participant in the past 3 months. | Sensitivity for each substance was between .8 and 1.0, and specificity between .7 and .8. Reliability is N.A. as all questions are about different substances.                                                                                               | N/A as all questions are about different substances.    | A cut-off of $\geq 2$ was used for all substances except for alcohol, where the cut-off was $\geq 3$ , following the user manual. | (17)        |
| AUDIT-C                                           | A 3-item scale, to assess alcohol use.                                                                                                                                                                       | The AUDIT-C has been validated and shown to have good internal consistency in a variety of different samples. In a previous study among military personnel, the reliability was .77. Specificity is between .89 and .91 and sensitivity between .73 and .86. | $\alpha=.64$                                            | A cut-off of $\geq 8$ was used, as recommended for military population.                                                           | (18, 40)    |

1  
2  
3 **Appendix B. Mental health issues and illness (MHI) scores.**  
4

5  
6  
7  
8  
9  
10  
11  
12  
13  
14  
15  
16  
17  
18  
19  
20  
21  
22  
23  
24  
25  
26  
27  
28  
29  
30  
31  
32  
33  
34  
35  
36  
37  
38  
39  
40  
41  
42  
43  
44  
45  
46  
47  
48  
49  
50  
51  
52  
53  
54  
55  
56  
57  
58  
59  
60

|                                                                 | Military personnel who indicated having (had) MHI |      | Military personnel who indicated not having had MHI |      |
|-----------------------------------------------------------------|---------------------------------------------------|------|-----------------------------------------------------|------|
|                                                                 | N                                                 | %    | N                                                   | %    |
|                                                                 | 324                                               | 37.0 | 554                                                 | 63.1 |
| <b>Type of MHI as reported by military personnel themselves</b> |                                                   |      |                                                     |      |
| Anxiety (incl. obsessive compulsive disorder)                   | 111                                               | 34.3 | N/A                                                 | N/A  |
| Depression (incl. manic and bipolar)                            | 146                                               | 45.1 | N/A                                                 | N/A  |
| Burn-out                                                        | 176                                               | 54.3 | N/A                                                 | N/A  |
| Stress                                                          | 260                                               | 80.3 | N/A                                                 | N/A  |
| Exhaustion                                                      | 205                                               | 63.3 | N/A                                                 | N/A  |
| Post traumatic stress disorder                                  | 55                                                | 17.0 | N/A                                                 | N/A  |
| Psychotic disorders                                             | 3                                                 | .9   | N/A                                                 | N/A  |
| Personality disorder                                            | 77                                                | 23.8 | N/A                                                 | N/A  |
| Autism                                                          | 16                                                | 5.0  | N/A                                                 | N/A  |
| Attention deficit hyperactivity disorder                        | 34                                                | 10.5 | N/A                                                 | N/A  |
| Eating disorder                                                 | 10                                                | 3.1  | N/A                                                 | N/A  |
| Substance use disorder                                          | 56                                                | 17.3 | N/A                                                 | N/A  |
| <b>Current type of MHI based on measures of mental health</b>   |                                                   |      |                                                     |      |
| HADS depression                                                 | 59                                                | 18.2 | 18                                                  | 3.3  |
| HADS anxiety                                                    | 65                                                | 20.1 | 14                                                  | 2.5  |
| Assist lite tobacco                                             | 48                                                | 14.8 | 79                                                  | 14.3 |
| Assist lite alcohol                                             | 50                                                | 15.4 | 38                                                  | 6.9  |
| Assist lite cannabis                                            | 1                                                 | .3   | 3                                                   | .5   |
| Assist lite amphetamine                                         | 2                                                 | .6   | 0                                                   | 0.0  |
| Assist lite sleepmedication                                     | 8                                                 | 2.5  | 2                                                   | .4   |
| Assist lite streetdrug                                          | 0                                                 | 0.0  | 0                                                   | 0.0  |
| Audit C                                                         | 13                                                | 4.0  | 19                                                  | 3.4  |
| PCL-5 score                                                     | 19                                                | 5.9  | 2                                                   | .4   |

**STROBE 2007 (v4) Statement—Checklist of items that should be included in reports of *cross-sectional studies***

| Section/Topic                | Item # | Recommendation                                                                                                                                                                       | Reported on page # |
|------------------------------|--------|--------------------------------------------------------------------------------------------------------------------------------------------------------------------------------------|--------------------|
| <b>Title and abstract</b>    | 1      | (a) Indicate the study's design with a commonly used term in the title or the abstract                                                                                               | 1-2                |
|                              |        | (b) Provide in the abstract an informative and balanced summary of what was done and what was found                                                                                  | 2-3                |
| <b>Introduction</b>          |        |                                                                                                                                                                                      |                    |
| Background/rationale         | 2      | Explain the scientific background and rationale for the investigation being reported                                                                                                 | 4-5                |
| Objectives                   | 3      | State specific objectives, including any prespecified hypotheses                                                                                                                     | 5                  |
| <b>Methods</b>               |        |                                                                                                                                                                                      |                    |
| Study design                 | 4      | Present key elements of study design early in the paper                                                                                                                              | 6                  |
| Setting                      | 5      | Describe the setting, locations, and relevant dates, including periods of recruitment, exposure, follow-up, and data collection                                                      | 6-7                |
| Participants                 | 6      | (a) Give the eligibility criteria, and the sources and methods of selection of participants                                                                                          | 6-7                |
| Variables                    | 7      | Clearly define all outcomes, exposures, predictors, potential confounders, and effect modifiers. Give diagnostic criteria, if applicable                                             | 7-10               |
| Data sources/<br>measurement | 8*     | For each variable of interest, give sources of data and details of methods of assessment (measurement). Describe comparability of assessment methods if there is more than one group | 7-9                |
| Bias                         | 9      | Describe any efforts to address potential sources of bias                                                                                                                            | 18                 |
| Study size                   | 10     | Explain how the study size was arrived at                                                                                                                                            | 6-7, 11            |
| Quantitative variables       | 11     | Explain how quantitative variables were handled in the analyses. If applicable, describe which groupings were chosen and why                                                         | 9-10               |
| Statistical methods          | 12     | (a) Describe all statistical methods, including those used to control for confounding                                                                                                | 9-10               |
|                              |        | (b) Describe any methods used to examine subgroups and interactions                                                                                                                  | 9-10               |
|                              |        | (c) Explain how missing data were addressed                                                                                                                                          | 10                 |
|                              |        | (d) If applicable, describe analytical methods taking account of sampling strategy                                                                                                   | N/A                |
|                              |        | (e) Describe any sensitivity analyses                                                                                                                                                | N/A                |

|                          |     |                                                                                                                                                                                                              |         |
|--------------------------|-----|--------------------------------------------------------------------------------------------------------------------------------------------------------------------------------------------------------------|---------|
| <b>Results</b>           |     |                                                                                                                                                                                                              |         |
| Participants             | 13* | (a) Report numbers of individuals at each stage of study—eg numbers potentially eligible, examined for eligibility, confirmed eligible, included in the study, completing follow-up, and analysed            | 11      |
|                          |     | (b) Give reasons for non-participation at each stage                                                                                                                                                         | 11      |
|                          |     | (c) Consider use of a flow diagram                                                                                                                                                                           | N/A     |
| Descriptive data         | 14* | (a) Give characteristics of study participants (eg demographic, clinical, social) and information on exposures and potential confounders                                                                     | 11-12   |
|                          |     | (b) Indicate number of participants with missing data for each variable of interest                                                                                                                          | 10-11   |
| Outcome data             | 15* | Report numbers of outcome events or summary measures                                                                                                                                                         | 11      |
| Main results             | 16  | (a) Give unadjusted estimates and, if applicable, confounder-adjusted estimates and their precision (eg, 95% confidence interval). Make clear which confounders were adjusted for and why they were included | 12 - 14 |
|                          |     | (b) Report category boundaries when continuous variables were categorized                                                                                                                                    | 9-10    |
|                          |     | (c) If relevant, consider translating estimates of relative risk into absolute risk for a meaningful time period                                                                                             | N/A     |
| Other analyses           | 17  | Report other analyses done—eg analyses of subgroups and interactions, and sensitivity analyses                                                                                                               | 9-10    |
| <b>Discussion</b>        |     |                                                                                                                                                                                                              |         |
| Key results              | 18  | Summarise key results with reference to study objectives                                                                                                                                                     | 13      |
| Limitations              | 19  | Discuss limitations of the study, taking into account sources of potential bias or imprecision. Discuss both direction and magnitude of any potential bias                                                   | 17-18   |
| Interpretation           | 20  | Give a cautious overall interpretation of results considering objectives, limitations, multiplicity of analyses, results from similar studies, and other relevant evidence                                   | 15-19   |
| Generalisability         | 21  | Discuss the generalisability (external validity) of the study results                                                                                                                                        | 18      |
| <b>Other information</b> |     |                                                                                                                                                                                                              |         |
| Funding                  | 22  | Give the source of funding and the role of the funders for the present study and, if applicable, for the original study on which the present article is based                                                | 24      |

\*Give information separately for cases and controls in case-control studies and, if applicable, for exposed and unexposed groups in cohort and cross-sectional studies.

**Note:** An Explanation and Elaboration article discusses each checklist item and gives methodological background and published examples of transparent reporting. The STROBE checklist is best used in conjunction with this article (freely available on the Web sites of PLoS Medicine at <http://www.plosmedicine.org/>, Annals of Internal Medicine at <http://www.annals.org/>, and Epidemiology at <http://www.epidem.com/>). Information on the STROBE Initiative is available at [www.strobe-statement.org](http://www.strobe-statement.org).

# BMJ Open

## Mental health issues and illness and substance use disorder (non-)disclosure to a supervisor: A cross-sectional study on beliefs, attitudes and needs of military personnel.

|                                 |                                                                                                                                                                                                                                                                                                                                                                                                                                                                                                                                                                                                                                                                                                                                                                                                                                                                                                                                                                                                                                                                                                                 |
|---------------------------------|-----------------------------------------------------------------------------------------------------------------------------------------------------------------------------------------------------------------------------------------------------------------------------------------------------------------------------------------------------------------------------------------------------------------------------------------------------------------------------------------------------------------------------------------------------------------------------------------------------------------------------------------------------------------------------------------------------------------------------------------------------------------------------------------------------------------------------------------------------------------------------------------------------------------------------------------------------------------------------------------------------------------------------------------------------------------------------------------------------------------|
| Journal:                        | <i>BMJ Open</i>                                                                                                                                                                                                                                                                                                                                                                                                                                                                                                                                                                                                                                                                                                                                                                                                                                                                                                                                                                                                                                                                                                 |
| Manuscript ID                   | bmjopen-2022-063125.R2                                                                                                                                                                                                                                                                                                                                                                                                                                                                                                                                                                                                                                                                                                                                                                                                                                                                                                                                                                                                                                                                                          |
| Article Type:                   | Original research                                                                                                                                                                                                                                                                                                                                                                                                                                                                                                                                                                                                                                                                                                                                                                                                                                                                                                                                                                                                                                                                                               |
| Date Submitted by the Author:   | 30-Jan-2023                                                                                                                                                                                                                                                                                                                                                                                                                                                                                                                                                                                                                                                                                                                                                                                                                                                                                                                                                                                                                                                                                                     |
| Complete List of Authors:       | Bogaers, Rebecca; Tilburg University Tilburg School of Social and Behavioral Sciences, Tranzo, Scientific Center for Care and Wellbeing; Brain Research and Innovation Centre<br>Geuze, Elbert; Brain Research and Innovation Centre; Brain Center Rudolf Magnus, University Medical Center Utrecht, Department of Psychiatry<br>van Weeghel, Jaap; Tilburg University Tilburg School of Social and Behavioral Sciences, Tranzo, Scientific Center for Care and Wellbeing<br>Leijten, Fenna; Netherlands Ministry of Defence, Directorate-General of Policy, Directorate of Strategy and Knowledge<br>van de Mheen, D; Tilburg University Tilburg School of Social and Behavioral Sciences, Tranzo, Scientific Center for Care and Wellbeing<br>Greenberg, N; King's College London, King's Centre for Military Health Research<br>Rozema, A; Tilburg University Tilburg School of Social and Behavioral Sciences, Tranzo, Scientific Center for Care and Wellbeing<br>Brouwers, Evelien; Tilburg University Tilburg School of Social and Behavioral Sciences, Tranzo, Scientific Center for Care and Wellbeing |
| <b>Primary Subject Heading</b>: | Occupational and environmental medicine                                                                                                                                                                                                                                                                                                                                                                                                                                                                                                                                                                                                                                                                                                                                                                                                                                                                                                                                                                                                                                                                         |
| Secondary Subject Heading:      | Mental health, Occupational and environmental medicine, Addiction                                                                                                                                                                                                                                                                                                                                                                                                                                                                                                                                                                                                                                                                                                                                                                                                                                                                                                                                                                                                                                               |
| Keywords:                       | MENTAL HEALTH, OCCUPATIONAL & INDUSTRIAL MEDICINE, PREVENTIVE MEDICINE, Substance misuse < PSYCHIATRY, PSYCHIATRY                                                                                                                                                                                                                                                                                                                                                                                                                                                                                                                                                                                                                                                                                                                                                                                                                                                                                                                                                                                               |
|                                 |                                                                                                                                                                                                                                                                                                                                                                                                                                                                                                                                                                                                                                                                                                                                                                                                                                                                                                                                                                                                                                                                                                                 |

SCHOLARONE™  
Manuscripts



I, the Submitting Author has the right to grant and does grant on behalf of all authors of the Work (as defined in the below author licence), an exclusive licence and/or a non-exclusive licence for contributions from authors who are: i) UK Crown employees; ii) where BMJ has agreed a CC-BY licence shall apply, and/or iii) in accordance with the terms applicable for US Federal Government officers or employees acting as part of their official duties; on a worldwide, perpetual, irrevocable, royalty-free basis to BMJ Publishing Group Ltd ("BMJ") its licensees and where the relevant Journal is co-owned by BMJ to the co-owners of the Journal, to publish the Work in this journal and any other BMJ products and to exploit all rights, as set out in our [licence](#).

The Submitting Author accepts and understands that any supply made under these terms is made by BMJ to the Submitting Author unless you are acting as an employee on behalf of your employer or a postgraduate student of an affiliated institution which is paying any applicable article publishing charge ("APC") for Open Access articles. Where the Submitting Author wishes to make the Work available on an Open Access basis (and intends to pay the relevant APC), the terms of reuse of such Open Access shall be governed by a Creative Commons licence – details of these licences and which [Creative Commons](#) licence will apply to this Work are set out in our licence referred to above.

Other than as permitted in any relevant BMJ Author's Self Archiving Policies, I confirm this Work has not been accepted for publication elsewhere, is not being considered for publication elsewhere and does not duplicate material already published. I confirm all authors consent to publication of this Work and authorise the granting of this licence.



1  
2  
3 1 **Mental health issues and illness and substance use disorder (non-)disclosure to a**  
4  
5 2 **supervisor: A cross-sectional study on beliefs, attitudes and needs of military personnel.**  
6  
7  
8 3

9  
10 4 Rebecca Bogaers<sup>\*a,b</sup>, Elbert Geuze<sup>b,c</sup>, Jaap van Weeghel<sup>a</sup>, Fenna Leijten<sup>d</sup>, Dike van de  
11  
12 5 Mheen<sup>a</sup>, Neil Greenberg<sup>e</sup>, Andrea Rozema<sup>a</sup>, Evelien Brouwers<sup>a</sup>.  
13  
14 6

15  
16  
17 7 <sup>a</sup>Tranzo, Scientific Center for Care and Wellbeing, Tilburg School of Social and Behavioral  
18 8 Sciences, Tilburg University, the Netherlands.; <sup>b</sup>Brain Research and Innovation Centre,  
19 9 Ministry of Defence, the Netherlands.; <sup>c</sup> Brain Center Rudolf Magnus, Department of  
20 10 Psychiatry, University Medical Center Utrecht, the Netherlands.; <sup>d</sup> Directorate of Strategy and  
21 11 Knowledge, Directorate-General of Policy, Ministry of Defence, the Netherlands.; <sup>d</sup> King's  
22 12 Centre for Military Health Research, King's College, United Kingdom.  
23 13

24  
25  
26 14 \*Corresponding author: r.i.bogaers@tilburguniversity.edu  
27  
28 15  
29  
30 16  
31  
32 17  
33  
34 18  
35  
36 19  
37  
38 20  
39  
40 21  
41  
42 22  
43  
44 23  
45  
46 24  
47  
48 25  
49  
50 26  
51  
52 27  
53  
54 28  
55  
56 29  
57  
58 30  
59  
60

20 **Word count: 4157**

21 **Abstract count: 299**

22 **References: 44**

27 **Keywords:** Disclosure, Mental health issues and illness, Sustainable employment, Military,  
28 Stigma

## 29 Abstract

30 **Objectives.** Research suggests that military personnel frequently delay disclosing mental  
31 health issues and illness (MHI), including substance use disorder, to supervisors. This delay  
32 causes missed opportunities for support and workplace accommodations which may help to  
33 avoid adverse occupational outcomes. The current study aims to examine disclosure related  
34 beliefs, attitudes, and needs, to create better understanding of personnel's disclosure decision-  
35 making. **Design.** A cross-sectional questionnaire study among military personnel with and  
36 without MHI. Beliefs, attitudes, and needs regarding the (non-)disclosure decision to a  
37 supervisor were examined, including factors associated with (non-)disclosure intentions and  
38 decisions. Descriptive and regression (logistic and ordinal) analyses were performed. **Setting.**  
39 The study took place within the Dutch military. **Participants.** Military personnel with MHI  
40 (N=324) and without MHI (N=554) participated in this study. **Outcome measure.** (Non-  
41 )disclosure intentions and decisions. **Results.** Common beliefs and attitudes *pro non-*  
42 *disclosure* were the preference to solve one's own problems (68.3%), the preference for  
43 privacy (58.9%), and a variety of stigma related concerns. Common beliefs and attitudes *pro*  
44 *disclosure* were that personnel wanted to perform well at work (93.3%) and the desire to act  
45 responsibly towards work colleagues (84.5%). The most reported need for future disclosure  
46 (96.8%) was having a supervisor who shows understanding for MHI. The following factors  
47 were associated both with non-disclosure intentions and decisions: higher preference for  
48 privacy (OR(95%CI) = 1.99(1.50–2.65)<sub>intention</sub>, 2.05(1.12–3.76)<sub>decision</sub>) and self-management  
49 (OR(95%CI) = 1.64(1.20–2.23)<sub>intention</sub>, 1.79(1.00–3.20)<sub>decision</sub>), higher stigma related concerns  
50 (OR(95%CI) = 1.76(1.12–2.77)<sub>intention</sub>, 2.21(1.02–4.79)<sub>decision</sub>), and lower quality of  
51 supervisor-employee relationship (OR(95%CI) = .25(.15–.42)<sub>intention</sub>, .47(.25–.87)<sub>decision</sub>).  
52 **Conclusion.** To facilitate (early-)disclosure to a supervisor, creating opportunities for  
53 workplace support, interventions should focus on decreasing stigma and discrimination and

1  
2  
3 54 align with personnel's preference for self-management. Furthermore, training is needed for  
4  
5 55 supervisors on how to recognize, and effectively communicate with, personnel with MHI.  
6  
7  
8 56 Focus should also be on improving supervisor-employee relationships.  
9  
10  
11  
12

## 13 58 **Strengths and Limitations**

- 14 59 • Disclosure of mental health issues and illness to a supervisor was examined in the  
15  
16 60 military, a context in which little research has been done on this topic.
- 17  
18 61 • This study included a group that is usually hard to study, namely military personnel  
19  
20 62 who have not disclosed.
- 21  
22 63 • This study included both personnel with and without mental health issues and illness,  
23  
24 64 providing insights for interventions for personnel who may develop mental health  
25  
26 65 issues and illness in the future.
- 27  
28 66 • The sample is not representative for the entire military, due to the sampling method.
- 29  
30 67 • Due to the cross-sectional design of the study, no causality can be presumed.  
31  
32  
33  
34  
35  
36  
37  
38  
39  
40  
41  
42  
43  
44  
45  
46  
47  
48  
49  
50  
51  
52  
53  
54  
55  
56  
57  
58  
59  
60

## 79 **Introduction**

80           The decision for workers whether to disclose their mental health issues and illness  
81 (MHI), including substance use disorder, to their supervisors can have far-reaching  
82 consequences for their sustainable employment (1-4). Disclosure can lead to workplace  
83 support and accommodations, which can prevent worsened symptoms and sick-leave, and  
84 non-disclosure can lead to missed opportunities for this support (2, 3, 5). However, disclosure  
85 can also lead to being stigmatized and discriminated against (6, 7).

86           The disclosure dilemma is expected to be even more prominent for trauma-prone  
87 occupations, such as the military, where workers are expected to be ‘strong’ and disclosure  
88 may yield less positive outcomes (5, 8). Additionally, workers in these high-risk occupations  
89 are exposed to stressors at work, increasing their risk of developing MHI (9). Previous  
90 research in the military showed that there is a high preference for solving one’s own  
91 problems (10), there are stigma related concerns and military personnel tend to delay seeking  
92 help (6, 11, 12). Together this might cause a delay in disclosure to a supervisor. To facilitate  
93 (early-)disclosure, so that personnel can receive support which can prevent adverse  
94 occupational outcomes (2, 3, 5), more insight is needed into the (non-)disclosure decision.

95           Although the (non-)disclosure decision is complex and has far-reaching  
96 consequences, research on this matter is scarce and mostly qualitative, especially in the  
97 military (3, 6, 11, 13). Research has shown that the supervisor plays an important role, where  
98 supervisor attitude and behavior can form both a barrier as well as be a facilitator for  
99 disclosure (6, 14, 15). Furthermore, “The model of employee decision-making about  
100 disclosure of a mental disorder at work” proposes that there is a default position of non-  
101 disclosure, caused by fear of stigma, wanting to maintain boundaries, and maintaining  
102 confidentiality (16). This model proposes that a triggering incident is needed before a  
103 disclosure decision is made (16).

1  
2  
3 104 The aim of the current study was to gain insight into the (non-)disclosure decision to a  
4  
5 105 supervisor in the military, and to confirm and expand earlier qualitative findings (6). This was  
6  
7 106 done by examining beliefs, attitudes and needs related to disclosure to a supervisor. Based on  
8  
9  
10 107 earlier qualitative research on disclosure in the military (6, 11), studies on disclosure among  
11  
12 108 Dutch workers (17, 18), and literature reviews on disclosure (2, 19), it was hypothesized that  
13  
14 109 the following beliefs and attitudes *pro non-disclosure* would be important for, and associated  
15  
16 110 with, the disclosure decision: stigma related concerns (e.g. social rejection), preference for  
17  
18 111 self-management and privacy, negative attitudes of the supervisor towards MHI, and  
19  
20 112 difficulty talking about MHI. Additionally, the following beliefs and attitudes *pro disclosure*  
21  
22 113 were hypothesized to be important for the disclosure decision: wanting to be one's true and  
23  
24 114 authentic self, positive attitudes of the supervisor towards MHI, setting an example,  
25  
26 115 organizational policies, a need for work accommodations, feelings of responsibility, whether  
27  
28 116 MHI affects work functioning, advice from others, and not having a choice due to the  
29  
30 117 visibility of symptoms, having to report sick or needing treatment during work. To inform  
31  
32 118 future interventions, several needs related to disclosure were also assessed, based on earlier  
33  
34 119 qualitative research (6). These needs were related to information on how to disclose and  
35  
36 120 education for supervisors on how to support military personnel with MHI. As  
37  
38 121 personnel with and without MHI have shown to have different views on treatment seeking  
39  
40 122 (10, 12), the current study examined both actual disclosure decisions in personnel with MHI  
41  
42 123 as well as future disclosure intentions for those without MHI. The research questions were:  
43  
44 124 (1) 'What are beliefs, attitudes, and needs of military personnel regarding disclosure to a  
45  
46 125 supervisor?', (2) 'Do disclosers, differ from non-disclosers, and if so, how?', and (3) 'What  
47  
48 126 factors are associated with non-disclosure to a supervisor?'.  
49  
50  
51  
52  
53  
54  
55  
56  
57  
58  
59  
60

## 129 **Method**

### 130 **Design**

131 A cross-sectional observational design with an online questionnaire. Comparisons  
132 were made based on past disclosure decisions for personnel with MHI and on disclosure  
133 intentions for those without MHI. Data collection happened simultaneously with a study  
134 on treatment seeking for MHI (12). The strobe-checklist was used to report this study (20).

135

### 136 **Setting**

137 This study took place within the Dutch military, where healthcare is organized  
138 internally. There are sanctions for use of soft and hard drugs. However, when substance use  
139 disorder is reported to a mental health professional, there are confidentiality agreements (10).

140

### 141 **Patient and public involvement**

142 Different stakeholders from the Dutch military (psychologists, psychiatrists,  
143 policymakers and military personnel) were involved in the development of the questionnaire.  
144 They provided advise on the language used in the questionnaire to ensure that it was military  
145 appropriate language. They also provided advise on the best way to recruit participants.

146

### 147 **Participant recruitment**

148 Active-duty military personnel who have been on deployment in the past 5 years were  
149 recruited. To ensure that both personnel with and without MHI would be present in the  
150 sample, existing data from a questionnaire personnel receive after deployment was used to  
151 select a sample. This questionnaire included scores of depression, aggression, alcohol use and  
152 PTSD. Clinical cut-off scores were used to identify personnel with and without an indication  
153 of MHI. Next, a stratified sample, based on gender, age, military division and rank of

1  
2  
3 154 personnel was approached, half with indication of MHI (N=1000) and half without  
4  
5 155 (N=1000).

6  
7 156 Data were collected between January and February 2021. All personnel were invited  
8  
9  
10 157 at the same time, both by e-mail and a letter. Reminders were sent after 3 and 5 weeks. It was  
11  
12 158 made clear that the responses to the questionnaire would be anonymous.

13  
14  
15 159

## 16 160 **Measures**

### 17 161 *Demographics*

18  
19  
20 162 Gender, age, marital status, education-level, type of work (operational or not),  
21  
22 163 military department, rank, and years of service were assessed.

### 23 164 *Mental health issues and illness*

24  
25 165 **Current MHI.** To assess current MHI, the following measures were used;

26  
27 166 (a)Hospital anxiety and depression scale (21), (b)ASSIST-LITE for substance use disorder  
28  
29 167 (22), (c)AUDIT-C, for alcohol use (23), and (d)PTSD checklist for DSM-5 (24). For  
30  
31 168 psychometric properties and cut-off scores, see appendix A.

32  
33 169 **Self-reported MHI.** Personnel were asked whether they have (had) MHI. Group  
34  
35 170 membership (i.e., current/past MHI or no MHI) was determined based on this. If personnel  
36  
37 171 reported having (had) MHI, they received a list of 15 possible types of MHI (see appendix B)  
38  
39 172 and were asked to indicate whether it concerned current or past MHI, in line with earlier  
40  
41 173 research (12, 17, 25). They were asked whether the MHI was work-related (yes/no) and to  
42  
43 174 rate the severity of their symptoms (during the worst time) on a scale of 0 –10.

44  
45  
46 175

### 47 176 *(Non-)Disclosure intentions and decisions*

48  
49 177 Personnel with MHI were asked whether they had disclosed to their supervisor  
50  
51 178 (yes/no). Personnel without MHI were asked, in case they would develop MHI in the future,  
52  
53  
54  
55  
56  
57  
58  
59  
60

1  
2  
3 179 whether they would disclose this to their supervisor, using a 4-point scale ranging from very-  
4  
5 180 unlikely to very-likely.  
6

7  
8 181

9  
10 182 ***Beliefs, attitudes and needs***  
11

12 183 Based on earlier qualitative research on disclosure in the military (6, 11), studies on  
13  
14 184 disclosure among Dutch workers (17, 18), and literature reviews on disclosure (2, 3), it was  
15  
16 185 determined which beliefs and attitudes should be assessed. Regarding the beliefs and  
17  
18 186 attitudes, 13 statements *pro non-disclosure* (e.g. I would prefer to solve my own problems)  
19  
20 187 and 11 statements *pro disclosure* (e.g. In order to be your true self, disclosure is important)  
21  
22 188 were developed. Please see the results section for a full overview of the statements. Stigma  
23  
24 189 was found to be a main barrier to disclosure in our qualitative study (6). Therefore, several  
25  
26 190 stigma related statements were included. All the statements were assessed by several people  
27  
28 191 working in the military, to assure the questions were appropriate for the military context. The  
29  
30 192 statements were adjusted according to their feedback. Participants were asked to indicate on a  
31  
32 193 4-point scale to what extent they agreed with the statements, ranging from completely  
33  
34 194 disagree to completely agree.  
35  
36  
37  
38  
39

40 195 Personnel without MHI were asked additional questions about their needs regarding  
41  
42 196 disclosure if they would develop MHI in the future. Based on findings from the earlier  
43  
44 197 qualitative study (6), they were given seven options (e.g. a supervisor who shows  
45  
46 198 understanding for MHI) and were asked to rate these on a 4-point scale ranging from 'Not at  
47  
48 199 all' to 'Very much'. Please see the results section for a full overview of the assessed needs.  
49  
50

51 200

52  
53 201

54  
55 202

56  
57 203  
58  
59  
60



1  
2  
3 204 **(Previous) experience**  
4

5 205 **Familiarity.** Participants were asked about MHI in their surroundings using an  
6  
7 206 adaptation of the Level of Contact Report (26), following earlier research (25, 27). The total  
8  
9 score was used.  
10  
11

12 208 **Previous experience.** Participants were asked whether they had previous experience,  
13  
14 209 and/or seen experiences of others, with disclosure to a supervisor. If yes, they were asked  
15  
16 whether this experience was positive or negative.  
17  
18

19 211

20  
21 212 **Work context**  
22

23  
24 213 **Unit cohesion.** A three-item measure was used for perceived unit cohesion (28). For  
25  
26 214 example '*the members of my unit are cooperative with each other*'. Items were measured on a  
27  
28 215 5-point scale ranging from 'Completely-disagree' to 'Completely-agree'. Mean scores were  
29  
30 used. Participants with MHI were asked about unit cohesion at the time they experienced  
31  
32 MHI (28).  
33  
34

35 218 **Relationship supervisor.** A six-item measure for the relationship with the supervisor  
36  
37 219 from the Questionnaire on the Experience and Evaluation of Work (QEEW) was used. This  
38  
39 220 questionnaire is the most used and validated questionnaire for work experiences in the  
40  
41 221 Netherlands (29). Items were measured on a 4-point scale with answer categories 'Always',  
42  
43 222 'Often', 'Sometimes' and 'Never'. Mean scores were used, with higher scores indicating  
44  
45 223 better relationship quality. Participants with MHI were asked about the relationship at the  
46  
47 224 time they experienced MHI.  
48  
49

50  
51 225

52  
53 226 **Statistical analyses**  
54

55  
56 227 For beliefs, attitudes, and needs surrounding (non-)disclosure, descriptive analyses  
57  
58 228 were performed. Chi-square tests and Mann-Whitney U-tests were used for comparisons  
59  
60

229 between those who disclosed/intended to disclose and those who did not, as variables were  
230 not normally distributed.

231 To examine factors associated with (non-)disclosure, two separate analyses were  
232 performed. For personnel with MHI, a logistic regression was performed with non-disclosure  
233 decision as the dependent variable (0=disclosure, 1=non-disclosure). For personnel without  
234 MHI, an ordinal regression was performed, as disclosure intention had more than two  
235 categories. As the assumption of proportional odds was violated at first, the categories 'very  
236 unlikely' and 'unlikely' were merged, resulting in the dependent variable non-disclosure  
237 intention with categories 1=very-likely, 2=likely, and 3=(very)-unlikely. To prevent loss of  
238 information 'likely' and 'very-likely' were not combined. Fear of negative career  
239 consequences, social rejection, discrimination, self-stigma, shame, fear of receiving blame,  
240 fear of gossip and confidentiality concerns were combined into one (mean) measure of  
241 stigma, as they are all aspects of stigma (30). Together these items formed a reliable scale  
242 ( $\alpha_{\text{with MHI}}=.89$ ,  $\alpha_{\text{without MHI}}=.91$ ). There were no missing data, as forced response answers were  
243 used during data acquisition and a complete case analysis was used. All analyses were  
244 performed using SPSS.

### 246 **Ethical considerations**

247 Written informed consent was obtained from all subjects/patients. The authors assert  
248 that all procedures contributing to this work comply with the ethical standards of the relevant  
249 national and institutional committees on human experimentation and with the Helsinki  
250 Declaration of 1975, as revised in 2008. All procedures involving human subjects/patients  
251 were approved by the Tilburg School of Social and Behavioral Sciences Ethics Review  
252 Boards (approval number RP324) and the Dutch Military Ethics Review Board.

253  
254

## Results

### Participant characteristics

#### *Response rate*

After removing duplicates (caused by personnel going on multiple deployments) and personnel who had left active service from the original sample, a total of N=1627 eligible respondents were left. Of those, 63% (N=1025) started the questionnaire, and 54% (N=878) fully completed it and were used for further analysis. Compared to personnel who completed the questionnaire, those who did not complete it included more females ( $\chi^2(1, N=1008)=6.01, p=.014$ ), more lower and middle education level ( $\chi^2(2, N=1008)=7.25, p=.027$ ), and more non-commissioned officers ( $\chi^2(2, N=1006)=8.26, p=.016$ ). The majority quit while answering mental health questions.

#### *Non-disclosure (intentions)*

Of those with MHI (N=324), 24.4% indicated not having disclosed their MHI to their supervisor. Of those without MHI (N=554), 15.6% did not intend to disclose if they would develop MHI in the future.

#### *Sample characteristics*

Sample characteristics can be found in Table 1. For personnel with MHI, there was a significant association between marital status and non-disclosure decision ( $\chi^2(1, N=324)=5.53, p=.019$ ) with more people with a partner within the non-disclosers group. Those who had not disclosed, reported significantly lower symptom severity (M=6.01) compared to those who had disclosed (M=7.38,  $U=5885.5, Z=-5.37, p<.001$ ). For personnel without MHI, there were no significant differences in demographics based on non-disclosure

1  
2  
3 280 intentions. Information on reported MHI can be found in Appendix B.  
4

5 281 [INSERT TABLE 1]  
6  
7  
8 282

9  
10 283 **Beliefs, attitudes, and needs regarding (non-)disclosure to a supervisor**

11  
12 284 Regarding beliefs and attitudes *pro non-disclosure*, personnel preferred to solve their  
13  
14 285 own problems (73.8%with(w/)MHI, 65.2% (without(w/o)MHI)) and preferred privacy  
15  
16 286 (58.3%w/MHI, 59.3%w/oMHI). There were also high stigma related concerns, with  
17  
18 287 personnel reporting they saw (would see) themselves as weak due to MHI (52.5%w/MHI,  
19  
20 288 26.4%w/oMHI), had concerns about negative career consequences (35.5%w/MHI,  
21  
22 289 24.4%w/oMHI) and fear of social rejection (33.0%w/MHI, 20.6%w/oMHI). Only a minority  
23  
24 290 reported that their supervisor had negative attitudes towards MHI (9.3%w/MHI,  
25  
26 291 4.9%w/oMHI).  
27  
28  
29

30 292 As for beliefs and attitudes *pro disclosure*, the large majority indicated disclosure  
31  
32 293 would allow them to be their true and authentic self (95.7%w/MHI, 91.2%w/oMHI), and  
33  
34 294 believed disclosure was important due to the responsibility belonging to the nature of their  
35  
36 295 work (74.7%w/MHI, 90.3%w/oMHI). In addition, most reported that the military has good  
37  
38 296 policy for those who develop MHI (72.2%w/MHI, 87.9%w/oMHI) and that generally  
39  
40 297 supervisors take MHI seriously (82.4%w/MHI, 87.7%w/oMHI). Furthermore, personnel  
41  
42 298 reported that it matters for the disclosure decision whether MHI influences occupational  
43  
44 299 functioning (69.8%w/MHI, 74.7%w/oMHI) and whether work accommodations are needed  
45  
46 300 (43.5%w/MHI, 62.8%w/oMHI). Of those with MHI who had disclosed, the majority  
47  
48 301 indicated having had no choice, with 69% needing treatment during work hours and 46.9%  
49  
50 302 having to report sick. An overview of all beliefs and attitudes can be found in Supplementary  
51  
52 303 Table 1.  
53  
54  
55  
56  
57

58 304  
59  
60

1  
2  
3 305

4  
5 306 As for needs regarding future disclosure to a supervisor, the highest need was reported  
6  
7  
8 307 for supervisors who show understanding for MHI (96.8%) and have life experience (93.1%),  
9  
10 308 and advice about the best way to disclose (when/where/how) (88.8%). An overview of all  
11  
12 309 needs can be found in Figure 1.

13  
14  
15 310 [INSERT FIGURE 1]

16  
17 311

### 18 19 312 **Differences between disclosers and non-disclosers**

20  
21 313 Overall, those who did not (intend to) disclose, reported significantly higher  
22  
23 314 preference for solving own problems and for privacy, and lower feelings of responsibility due  
24  
25 315 to the nature of their work.

26  
27  
28 316 Within personnel with MHI, there was also a significant difference between non-  
29  
30 317 disclosers and disclosers in the following beliefs and attitudes *pro disclosure*: those who had  
31  
32 318 not disclosed reported MHI having less effect on their occupational functioning, and less  
33  
34 319 need for work accommodations compared to disclosers.

35  
36  
37 320 Within personnel without MHI, those who intended to disclose and those who did not,  
38  
39 321 differed significantly on all beliefs and attitudes *pro non-disclosure*. For beliefs and attitudes  
40  
41 322 *pro disclosure*, those with no intention to disclose indicated significantly lower belief that the  
42  
43 323 military has good policy for those with MHI, supervisors taking MHI less seriously, and a  
44  
45 324 lower desire to be a good example to others with MHI. Results with statistics can be found in  
46  
47 325 Supplementary Table 1. There were no significant differences in reported needs for future  
48  
49 326 disclosure, based on disclosure intention.

50  
51  
52 327

### 53 54 328 **Factors associated with non-disclosure to a supervisor**

1  
2  
3 329 For personnel with MHI, the logistic regression model with the dependent variable  
4  
5 330 non-disclosure, was statistically significant ( $\chi^2(24)=149.30, p<.001$ ) and explained 55.0%  
6  
7 331 (Nagelkerke $R^2$ ) of the variance in non-disclosure and correctly classified 85.% of cases. The  
8  
9 332 following background variables were significantly associated with non-disclosure: lower  
10  
11 333 symptom severity, having a partner, and lower employee-supervisor relationship quality.  
12  
13 334 Additionally, the following beliefs and attitudes *pro non-disclosure* were positively  
14  
15 335 associated with non-disclosure: preference for privacy, preference for self-management, and  
16  
17 336 stigma related concerns. Finally, the following beliefs and attitudes *pro disclosure* were  
18  
19 337 negatively associated with non-disclosure: importance given to disclosure advice from others,  
20  
21 338 MHI having impact on occupational functioning, and feelings of responsibility due to the  
22  
23 339 nature of work.

24  
25 340 For personnel without MHI, the ordinal logistic regression model with the dependent  
26  
27 341 variable non-disclosure intention, was statistically significant ( $\chi^2(23)=346.90, p<.001$ ) and  
28  
29 342 explained 53.5% (Nagelkerke $R^2$ ) of the variance in non-disclosure intention and correctly  
30  
31 343 classified 66.4% of cases. The following background variables were significantly associated  
32  
33 344 with non-disclosure intention: not having positive earlier experience with disclosing  
34  
35 345 something personal to a supervisor, having seen negative experiences of others with  
36  
37 346 disclosure, and lower employee-supervisor relationship quality. Additionally, the following  
38  
39 347 beliefs and attitudes *pro non-disclosure* were positively associated with non-disclosure  
40  
41 348 intentions: preference for privacy, preference for self-management, stigma related concerns  
42  
43 349 and finding it difficult to talk about MHI. Finally, the following beliefs and attitudes *pro*  
44  
45 350 *disclosure* were negatively associated with non-disclosure intentions: supervisor who takes  
46  
47 351 MHI seriously, needing work accommodations, wanting to be authentic self, and wanting to  
48  
49 352 be an example to others with MHI. All results with statistics can be found in Supplementary  
50  
51 353 Table 2.

1  
2  
3 354  
4  
5  
6 355  
7 356  
8 357

## Discussion

9 358

10 359 The current study aimed to examine beliefs, attitudes, and needs associated with (non-  
11  
12 360 )disclosure to a supervisor in the military. Non-disclosure was associated with higher stigma  
13  
14 361 related concerns, a higher preference for privacy and self-management, and a lower  
15  
16 362 supervisor-employee relationship. A quarter of personnel with MHI had not disclosed their  
17  
18 363 MHI to their supervisor, and those who had disclosed, appeared to do so after a considerable  
19  
20 364 delay. Important reasons for disclosure were that personnel wanted to be their true and  
21  
22 365 authentic self and thought disclosure was important due to the responsible nature of their  
23  
24 366 work. To consider disclosure, most personnel indicated they would need a supervisor who  
25  
26 367 shows understanding for MHI. Moreover, over 80% expressed a need for advice about the  
27  
28 368 best ways to disclose.  
29  
30  
31  
32

33 369 We identified that although the majority of personnel with MHI had disclosed to their  
34  
35 370 supervisor, they appeared to do so after a considerable delay. Those who disclosed had higher  
36  
37 371 symptom severity than non-disclosers and the majority disclosed because they had to call in  
38  
39 372 sick (46.9%) or had needed treatment during work hours (69.0%). This appears to be even  
40  
41 373 more so the case for military personnel, compared to civilians. A study on disclosure among  
42  
43 374 Dutch workers in general showed that 15.6% disclosed due to having to report sick, and  
44  
45 375 39.9% disclosed due to needing treatment during work (18). This is in line with ‘the model of  
46  
47 376 employee decision-making about disclosure of a mental disorder at work’, which proposes a  
48  
49 377 default position of non-disclosure and that a triggering incident is needed for disclosure – in  
50  
51 378 this case, having to call in sick or needing treatment (16). This late disclosure causes missed  
52  
53 379 opportunities for workplace support and work accommodations which can prevent worsened  
54  
55 380 symptoms and sick leave (1, 31, 32).  
56  
57  
58  
59  
60

1  
2  
3 381 Stigma related concerns form a barrier for (early-)disclosure. Half of those who had  
4  
5 382 not disclosed, saw themselves as weak for having MHI, experienced shame, and a third  
6  
7 383 feared gossip, negative career consequences, social rejection, and discrimination. These  
8  
9 384 stigma related concerns were significantly associated both with non-disclosure intentions and  
10  
11 385 decisions. Stigma has been found to be a barrier to disclosure before, both in military, other  
12  
13 386 trauma-prone occupations, and civilian populations (5, 6, 16, 33, 34). When comparing the  
14  
15 387 results of the current study to a study among Dutch civilian workers, it should be noted that  
16  
17 388 of military personnel who had not disclosed, half reported seeing themselves as weak and  
18  
19 389 being ashamed, compared to only 13.5% of civilians (18). Concerns about stigma thus appear  
20  
21 390 to be stronger within the military setting compared to civilian settings. These higher concerns  
22  
23 391 of stigma are likely caused by the military workplace culture and the responsible work nature,  
24  
25 392 where people are expected to be 'strong' (6, 8). It should be noted that the study among  
26  
27 393 civilians predominantly included females, while the current study predominantly included  
28  
29 394 males, which might also account for some of the differences (18). Future research into  
30  
31 395 destigmatizing interventions is needed, as up to now only a few, especially in the military,  
32  
33 396 rigorous destigmatizing intervention studies have been conducted (1). Trauma risk  
34  
35 397 management (TRiM) is a promising destigmatizing program within (military) organizational  
36  
37 398 settings, as it has shown to improve attitudes towards MHI (35). To facilitate disclosure,  
38  
39 399 stigma should also be targeted at a policy level, to take away some of the fears personnel face  
40  
41 400 (6).

42  
43 401 The preference for self-management also forms a barrier for (early-)disclosure.  
44  
45 402 Although disclosure rates are comparable to earlier research among Dutch workers in general  
46  
47 403 (17, 18), the reasons for non-disclosure differ. Of the non-disclosers, 87.3% reported a  
48  
49 404 preference for self-management, compared to 44.9% of civilians. This is likely also caused by  
50  
51 405 the military workplace culture, where people are expected to have a 'can-do' problem fixing  
52  
53  
54  
55  
56  
57  
58  
59  
60



1  
2  
3 406 mentality (6). To target this preference for self-management, self-help apps or personal  
4  
5 407 recovery programs could provide personnel the opportunity to manage their own MHI,  
6  
7 408 possibly giving them more confidence in disclosing and a feeling of control, as they are  
8  
9 409 already working on their MHI (36). This could also be done through easily accessible care  
10  
11 410 from for example a social worker. Additionally, decision aids and programs could be  
12  
13 411 implemented, as personnel indicated this as a need, and it can positively influence sustainable  
14  
15 412 employability and coping with stigma (37-40).

16  
17  
18  
19 413 To facilitate (early-)disclosure, there is an important role for the supervisor. The  
20  
21 414 results showed that lower employee-supervisor relationship quality was associated both with  
22  
23 415 non-disclosure decision and intention. Having seen negative experiences of others with  
24  
25 416 disclosure, was the second strongest predictor of non-disclosure intentions, indicating the  
26  
27 417 importance of how others, including supervisors, respond to disclosure. It is also important  
28  
29 418 that military personnel with positive experiences with disclosure, communicate openly about  
30  
31 419 these experiences. The previous qualitative study in the Dutch military (6), and a study  
32  
33 420 among Dutch workers in general (18), also showed the importance of supervisor relationships  
34  
35 421 and support (6). Supervisor attitudes towards MHI and knowledge of MHI have also been  
36  
37 422 found to be associated with whether employees disclose to the supervisor themselves, or that  
38  
39 423 the supervisor finds out some other way (41). Finally, supervisor support was not only found  
40  
41 424 to be important for disclosure, but also for treatment seeking for MHI, a decision which is  
42  
43 425 also of influence on sustainable employability (10). To facilitate (early-)disclosure, training  
44  
45 426 may be needed for supervisors to improve understanding and support of MHI needs (42).  
46  
47 427 Additionally, supervisor relationship quality could be addressed, for example by adjusting the  
48  
49 428 obligated job rotation every 3 years, giving personnel longer to build a relationship with their  
50  
51 429 supervisor.  
52  
53  
54  
55  
56  
57  
58  
59  
60

### 431 **Strengths and limitations**

432 The strengths of this study included the large sample and inclusion of a group that is  
433 usually hard to study (participants who have not disclosed). Additionally, the study included  
434 both personnel with and without MHI, providing insights for interventions for personnel who  
435 may develop MHI in the future. Finally, the study examined disclosure in the military where  
436 little research has been done on this topic.

437 As for limitations, the sample was not representative for the entire military, due to the  
438 sampling method. This method also caused the sample to include only personnel who have  
439 been on deployment. This group might have had more positive attitudes towards MHI and  
440 disclosure due to mental health training related to deployment (35).

441 Second, despite stratification, the current study included a sample of older, higher  
442 educated, and higher-ranking personnel. Comparisons showed that lower ranking and lower  
443 educated personnel were less likely to have completed the questionnaire once started.  
444 Majority of dropouts occurred during the mental health questions. Possibly these questions  
445 were hard to answer, or there were anonymity concerns. Additionally, drop-out might have  
446 been higher due to the use of forced response. The current study used a complete case  
447 analysis, which carries the assumption that data are missing completely at random (MCAR)  
448 (43). As the data appeared not to be missing completely at random, as described before, the  
449 results should be interpreted with caution, as they might be different for lower ranking and  
450 lower educated personnel. Previous research has shown that younger and lower educated  
451 workers disclosed less (18), so disclosure rates in the current study might be an  
452 overestimation of the true rates. Future research should further examine this in a  
453 representative sample.

454 Third, it should be noted that MHI in the current study includes substance use  
455 disorders. Previous research suggests that the stigma concerning substance use disorder is

1  
2  
3 456 higher compared to general mental health stigma (44), but no comparisons could be made in  
4  
5 457 the current study. Therefore, it is important that future research examines the decision to  
6  
7 458 disclose a substance use disorder separately from other MHI.  
8  
9

10 459 Also, due to the cross-sectional design of the study, no causality can be presumed.  
11  
12 460 Additionally, it should be noted that the questionnaire assessing attitudes, beliefs and needs  
13  
14 461 regarding disclosure, has not been validated. It was developed specifically for the current  
15  
16 462 study.  
17  
18

19 463

## 21 464 **Conclusion**

23  
24 465 To better facilitate (early-)disclosure of MHI to a supervisor, there is a need for  
25  
26 466 several changes within the military. First, destigmatizing interventions and policies are  
27  
28 467 needed to create a culture change where personnel do not feel shame for having MHI, and do  
29  
30 468 not have to fear that stigma and discrimination negatively affect their careers and wellbeing at  
31  
32 469 work. Second, offered early interventions should align with the preference for self-  
33  
34 470 management. Third, our results strongly suggest a need to train supervisors to recognize, and  
35  
36 471 effectively communicate with, personnel with MHI and to improve employee-supervisor  
37  
38 472 relationships. Together this could facilitate (early-)disclosure which may optimize  
39  
40 473 opportunities for the provision of workplace support and accommodations, which in turn can  
41  
42 474 increase the chance of recovery and sustainable employment.  
43  
44  
45  
46

47 475

48 476

49 477

50 478

51 479

52 480

53  
54  
55  
56  
57  
58  
59  
60

481

482

483

484

## Tables & Figures

**Table 1. Characteristics of the sample separated by military personnel with and without mental health issues or illness (MHI).**

|                                      | Military personnel with MHI  |                                 |                         | Military personnel without MHI            |                                              |                         |
|--------------------------------------|------------------------------|---------------------------------|-------------------------|-------------------------------------------|----------------------------------------------|-------------------------|
|                                      | Disclosure<br>N=245<br>N (%) | Non-disclosure<br>N=79<br>N (%) | Total<br>N=324<br>N (%) | Disclosure<br>intention<br>N=467<br>N (%) | Non-disclosure<br>intention<br>N=87<br>N (%) | Total<br>N=554<br>N (%) |
| <b>Demographics</b>                  |                              |                                 |                         |                                           |                                              |                         |
| Sex                                  |                              |                                 |                         |                                           |                                              |                         |
| Male                                 | 215 (87.8)                   | 68 (86.1)                       | 283 (87.4)              | 430 (92.1)                                | 79 (90.8)                                    | 509 (91.9)              |
| Female                               | 30 (12.2)                    | 11 (13.9)                       | 41 (12.7)               | 37 (7.9)                                  | 8 (9.2)                                      | 45 (8.1)                |
| Age                                  |                              |                                 |                         |                                           |                                              |                         |
| <20                                  | 0 (0.0)                      | 0 (0.0)                         | 0 (0.0)                 | 0 (0.0)                                   | 0 (0.0)                                      | 0 (0.0)                 |
| 21-30                                | 15 (6.1)                     | 12 (15.2)                       | 27 (8.3)                | 55 (11.8)                                 | 10 (11.5)                                    | 65 (11.7)               |
| 31-40                                | 81 (33.1)                    | 26 (32.9)                       | 107 (33.0)              | 149 (31.9)                                | 41 (47.1)                                    | 190 (34.3)              |
| 41-50                                | 76 (31.0)                    | 19 (24.1)                       | 95 (29.3)               | 134 (28.7)                                | 18 (20.7)                                    | 152 (27.4)              |
| 51-60                                | 68 (27.8)                    | 21 (26.6)                       | 89 (27.5)               | 119 (25.5)                                | 17 (19.5)                                    | 136 (24.6)              |
| >60                                  | 5 (2.0)                      | 1 (1.3)                         | 6 (1.9)                 | 10 (2.1)                                  | 1 (1.2)                                      | 11 (2.0)                |
| Marital Status                       |                              |                                 |                         |                                           |                                              |                         |
| Partner (vs. Single)                 | <b>183 (74.7)</b>            | <b>69 (87.3)</b>                | <b>252 (77.8)</b>       | 394 (84.4)                                | 76 (87.4)                                    | 470 (84.8)              |
| Educational Level                    |                              |                                 |                         |                                           |                                              |                         |
| Low                                  | 26 (10.6)                    | 4 (5.1)                         | 30 (9.3)                | 49 (10.5)                                 | 2 (2.3)                                      | 51 (9.2)                |
| Medium                               | 136 (55.5)                   | 39 (49.4)                       | 175 (54.0)              | 242 (51.8)                                | 48 (55.2)                                    | 290 (52.4)              |
| High                                 | 83 (33.9)                    | 36 (45.6)                       | 119 (36.7)              | 176 (37.7)                                | 37 (42.5)                                    | 213 (38.5)              |
| <b>Work related context</b>          |                              |                                 |                         |                                           |                                              |                         |
| Type of work                         |                              |                                 |                         |                                           |                                              |                         |
| Operational work                     | 188 (76.7)                   | 67 (84.8)                       | 255 (78.7)              | 258 (55.3)                                | 50 (57.5)                                    | 308 (55.6)              |
| Military branch                      |                              |                                 |                         |                                           |                                              |                         |
| Marine                               | 20 (8.2)                     | 2 (2.5)                         | 22 (6.8)                | 75 (16.1)                                 | 16 (18.4)                                    | 91 (16.4)               |
| Army                                 | 119 (48.6)                   | 47 (59.5)                       | 166 (51.2)              | 196 (42.0)                                | 40 (46.0)                                    | 236 (42.6)              |
| Air-force                            | 69 (28.2)                    | 15 (19.0)                       | 84 (25.9)               | 120 (25.7)                                | 15 (17.2)                                    | 135 (24.4)              |
| Military-police                      | 16 (6.5)                     | 4 (5.1)                         | 20 (6.2)                | 21 (4.5)                                  | 5 (5.7)                                      | 26 (4.7)                |
| Staff                                | 20 (8.2)                     | 11 (13.9)                       | 31 (9.6)                | 53 (11.3)                                 | 11 (12.6)                                    | 64 (11.6)               |
| Other                                | 1 (.4)                       | 0 (0.0)                         | 1 (.3)                  | 2 (.4)                                    | 0 (0.0)                                      | 2 (.4)                  |
| Ranks                                |                              |                                 |                         |                                           |                                              |                         |
| Military personnel                   | 29 (11.8)                    | 15 (19.0)                       | 44 (13.6)               | 26 (5.6)                                  | 8 (9.2)                                      | 34 (6.1)                |
| Non-commissioned officers            | 132 (53.9)                   | 33 (41.8)                       | 165 (50.9)              | 225 (48.2)                                | 32 (36.8)                                    | 257 (46.4)              |
| Officers                             | 84 (34.3)                    | 31 (39.2)                       | 115 (35.5)              | 216 (46.3)                                | 47 (54.0)                                    | 263 (47.5)              |
| Years of service (M (SD))            |                              |                                 |                         |                                           |                                              |                         |
| Years                                | 22.25 (9.08)                 | 21.42 (9.92)                    | 22.05 (9.28)            | 22.20 (9.62)                              | 20.11 (9.98)                                 | 21.86 (9.70)            |
| <b>Mental health related context</b> |                              |                                 |                         |                                           |                                              |                         |
| Past or current (self-reported) MHI  |                              |                                 |                         |                                           |                                              |                         |
| Past MHI                             | 194 (79.2)                   | 62 (78.5)                       | 256 (79.0)              | N/A                                       | N/A                                          | N/A                     |
| MHI work related                     |                              |                                 |                         |                                           |                                              |                         |
| Yes                                  | 167 (68.2)                   | 48 (60.8)                       | 215 (66.4)              | N/A                                       | N/A                                          | N/A                     |
| Severity of symptoms                 |                              |                                 |                         |                                           |                                              |                         |
| Mean severity (M, SD)                | <b>7.38 (1.87)</b>           | <b>6.01 (2.07)</b>              | <b>7.05 (2.01)</b>      | N/A                                       | N/A                                          | N/A                     |

Note: Military personnel with MHI were asked about their type of work and rank at the time their MHI started.

485

486

487

488

489

For peer review only

1  
2  
3  
4  
5  
6  
7  
8  
9  
10  
11  
12  
13  
14  
15  
16  
17  
18  
19  
20  
21  
22  
23  
24  
25  
26  
27  
28  
29  
30  
31  
32  
33  
34  
35  
36  
37  
38  
39  
40  
41  
42  
43  
44  
45  
46  
47  
48  
49  
50  
51  
52  
53  
54  
55  
56  
57  
58  
59  
60

1  
2  
3  
4  
5  
6  
7  
8  
9  
10  
11  
12  
13  
14  
15  
16  
17  
18  
19  
20  
21  
22  
23  
24  
25  
26  
27  
28  
29  
30  
31  
32  
33  
34  
35  
36  
37  
38  
39  
40  
41  
42  
43  
44  
45  
46  
47  
48  
49  
50  
51  
52  
53  
54  
55  
56  
57  
58  
59  
60

For peer review only

## Figure 1

Caption: Needs regarding future disclosure

### Statements

#### Contributorship

R.I. Bogaers: As the PhD student on the project, R.I. Bogaers was involved in all aspects of the study. S.G. Geuze: Was involved by advising R.I. Bogaers during the formulating of research question(s) and designing the study. Also, he provided multiple rounds of feedback on the manuscript of the paper. N. Greenberg: Was involved by advising R.I. Bogaers during designing the study and provided one critical round of feedback on the manuscript of the paper. F.R.M. Leijten: Was involved by advising R.I. Bogaers during the formulating of research question(s) and designing the study and provided one critical round of feedback on the manuscript of the paper. J. van Weeghel: Was involved by advising R.I. Bogaers during the formulating of research question(s) and designing the study. Also, he provided multiple rounds of feedback on the manuscript of the paper. H. van de Mheen: Was involved by advising R.I. Bogaers during the formulating of research question(s) and designing the study and provided one critical round of feedback on the manuscript of the paper. A.D. Rozema: Was involved by advising R.I. Bogaers during the formulating of research question(s) and designing the study and provided one critical round of feedback on the manuscript of the paper. E.P.M. Brouwers: Project leader who wrote the research proposal. Was involved by advising R.I. Bogaers during the formulating of research question(s) and designing the study. Provided multiple rounds of critical feedback on the manuscript of the paper.

### **Funding statement**

This work was mainly supported by the IMPACT PhD Program 2018 of Tilburg University (no grant number). Additionally, the work was partially supported by a grant from the Dutch Ministry of Defence (no grant number), but this grant did not influence the interpretation of the data; the writing of the paper; or the decision to submit the paper for publication. These funding sources were not involved in study design; analysis and interpretation of data; writing of the report; and in the decision to submit the article for publication.

### **Competing of Interests**

R.I. Bogaers reports grants from The Dutch Ministry of Defence, during the conduct of the study. However, this did not influence the interpretation of the data or the decision to submit the paper for publication. Dr. Geuze has nothing to disclose. Prof. Greenberg is the Royal College of Psychiatrists Lead for Trauma and the Military; however, all views expressed are his own. Dr. Leijten is an employee at the Ministry of Defence but this did not influence the interpretation of the data or the decision to submit the paper for publication. Prof. van Weeghel has nothing to disclose. Prof. van de Mheen has nothing to disclose. Dr. Rozema has nothing to disclose. Prof. Brouwers reports grants from The Dutch Ministry of Defence, during the conduct of the study. However, this did not influence the interpretation of the data or the decision to submit the paper for publication.

### **Ethics approval**

Written informed consent was obtained from all subjects/patients. The authors assert that all procedures contributing to this work comply with the ethical standards of the relevant national and institutional committees on human experimentation and with the Helsinki Declaration of 1975, as revised in 2008. All procedures involving human subjects/patients



were approved by the Tilburg School of Social and Behavioral Sciences Ethics Review Boards (approval number RP324) and the Dutch Military Ethics Review Board.

### Data sharing

The data that support the findings of this study are available upon reasonable request from the corresponding author, R.I. Bogaers.

### Acknowledgements

We thank the people who participated in this study and shared their personal experiences with us, giving us insight into this important topic. We also thank the providers of the funding for this research, the IMPACT PhD Program 2018 of Tilburg University and a grant from the Dutch Ministry of Defence. Finally, we thank the military research department, and especially Jolanda Snijders, who helped with participant recruitment.

### References

1. Brouwers EP. Social stigma is an underestimated contributing factor to unemployment in people with mental illness or mental health issues: position paper and future directions. *BMC psychology*. 2020;8(1):1-7.
2. Jones AM. Disclosure of mental illness in the workplace: A literature review. *American Journal of Psychiatric Rehabilitation*. 2011;14(3):212-29.
3. Brohan E, Henderson C, Wheat K, Malcolm E, Clement S, Barley EA, et al. Systematic review of beliefs, behaviours and influencing factors associated with disclosure of a mental health problem in the workplace. *BMC psychiatry*. 2012;12(1):11.
4. Van Beukering I, Smits S, Janssens K, Bogaers R, Joosen M, Bakker M, et al. In what ways does health related stigma affect sustainable employment and well-being at work? A systematic review. *Journal of Occupational Rehabilitation*. 2021:1-15.
5. Brouwers E, Joosen M, van Zelst C, Van Weeghel J. To Disclose or Not to Disclose: A Multi-stakeholder Focus Group Study on Mental Health Issues in the Work Environment. *Journal of occupational rehabilitation*. 2019:1-9.
6. Bogaers R, Geuze E, Van Weeghel J, Leijten F, Rüsç N, Van De Mheen D, et al. Decision (not) to disclose mental health conditions or substance abuse in the work environment: a multiperspective focus group study within the military. *BMJ open*. 2021;11(10):e049370.
7. Gignac MA, Jetha A, Ginis KAM, Ibrahim S. Does it matter what your reasons are when deciding to disclose (or not disclose) a disability at work? The association of workers'

- 1  
2  
3 approach and avoidance goals with perceived positive and negative workplace outcomes.  
4 *Journal of Occupational Rehabilitation*. 2021:1-14.
- 5  
6 8. Stergiou-Kita M, Mansfield E, Bezo R, Colantonio A, Garritano E, Lafrance M, et al.  
7 Danger zone: Men, masculinity and occupational health and safety in high risk occupations.  
8 *Safety science*. 2015;80:213-20.
- 9  
10 9. van der Wal SJ, Gorter R, Reijnen A, Geuze E, Vermetten E. Cohort profile: The  
11 prospective research in stress-related military operations (PRISMO) study in the Dutch armed  
12 forces. *BMJ open*. 2019;9(3):e026670.
- 13  
14 10. Bogaers R, Geuze E, van Weeghel J, Leijten F, van de Mheen D, Varis P, et al.  
15 Barriers and facilitators for treatment-seeking for mental health conditions and substance  
16 misuse: multi-perspective focus group study within the military. *BJPsych open*. 2020;6(6).
- 17  
18 11. Rüsçh N, Rose C, Holzhausen F, Mulfinger N, Krumm S, Corrigan PW, et al.  
19 Attitudes towards disclosing a mental illness among German soldiers and their comrades.  
20 *Psychiatry research*. 2017;258:200-6.
- 21  
22 12. Bogaers R, Geuze E, Greenberg N, Leijten F, Varis P, van Weeghel J, et al. Seeking  
23 treatment for mental illness and substance abuse: a cross-sectional study on attitudes, beliefs,  
24 and needs of military personnel with and without mental illness. *Journal of psychiatric*  
25 *research*. 2022.
- 26  
27 13. Hastuti R, Timming AR. An inter-disciplinary review of the literature on mental  
28 illness disclosure in the workplace: implications for human resource management. *The*  
29 *International Journal of Human Resource Management*. 2021:1-37.
- 30  
31 14. Toth KE, Yvon F, Villotti P, Lecomte T, Lachance J-P, Kirsh B, et al. Disclosure  
32 dilemmas: how people with a mental health condition perceive and manage disclosure at  
33 work. *Disability and Rehabilitation*. 2021:1-11.
- 34  
35 15. Stratton E, Einboden R, Ryan R, Choi I, Harvey SB, Glozier N. Deciding to Disclose  
36 a Mental Health Condition in Male Dominated Workplaces; a Focus-Group Study. *Frontiers*  
37 *in psychiatry*. 2018;9.
- 38  
39 16. Toth KE, Dewa CS. Employee decision-making about disclosure of a mental disorder  
40 at work. *Journal of occupational rehabilitation*. 2014;24(4):732-46.
- 41  
42 17. Dewa CS, Van Weeghel J, Joosen MC, Brouwers EP. What could influence workers'  
43 decisions to disclose a mental illness at work? *The international journal of occupational and*  
44 *environmental medicine*. 2020;11(3):119.
- 45  
46 18. Dewa CS, Van Weeghel J, Joosen MC, Gronholm PC, Brouwers EP. Workers'  
47 decisions to disclose a mental health issue to managers and the consequences. *Frontiers in*  
48 *psychiatry*. 2021:311.
- 49  
50 19. Brohan E, Henderson C, Wheat K, Malcolm E, Clement S, Barley EA, et al.  
51 Systematic review of beliefs, behaviours and influencing factors associated with disclosure of  
52 a mental health problem in the workplace. *BMC psychiatry*. 2012;12(1):1-14.
- 53  
54 20. Von Elm E, Altman DG, Egger M, Pocock SJ, Gøtzsche PC, Vandenbroucke JP. The  
55 Strengthening the Reporting of Observational Studies in Epidemiology (STROBE) statement:  
56 guidelines for reporting observational studies. *Bulletin of the World Health Organization*.  
57 2007;85:867-72.
- 58  
59 21. Smarr KL, Keefer AL. Measures of depression and depressive symptoms: beck  
60 depression inventory-II (BDI-II), Center for Epidemiologic Studies Depression Scale  
(CES-D), geriatric depression scale (GDS), hospital anxiety and depression scale (HADS),  
and patient health Questionnaire-9 (PHQ-9). *Arthritis care & research*. 2011;63(S11):S454-  
S66.
22. Ali R, Meena S, Eastwood B, Richards I, Marsden J. Ultra-rapid screening for  
substance-use disorders: the Alcohol, Smoking and Substance Involvement Screening Test  
(ASSIST-Lite). *Drug and alcohol dependence*. 2013;132(1-2):352-61.

23. Bradley KA, DeBenedetti AF, Volk RJ, Williams EC, Frank D, Kivlahan DR. AUDIT-C as a brief screen for alcohol misuse in primary care. *Alcoholism: Clinical and Experimental Research*. 2007;31(7):1208-17.
24. Weathers FW, Litz BT, Keane TM, Palmieri PA, Marx BP, Schnurr PP. The ptsd checklist for dsm-5 (pcl-5). Scale available from the National Center for PTSD at [www.ptsd.va.gov](http://www.ptsd.va.gov). 2013;10.
25. Janssens KM, van Weeghel J, Dewa C, Henderson C, Mathijssen JJ, Joosen MC, et al. Line managers' hiring intentions regarding people with mental health problems: a cross-sectional study on workplace stigma. *Occupational and Environmental Medicine*. 2021.
26. Holmes EP, Corrigan PW, Williams P, Canar J, Kubiak MA. Changing attitudes about schizophrenia. *Schizophrenia bulletin*. 1999;25(3):447-56.
27. van Boekel LC, Brouwers EP, van Weeghel J, Garretsen HF. Comparing stigmatising attitudes towards people with substance use disorders between the general public, GPs, mental health and addiction specialists and clients. *International Journal of Social Psychiatry*. 2015;61(6):539-49.
28. Wright KM, Cabrera OA, Bliese PD, Adler AB, Hoge CW, Castro CA. Stigma and barriers to care in soldiers postcombat. *Psychological Services*. 2009;6(2):108.
29. Gorgievski M, Peeters P, Rietzschel E, Bipp T. Betrouwbaarheid en Validiteit van de Nederlandse vertaling van de Work Design Questionnaire. *Gedrag en Organisatie*. 2016;29(3):273-301.
30. Kim PY, Thomas JL, Wilk JE, Castro CA, Hoge CW. Stigma, barriers to care, and use of mental health services among active duty and National Guard soldiers after combat. *Psychiatric Services*. 2010;61(6):582-8.
31. Coleman S, Stevelink S, Hatch S, Denny J, Greenberg N. Stigma-related barriers and facilitators to help seeking for mental health issues in the armed forces: a systematic review and thematic synthesis of qualitative literature. *Psychological medicine*. 2017;47(11):1880-92.
32. van Hees SG, Carlier BE, Vossen E, Blonk RW, Oomens S. Towards a better understanding of work participation among employees with common mental health problems: a systematic realist review. *Scandinavian Journal of Work, Environment & Health*.
33. van Beukering IE, Bakker M, Corrigan PW, Gürbüz S, Bogaers RI, Janssens KME, et al. Expectations of Mental Illness Disclosure Outcomes in the Work Context: A Cross-Sectional Study Among Dutch Workers. *Journal of Occupational Rehabilitation*. 2022.
34. Stuart H. Mental Illness Stigma Expressed by Police to Police. *The Israel journal of psychiatry and related sciences*. 2017;54(1):18-23.
35. Gould M, Greenberg N, Hetherington J. Stigma and the military: evaluation of a PTSD psychoeducational program. *Journal of Traumatic Stress: Official Publication of The International Society for Traumatic Stress Studies*. 2007;20(4):505-15.
36. Cook JA, Copeland ME, Floyd CB, Jonikas JA, Hamilton MM, Razzano L, et al. A randomized controlled trial of effects of Wellness Recovery Action Planning on depression, anxiety, and recovery. *Psychiatric Services*. 2012;63(6):541-7.
37. Henderson C, Brohan E, Clement S, Williams P, Lassman F, Schauman O, et al. Decision aid on disclosure of mental health status to an employer: feasibility and outcomes of a randomised controlled trial. *The British Journal of Psychiatry*. 2013;203(5):350-7.
38. Rüsçh N, Kösters M. Honest, Open, Proud to support disclosure decisions and to decrease stigma's impact among people with mental illness: Conceptual review and meta-analysis of program efficacy. *Social psychiatry and psychiatric epidemiology*. 2021:1-14.
39. Scior K, Rüsçh N, White C, Corrigan PW. Supporting mental health disclosure decisions: the Honest, Open, Proud programme. *The British Journal of Psychiatry*. 2020;216(5):243-5.

- 1  
2  
3 40. Stratton E, Choi I, Hickie I, Henderson C, Harvey SB, Glozier N. Web-based decision  
4 aid tool for disclosure of a mental health condition in the workplace: a randomised controlled  
5 trial. *Occupational and Environmental Medicine*. 2019;76(9):595-602.  
6  
7 41. Bertilsson M, Klinkhammer S, Staland-Nyman C, de Rijk A. How Managers Find  
8 Out About Common Mental Disorders Among Their Employees. *Journal of Occupational  
9 and Environmental Medicine*. 2021;63(11):975-84.  
10  
11 42. Gayed A, Milligan-Saville JS, Nicholas J, Bryan BT, LaMontagne AD, Milner A, et  
12 al. Effectiveness of training workplace managers to understand and support the mental health  
13 needs of employees: a systematic review and meta-analysis. *Occup Environ Med*.  
14 2018;75(6):462-70.  
15  
16 43. Thabane L, Mbuagbaw L, Zhang S, Samaan Z, Marcucci M, Ye C, et al. A tutorial on  
17 sensitivity analyses in clinical trials: the what, why, when and how. *BMC medical research  
18 methodology*. 2013;13(1):1-12.  
19  
20 44. Yang LH, Wong LY, Grivel MM, Hasin DS. Stigma and substance use disorders: an  
21 international phenomenon. *Current opinion in psychiatry*. 2017;30(5):378-88.  
22  
23  
24  
25  
26  
27  
28  
29  
30  
31  
32  
33  
34  
35  
36  
37  
38  
39  
40  
41  
42  
43  
44  
45  
46  
47  
48  
49  
50  
51  
52  
53  
54  
55  
56  
57  
58  
59  
60

1  
2  
3  
4  
5  
6  
7  
8  
9  
10  
11  
12  
13  
14  
15  
16  
17  
18  
19  
20  
21  
22  
23  
24  
25  
26  
27  
28  
29  
30  
31  
32  
33  
34  
35  
36  
37  
38  
39  
40  
41  
42  
43  
44  
45  
46  
47  
48  
49  
50  
51  
52  
53  
54  
55  
56  
57  
58  
59  
60

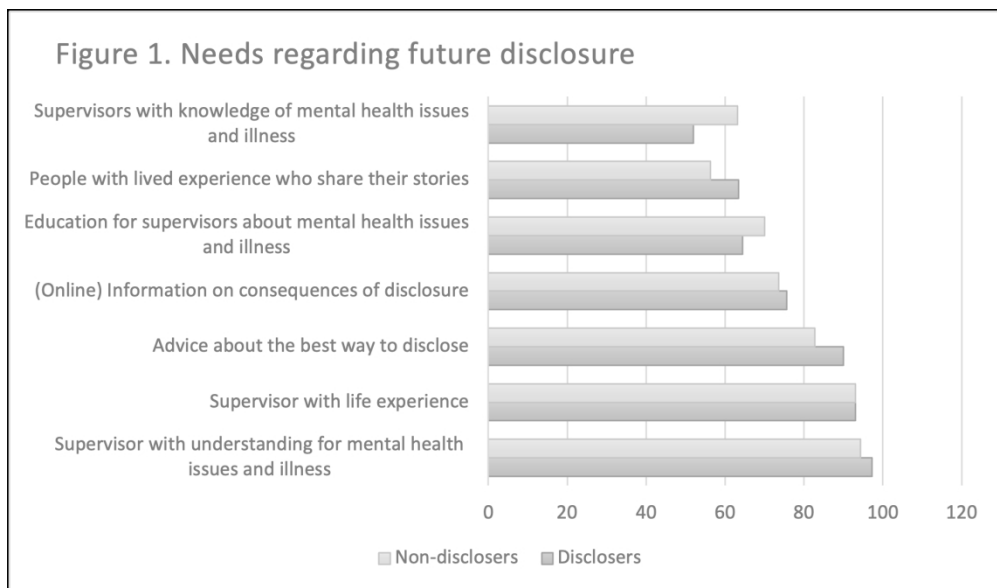

Needs regarding future disclosure

153x89mm (330 x 330 DPI)

## Appendix

## Appendix A. Measures used to assess current mental health issues and illness.

| Scale                                             | Information                                                                                                                                                                                                  | Psychometric properties based on earlier studies                                                                                                                                                                                                                         | Reliability in current study                            | Cut-off score used                                                                                                                | References  |
|---------------------------------------------------|--------------------------------------------------------------------------------------------------------------------------------------------------------------------------------------------------------------|--------------------------------------------------------------------------------------------------------------------------------------------------------------------------------------------------------------------------------------------------------------------------|---------------------------------------------------------|-----------------------------------------------------------------------------------------------------------------------------------|-------------|
| The hospital anxiety and depression scale (HADS). | A 14-item scale measuring anxiety and depression.                                                                                                                                                            | Based on a literature review, reliability of the anxiety scale of the HADS varies from .68 to .93 and the depression scale varies from .67 to .90. Sensitivity and specificity for both anxiety and depression was approximately .80.                                    | Depression:<br>$\alpha=.85$<br>Anxiety:<br>$\alpha=.84$ | A cut-off score of $> 8$ was used for depression and anxiety, as recommended by earlier research.                                 | (16, 36-38) |
| PTSD checklist for the DSM-5 (PCL-5)              | 20-item scale measuring PTSD symptoms. Participants received a question screening whether they had experienced extremely stressful events (examples were provided), and if yes, they received the PCL-5.     | The PCL-5 has strong reliability ( $\alpha = .94$ ) and convergent ( $r_s = .74$ to $.85$ ) and discriminant ( $r_s = .31$ to $.60$ ) validity. Sensitivity is approximately $.77$ and specificity $.96$ .                                                               | $\alpha = .94$                                          | A cut-off of $>33$ was used as an indication of PTSD, following the guidelines.                                                   | (19, 39)    |
| ASSIST-LITE                                       | Measure to assess a wide range of substance use. This questionnaire consists of 6 items, one per substance, and 2-3 follow up questions in case a substance is used by the participant in the past 3 months. | Sensitivity for each substance was between $.8$ and $1.0$ , and specificity between $.7$ and $.8$ . Reliability is N.A. as all questions are about different substances.                                                                                                 | N/A as all questions are about different substances.    | A cut-off of $\geq 2$ was used for all substances except for alcohol, where the cut-off was $\geq 3$ , following the user manual. | (17)        |
| AUDIT-C                                           | A 3-item scale, to assess alcohol use.                                                                                                                                                                       | The AUDIT-C has been validated and shown to have good internal consistency in a variety of different samples. In a previous study among military personnel, the reliability was $.77$ . Specificity is between $.89$ and $.91$ and sensitivity between $.73$ and $.86$ . | $\alpha=.64$                                            | A cut-off of $\geq 8$ was used, as recommended for military population.                                                           | (18, 40)    |

Appendix B. Mental health issues and illness (MHI) scores.

|                                                                 | Military personnel who indicated having (had) MHI |      | Military personnel who indicated not having had MHI |      |
|-----------------------------------------------------------------|---------------------------------------------------|------|-----------------------------------------------------|------|
|                                                                 | N                                                 | %    | N                                                   | %    |
|                                                                 | 324                                               | 37.0 | 554                                                 | 63.1 |
| <b>Type of MHI as reported by military personnel themselves</b> |                                                   |      |                                                     |      |
| Anxiety (incl. obsessive compulsive disorder)                   | 111                                               | 34.3 | N/A                                                 | N/A  |
| Depression (incl. manic and bipolar)                            | 146                                               | 45.1 | N/A                                                 | N/A  |
| Burn-out                                                        | 176                                               | 54.3 | N/A                                                 | N/A  |
| Stress                                                          | 260                                               | 80.3 | N/A                                                 | N/A  |
| Exhaustion                                                      | 205                                               | 63.3 | N/A                                                 | N/A  |
| Post traumatic stress disorder                                  | 55                                                | 17.0 | N/A                                                 | N/A  |
| Psychotic disorders                                             | 3                                                 | .9   | N/A                                                 | N/A  |
| Personality disorder                                            | 77                                                | 23.8 | N/A                                                 | N/A  |
| Autism                                                          | 16                                                | 5.0  | N/A                                                 | N/A  |
| Attention deficit hyperactivity disorder                        | 34                                                | 10.5 | N/A                                                 | N/A  |
| Eating disorder                                                 | 10                                                | 3.1  | N/A                                                 | N/A  |
| Substance use disorder                                          | 56                                                | 17.3 | N/A                                                 | N/A  |
| <b>Current type of MHI based on measures of mental health</b>   |                                                   |      |                                                     |      |
| HADS depression                                                 | 59                                                | 18.2 | 18                                                  | 3.3  |
| HADS anxiety                                                    | 65                                                | 20.1 | 14                                                  | 2.5  |
| Assist lite tobacco                                             | 48                                                | 14.8 | 79                                                  | 14.3 |
| Assist lite alcohol                                             | 50                                                | 15.4 | 38                                                  | 6.9  |
| Assist lite cannabis                                            | 1                                                 | .3   | 3                                                   | .5   |
| Assist lite amphetamine                                         | 2                                                 | .6   | 0                                                   | 0.0  |
| Assist lite sleepmedication                                     | 8                                                 | 2.5  | 2                                                   | .4   |
| Assist lite streetdrug                                          | 0                                                 | 0.0  | 0                                                   | 0.0  |
| Audit C                                                         | 13                                                | 4.0  | 19                                                  | 3.4  |
| PCL-5 score                                                     | 19                                                | 5.9  | 2                                                   | .4   |



**Supplementary Table 1. Beliefs and attitudes regarding disclosure to a supervisor for military personnel with and without mental health issues and illness (MHI)**

| Beliefs and attitudes                                                                  | Military personnel with MHI |                    |             |                       |             |            |       | Military personnel without MHI |                              |            |                                 |            |            |       |
|----------------------------------------------------------------------------------------|-----------------------------|--------------------|-------------|-----------------------|-------------|------------|-------|--------------------------------|------------------------------|------------|---------------------------------|------------|------------|-------|
|                                                                                        | Total (N=324)               | Disclosure (N=245) |             | Non-Disclosure (N=79) |             | Difference |       | Total (N=554)                  | Disclosure intention (N=467) |            | Non-disclosure intention (N=87) |            | Difference |       |
|                                                                                        | N (%)                       | N (%)              | M (SD)      | N (%)                 | M (SD)      | Z          | Sig.  | N (%)                          | N (%)                        | M(SD)      | N (%)                           | M (SD)     | Z          | Sig.  |
| <b>Pro non-disclosure</b>                                                              |                             |                    |             |                       |             |            |       |                                |                              |            |                                 |            |            |       |
| The preference to solve one's own problems.                                            | 239 (73.8)                  | 170 (69.4)         | 2.70 (.78)  | 69 (87.3)             | 3.13 (.76)  | -4.79      | <.001 | 361 (65.2)                     | 284 (60.8)                   | 2.58 (.75) | 77 (88.5)                       | 3.10 (.65) | -6.05      | <.001 |
| Finding it difficult to talk about MHI.                                                | 214 (66.1)                  | 154 (62.9)         | 2.62 (.84)  | 60 (76.0)             | 2.86 (.80)  | -2.28      | .023  | 212 (38.3)                     | 156 (33.4)                   | 2.20 (.76) | 56 (64.4)                       | 2.76 (.78) | -5.93      | <.001 |
| Preference that MHI remains private.                                                   | 189 (58.3)                  | 124 (50.6)         | 2.49 (.77)  | 65 (82.3)             | 3.05 (.75)  | -5.55      | <.001 | 328 (59.2)                     | 252 (54.0)                   | 2.58 (.78) | 76 (87.4)                       | 3.22 (.72) | -6.89      | <.001 |
| Seeing yourself as weak due to MHI.                                                    | 170 (52.5)                  | 125 (51.0)         | 2.44 (.96)  | 45 (57.0)             | 2.52 (.99)  | -.69       | .489  | 146 (26.4)                     | 95 (20.3)                    | 1.90 (.74) | 51 (58.6)                       | 2.49 (.79) | -6.46      | <.001 |
| Being ashamed of the MHI.                                                              | 159 (49.1)                  | 121 (49.4)         | 2.40 (.96)  | 38 (48.1)             | 2.47 (1.00) | -.47       | .636  | 129 (23.3)                     | 85 (18.2)                    | 1.89 (.71) | 44 (50.6)                       | 2.39 (.84) | -5.41      | <.001 |
| Fearing gossip as result of disclosure.                                                | 124 (38.3)                  | 97 (39.6)          | 2.24 (.91)  | 27 (34.2)             | 2.18 (.89)  | -.60       | .547  | 118 (21.3)                     | 72 (15.4)                    | 1.88 (.68) | 46 (52.9)                       | 2.63 (.85) | -7.69      | <.001 |
| Fearing negative career consequences as result of disclosure.                          | 114 (35.2)                  | 86 (35.1)          | 2.11 (.94)  | 28 (35.4)             | 2.16 (.97)  | -.41       | .680  | 135 (24.4)                     | 86 (18.4)                    | 1.90 (.73) | 49 (56.3)                       | 2.55 (.89) | -6.57      | <.001 |
| Unemployment.                                                                          | 35 (N/A)                    | 28 (N/A)           | N/A         | 7 (N/A)               | N/A         | N/A        | N/A   | 28 (N/A)                       | 19 (N/A)                     | N/A        | 9 (N/A)                         | N/A        | N/A        | N/A   |
| Not being able to be promoted to future career steps.                                  | 83 (N/A)                    | 62 (N/A)           | N/A         | 21 (N/A)              | N/A         | N/A        | N/A   | 94 (N/A)                       | 61 (N/A)                     | N/A        | 33 (N/A)                        | N/A        | N/A        | N/A   |
| Not being able to do work tasks anymore that one likes best.                           | 75 (N/A)                    | 59 (N/A)           | N/A         | 16 (N/A)              | N/A         | N/A        | N/A   | 67 (N/A)                       | 43 (N/A)                     | N/A        | 24 (N/A)                        | N/A        | N/A        | N/A   |
| Fearing others will see you differently (negatively) as result of disclosure.          | 107 (33.0)                  | 83 (33.9)          | 2.15 (.85)  | 24 (30.4)             | 2.10 (.84)  | -.48       | .633  | 114 (20.6)                     | 71 (15.2)                    | 1.90 (.65) | 43 (49.4)                       | 2.47 (.82) | -6.35      | <.001 |
| Fearing being treated differently (less well) as results of disclosure.                | 92 (28.4)                   | 69 (28.2)          | 2.07 (.81)  | 23 (29.1)             | 2.06 (.82)  | -.05       | .963  | 90 (16.3)                      | 56 (12.0)                    | 1.83 (.64) | 34 (39.1)                       | 2.31 (.75) | -5.68      | <.001 |
| Fearing others see MHI as one's own fault.                                             | 87 (26.9)                   | 63 (25.7)          | 1.99 (.83)  | 24 (30.4)             | 2.04 (.91)  | -.27       | .785  | 52 (9.4)                       | 33 (7.1)                     | 1.65 (.62) | 19 (21.8)                       | 1.95 (.73) | -3.68      | <.001 |
| Fearing that supervisor would not treat disclosure confidentially.                     | 82 (25.3)                   | 52 (21.2)          | 1.93 (.81)  | 30 (38.0)             | 2.24 (.99)  | -2.42      | .016  | 92 (16.6)                      | 46 (9.9)                     | 1.71 (.65) | 46 (52.9)                       | 2.54 (.91) | -8.14      | <.001 |
| Supervisor is negative about MHI.                                                      | 30 (9.3)                    | 22 (9.0)           | 1.69 (.72)  | 8 (10.1)              | 1.76 (.70)  | -.97       | .330  | 27 (4.9)                       | 11 (2.4)                     | 1.52 (.58) | 16 (18.4)                       | 1.98 (.70) | -5.95      | <.001 |
| No choice, supervisor already heard from someone else.                                 | 5 (N/A)                     | N/A                | N/A         | 5 (6.3)               | 1.55 (.62)  | N/A        | N/A   | N/A                            | N/A                          | N/A        | N/A                             | N/A        | N/A        | N/A   |
| <b>Pro disclosure</b>                                                                  |                             |                    |             |                       |             |            |       |                                |                              |            |                                 |            |            |       |
| Importance of being your true self.                                                    | 310 (95.7)                  | 238 (97.1)         | 3.33 (.56)  | 72 (91.1)             | 3.20 (.63)  | -1.49      | .135  | 509 (91.2)                     | 430 (92.1)                   | 3.34 (.68) | 79 (90.8)                       | 3.18 (.66) | -2.32      | .020  |
| Supervisor who takes MHI seriously.                                                    | 267 (82.4)                  | 207 (84.5)         | 3.11 (.79)  | 60 (76.0)             | 2.90 (.61)  | -2.88      | .004  | 486 (87.7)                     | 426 (91.2)                   | 3.28 (.74) | 60 (69.0)                       | 2.83 (.78) | -5.42      | <.001 |
| Disclosure important due to the responsibility associated with the nature of the work. | 242 (74.7)                  | 209 (85.3)         | 3.04 (.65)  | 33 (41.8)             | 2.35 (.75)  | -7.26      | <.001 | 500 (90.3)                     | 438 (93.8)                   | 3.28 (.59) | 62 (71.3)                       | 2.86 (.81) | -4.71      | <.001 |
| Military has policy which provides good solutions for those with MHI.                  | 234 (72.2)                  | 179 (73.1)         | 2.81 (.79)  | 55 (69.6)             | 2.77 (.83)  | -.38       | .707  | 487 (87.9)                     | 422 (90.4)                   | 3.09 (.55) | 65 (74.7)                       | 2.79 (.70) | -3.86      | <.001 |
| Importance of whether MHI effects occupational functioning.                            | 226 (69.8)                  | 193 (78.8)         | 3.02 (.78)  | 33 (41.8)             | 2.33 (.87)  | -6.15      | <.001 | 414 (74.7)                     | 342 (73.2)                   | 2.79 (.75) | 72 (82.8)                       | 2.98 (.68) | -2.11      | .035  |
| Wanting to be a good example to others.                                                | 146 (45.1)                  | 121 (49.4)         | 2.44 (.83)  | 25 (31.7)             | 2.18 (.69)  | -2.61      | .009  | 373 (67.3)                     | 341 (73.0)                   | 2.88 (.73) | 32 (36.8)                       | 2.23 (.80) | -6.85      | <.001 |
| Importance of needing work accommodations.                                             | 141 (43.5)                  | 129 (52.7)         | 2.44 (.95)  | 12 (15.2)             | 1.72 (.88)  | -5.86      | <.001 | 348 (62.8)                     | 303 (64.9)                   | 2.68 (.75) | 45 (51.7)                       | 2.51 (.83) | -2.02      | .044  |
| The importance of advice from others for disclosure.                                   | 62 (19.1)                   | 55 (22.5)          | 1.91 (.77)  | 7 (8.9)               | 1.63 (.64)  | -2.73      | .006  | 356 (64.3)                     | 302 (64.7)                   | 2.63 (.77) | 54 (62.1)                       | 2.52 (.71) | -1.24      | .216  |
| No choice, supervisor could see it.                                                    | 95 (N/A)                    | 95 (38.8)          | 2.23 (.89)  | N/A                   | N/A         | N/A        | N/A   | N/A                            | N/A                          | N/A        | N/A                             | N/A        | N/A        | N/A   |
| No choice, I had to report sick.                                                       | 115 (N/A)                   | 115 (46.9)         | 2.39 (1.04) | N/A                   | N/A         | N/A        | N/A   | N/A                            | N/A                          | N/A        | N/A                             | N/A        | N/A        | N/A   |
| No choice, I needed treatment during work.                                             | 169 (N/A)                   | 169 (69.0)         | 2.78 (.91)  | N/A                   | N/A         | N/A        | N/A   | N/A                            | N/A                          | N/A        | N/A                             | N/A        | N/A        | N/A   |

Note: A Bonferroni correction was used, with  $\alpha = .05/20 = .003$

Note: For comparison between disclosure intentions of military personnel without MHI, 'very-unlikely' and 'unlikely' were combined, just as 'likely' and 'very-likely'.



**Supplementary Table 2. Logistic and ordinal regressions for the non-disclosure decision and intention to a supervisor.**

|                                                                  | Military personnel with mental health issues or illness<br>(0=disclosure, 1=non-disclosure) |            |              |             |                     |                 | Military personnel without mental health issues or illness<br>(Disclosure 1=very likely, 2=likely, 3=(very)unlikely) |             |              |             |                        |                 |
|------------------------------------------------------------------|---------------------------------------------------------------------------------------------|------------|--------------|-------------|---------------------|-----------------|----------------------------------------------------------------------------------------------------------------------|-------------|--------------|-------------|------------------------|-----------------|
|                                                                  | B                                                                                           | SE         | Wald         | OR          | CI 95%              | Sig.            | B                                                                                                                    | SE          | Wald         | OR          | CI 95%                 | Sig.            |
| Constant                                                         | 4.23                                                                                        | 2.44       | 3.01         | 68.71       | N/A                 | .083            | N/A                                                                                                                  | N/A         | N/A          | N/A         | N/A                    | N/A             |
| Threshold: = 3 (very) unlikely                                   | N/A                                                                                         | N/A        | N/A          | N/A         | N/A                 | N/A             | <b>-8.63</b>                                                                                                         | <b>1.61</b> | <b>28.74</b> | <b>.00</b>  | <b>[7.62E-6 - .00]</b> | <b>&lt;.001</b> |
| Threshold: = 2 (likely)                                          | N/A                                                                                         | N/A        | N/A          | N/A         | N/A                 | N/A             | <b>-5.15</b>                                                                                                         | <b>1.57</b> | <b>10.74</b> | <b>.01</b>  | <b>[-.00-.13]</b>      | <b>.001</b>     |
| <b>Health</b>                                                    |                                                                                             |            |              |             |                     |                 |                                                                                                                      |             |              |             |                        |                 |
| Higher symptom severity                                          | <b>-.33</b>                                                                                 | <b>.10</b> | <b>12.27</b> | <b>.72</b>  | <b>[-.59-.86]</b>   | <b>&lt;.001</b> | N/A                                                                                                                  | N/A         | N/A          | N/A         | N/A                    | N/A             |
| <b>Demographics and experience</b>                               |                                                                                             |            |              |             |                     |                 |                                                                                                                      |             |              |             |                        |                 |
| Gender (female, vs. male)                                        | -.08                                                                                        | .56        | .02          | .92         | [-.31-2.76]         | .882            | -.52                                                                                                                 | .38         | 1.87         | .60         | [-.28-1.25]            | .172            |
| Marital status (partner, vs. single)                             | <b>1.27</b>                                                                                 | <b>.54</b> | <b>5.52</b>  | <b>3.58</b> | <b>[1.24-10.36]</b> | <b>.019</b>     | -.18                                                                                                                 | .28         | .42          | .84         | [-.48-1.44]            | .518            |
| Higher age                                                       | -.19                                                                                        | .19        | .93          | .83         | [-.57-1.21]         | .336            | -.13                                                                                                                 | .10         | 1.66         | .88         | [-.72-1.07]            | .197            |
| More familiarity with mental health issues or illness            | .10                                                                                         | .12        | .64          | 1.10        | [-.87-1.39]         | .424            | -.14                                                                                                                 | .07         | 3.73         | .87         | [-.76-1.00]            | .054            |
| Earlier experience disclosing to a supervisor                    |                                                                                             |            |              |             |                     |                 |                                                                                                                      |             |              |             |                        |                 |
| Negative                                                         | -.86                                                                                        | .75        | 1.34         | .42         | [-.10-1.83]         | .248            | -.41                                                                                                                 | .76         | .30          | .66         | [-.15-2.93]            | .586            |
| Positive                                                         | -.72                                                                                        | .70        | 1.07         | .49         | [-.12-1.91]         | .301            | <b>-.54</b>                                                                                                          | <b>.25</b>  | <b>4.68</b>  | <b>.59</b>  | <b>[.36-.95]</b>       | <b>.031</b>     |
| None                                                             | 0                                                                                           | 0          | 2.22         | 0           | 0                   | .329            | 0                                                                                                                    | 0           | 0            | 1           | 0                      | 0               |
| Seen experience of others with disclosure                        |                                                                                             |            |              |             |                     |                 |                                                                                                                      |             |              |             |                        |                 |
| Negative                                                         | .29                                                                                         | .59        | .24          | 1.34        | [-.42-4.24]         | .623            | <b>1.12</b>                                                                                                          | <b>.38</b>  | <b>8.52</b>  | <b>3.07</b> | <b>[1.45-6.52]</b>     | <b>.004</b>     |
| Positive                                                         | .40                                                                                         | .54        | .55          | 1.49        | [-.52-4.29]         | .458            | -.09                                                                                                                 | .21         | .18          | .92         | [-.61-1.38]            | .672            |
| None                                                             | 0                                                                                           | 0          | .68          | 0           | 0                   | .713            | 0                                                                                                                    | 0           | 0            | 1           | 0                      | 0               |
| <b>Work context</b>                                              |                                                                                             |            |              |             |                     |                 |                                                                                                                      |             |              |             |                        |                 |
| Rank                                                             | -.29                                                                                        | .29        | 1.05         | .75         | [-.43-1.31]         | .305            | .31                                                                                                                  | .17         | 3.           | 3.18        | [-.97-1.90]            | .074            |
| Unit cohesion                                                    | .17                                                                                         | .23        | .55          | 1.19        | [-.76-1.86]         | .459            | -.02                                                                                                                 | .13         | .03          | .98         | [-.75-1.27]            | .870            |
| Relationship quality supervisor                                  | <b>-.76</b>                                                                                 | <b>.32</b> | <b>5.73</b>  | <b>.47</b>  | <b>[-.25-.87]</b>   | <b>.017</b>     | <b>-1.39</b>                                                                                                         | <b>.27</b>  | <b>27.14</b> | <b>.25</b>  | <b>[-.15-.42]</b>      | <b>&lt;.001</b> |
| <b>Beliefs and attitudes</b>                                     |                                                                                             |            |              |             |                     |                 |                                                                                                                      |             |              |             |                        |                 |
| <b>Pro non-disclosure</b>                                        |                                                                                             |            |              |             |                     |                 |                                                                                                                      |             |              |             |                        |                 |
| Preference for privacy                                           | <b>.71</b>                                                                                  | <b>.31</b> | <b>5.40</b>  | <b>2.05</b> | <b>[1.12-3.76]</b>  | <b>.020</b>     | <b>.69</b>                                                                                                           | <b>.15</b>  | <b>22.51</b> | <b>1.99</b> | <b>[1.50-2.65]</b>     | <b>&lt;.001</b> |
| Preference self-management                                       | <b>.58</b>                                                                                  | <b>.30</b> | <b>3.87</b>  | <b>1.79</b> | <b>[1.00-3.20]</b>  | <b>.049</b>     | <b>.49</b>                                                                                                           | <b>.16</b>  | <b>9.57</b>  | <b>1.64</b> | <b>[1.20-2.23]</b>     | <b>.002</b>     |
| Stigma related concerns                                          | <b>.79</b>                                                                                  | <b>.40</b> | <b>4.00</b>  | <b>2.21</b> | <b>[1.02-4.79]</b>  | <b>.046</b>     | <b>.56</b>                                                                                                           | <b>.23</b>  | <b>5.93</b>  | <b>1.76</b> | <b>[1.12-2.77]</b>     | <b>.015</b>     |
| Difficulty talking about mental health issues or illness         | .02                                                                                         | .29        | .00          | 1.02        | [-.57-1.81]         | .952            | <b>.41</b>                                                                                                           | <b>.15</b>  | <b>7.51</b>  | <b>1.51</b> | <b>[1.13-2.03]</b>     | <b>.006</b>     |
| <b>Pro disclosure</b>                                            |                                                                                             |            |              |             |                     |                 |                                                                                                                      |             |              |             |                        |                 |
| Supervisor takes mental health issues or illness seriously       | -.09                                                                                        | .32        | .07          | .92         | [-.50-1.70]         | .787            | <b>-.45</b>                                                                                                          | <b>.14</b>  | <b>9.63</b>  | <b>.64</b>  | <b>[.48-.85]</b>       | <b>.002</b>     |
| Importance advice others for disclosure                          | <b>-.57</b>                                                                                 | <b>.29</b> | <b>3.94</b>  | <b>.56</b>  | <b>[-.32-.99]</b>   | <b>.047</b>     | -.18                                                                                                                 | .14         | 1.65         | .84         | [-.64-1.10]            | .199            |
| Mental health issues or illness effects occupational functioning | <b>-.90</b>                                                                                 | <b>.27</b> | <b>10.93</b> | <b>.41</b>  | <b>[-.24-.69]</b>   | <b>.001</b>     | -.10                                                                                                                 | .15         | .39          | .91         | [-.68-1.22]            | .531            |
| Responsibility due to nature of work                             | -                                                                                           | <b>.29</b> | <b>14.79</b> | <b>.33</b>  | <b>[-.19-.58]</b>   | <b>&lt;.001</b> | -.24                                                                                                                 | .17         | 1.98         | .79         | [-.56-1.10]            | .159            |
| Work accommodations are needed                                   | -.40                                                                                        | .24        | 2.84         | .67         | [-.42-1.07]         | .092            | <b>-.35</b>                                                                                                          | <b>.14</b>  | <b>6.36</b>  | <b>.71</b>  | <b>[-.54-.93]</b>      | <b>.012</b>     |
| Attitude that the military has good policy                       | .27                                                                                         | .24        | 1.30         | 1.31        | [-.82-2.09]         | .254            | -.37                                                                                                                 | .19         | 3.65         | .69         | [-.47-1.01]            | .056            |
| Wanting to be authentic                                          | .04                                                                                         | .34        | .01          | 1.04        | [-.53-2.03]         | .918            | <b>-.50</b>                                                                                                          | <b>.15</b>  | <b>11.33</b> | <b>.61</b>  | <b>[-.46-.81]</b>      | <b>.001</b>     |
| Wanting to be example to others                                  | -.13                                                                                        | .26        | .25          | .88         | [-.53-1.46]         | .619            | <b>-.37</b>                                                                                                          | <b>.15</b>  | <b>6.59</b>  | <b>.69</b>  | <b>[-.52-.92]</b>      | <b>.010</b>     |

*Note: Earlier experiences, both own and others, were each represented as three dummy variables with 'none' serving as the reference group.*

**STROBE 2007 (v4) Statement—Checklist of items that should be included in reports of *cross-sectional studies***

| Section/Topic                | Item # | Recommendation                                                                                                                                                                       | Reported on page # |
|------------------------------|--------|--------------------------------------------------------------------------------------------------------------------------------------------------------------------------------------|--------------------|
| Title and abstract           | 1      | (a) Indicate the study's design with a commonly used term in the title or the abstract                                                                                               | 1-2                |
|                              |        | (b) Provide in the abstract an informative and balanced summary of what was done and what was found                                                                                  | 2-3                |
| <b>Introduction</b>          |        |                                                                                                                                                                                      |                    |
| Background/rationale         | 2      | Explain the scientific background and rationale for the investigation being reported                                                                                                 | 4-5                |
| Objectives                   | 3      | State specific objectives, including any prespecified hypotheses                                                                                                                     | 5                  |
| <b>Methods</b>               |        |                                                                                                                                                                                      |                    |
| Study design                 | 4      | Present key elements of study design early in the paper                                                                                                                              | 6                  |
| Setting                      | 5      | Describe the setting, locations, and relevant dates, including periods of recruitment, exposure, follow-up, and data collection                                                      | 6-7                |
| Participants                 | 6      | (a) Give the eligibility criteria, and the sources and methods of selection of participants                                                                                          | 6-7                |
| Variables                    | 7      | Clearly define all outcomes, exposures, predictors, potential confounders, and effect modifiers. Give diagnostic criteria, if applicable                                             | 7-10               |
| Data sources/<br>measurement | 8*     | For each variable of interest, give sources of data and details of methods of assessment (measurement). Describe comparability of assessment methods if there is more than one group | 7-9                |
| Bias                         | 9      | Describe any efforts to address potential sources of bias                                                                                                                            | 18-19              |
| Study size                   | 10     | Explain how the study size was arrived at                                                                                                                                            | 6-7, 11            |
| Quantitative variables       | 11     | Explain how quantitative variables were handled in the analyses. If applicable, describe which groupings were chosen and why                                                         | 9-10               |
| Statistical methods          | 12     | (a) Describe all statistical methods, including those used to control for confounding                                                                                                | 9-10               |
|                              |        | (b) Describe any methods used to examine subgroups and interactions                                                                                                                  | 9-10               |
|                              |        | (c) Explain how missing data were addressed                                                                                                                                          | 10                 |
|                              |        | (d) If applicable, describe analytical methods taking account of sampling strategy                                                                                                   | N/A                |
|                              |        | (e) Describe any sensitivity analyses                                                                                                                                                | N/A                |

|                          |     |                                                                                                                                                                                                              |         |
|--------------------------|-----|--------------------------------------------------------------------------------------------------------------------------------------------------------------------------------------------------------------|---------|
| <b>Results</b>           |     |                                                                                                                                                                                                              |         |
| Participants             | 13* | (a) Report numbers of individuals at each stage of study—eg numbers potentially eligible, examined for eligibility, confirmed eligible, included in the study, completing follow-up, and analysed            | 11      |
|                          |     | (b) Give reasons for non-participation at each stage                                                                                                                                                         | 11      |
|                          |     | (c) Consider use of a flow diagram                                                                                                                                                                           | N/A     |
| Descriptive data         | 14* | (a) Give characteristics of study participants (eg demographic, clinical, social) and information on exposures and potential confounders                                                                     | 11-12   |
|                          |     | (b) Indicate number of participants with missing data for each variable of interest                                                                                                                          | 10-11   |
| Outcome data             | 15* | Report numbers of outcome events or summary measures                                                                                                                                                         | 11      |
| Main results             | 16  | (a) Give unadjusted estimates and, if applicable, confounder-adjusted estimates and their precision (eg, 95% confidence interval). Make clear which confounders were adjusted for and why they were included | 12 - 14 |
|                          |     | (b) Report category boundaries when continuous variables were categorized                                                                                                                                    | 9-10    |
|                          |     | (c) If relevant, consider translating estimates of relative risk into absolute risk for a meaningful time period                                                                                             | N/A     |
| Other analyses           | 17  | Report other analyses done—eg analyses of subgroups and interactions, and sensitivity analyses                                                                                                               | 9-10    |
| <b>Discussion</b>        |     |                                                                                                                                                                                                              |         |
| Key results              | 18  | Summarise key results with reference to study objectives                                                                                                                                                     | 13      |
| Limitations              | 19  | Discuss limitations of the study, taking into account sources of potential bias or imprecision. Discuss both direction and magnitude of any potential bias                                                   | 18-19   |
| Interpretation           | 20  | Give a cautious overall interpretation of results considering objectives, limitations, multiplicity of analyses, results from similar studies, and other relevant evidence                                   | 15-19   |
| Generalisability         | 21  | Discuss the generalisability (external validity) of the study results                                                                                                                                        | 18-19   |
| <b>Other information</b> |     |                                                                                                                                                                                                              |         |
| Funding                  | 22  | Give the source of funding and the role of the funders for the present study and, if applicable, for the original study on which the present article is based                                                | 24      |

\*Give information separately for cases and controls in case-control studies and, if applicable, for exposed and unexposed groups in cohort and cross-sectional studies.

**Note:** An Explanation and Elaboration article discusses each checklist item and gives methodological background and published examples of transparent reporting. The STROBE checklist is best used in conjunction with this article (freely available on the Web sites of PLoS Medicine at <http://www.plosmedicine.org/>, Annals of Internal Medicine at <http://www.annals.org/>, and Epidemiology at <http://www.epidem.com/>). Information on the STROBE Initiative is available at [www.strobe-statement.org](http://www.strobe-statement.org).
